# Supplementary material for: Long non-coding RNA BZRAP1-AS1 functions in malignancy and prognosis for non-small-cell lung cancer
Source: PeerJ journal article supplement (doi:10.7717/peerj.13871), 2022-08-23
Supplement: Raw_data.zip [file 5F-colony formation.xlsx]

## Sheet: Sheet1
	Negative control			BZRAP1-AS1 OE
H1299	56	50	54	35	44	33
HCC827	82	70	77	40	42	44
