# Supplementary material for: Long non-coding RNA BZRAP1-AS1 functions in malignancy and prognosis for non-small-cell lung cancer
Source: PeerJ journal article supplement (doi:10.7717/peerj.13871), 2022-08-23
Supplement: Raw_data.zip [file 5H-H1299-tumour volume.xlsx]

## Sheet: Sheet1
time	H1299 Negative Control						H1299 BZRAP1-AS1 OE
12 days	16.896	18.513	10.14	36	6.6		10	8.45
15 days	114.376	109.8	17.9685	20.691	52.65		25.088	16.8175	24.5
17 days	37.3643	246.52	180.463	192.32	148.235	120.437	26.594	37.768	38.4295	59.7849	25.1859
19 days	328.192	68.125	345.806	139.907	297.441	330.698	61.1517	15.0398	69.1302	37.2645	89.0501	70.534
21 days	543.313	619.084	630.678	145.276	360.163	400.405	104.643	36.7885	115.956	102.993	113.308	41.9904
