# Supplementary material for: Long non-coding RNA BZRAP1-AS1 functions in malignancy and prognosis for non-small-cell lung cancer
Source: PeerJ journal article supplement (doi:10.7717/peerj.13871), 2022-08-23
Supplement: Raw_data.zip [file 5I-HCC827-tumour volume.xlsx]

## Sheet: Sheet1
time	HCC827 Negative Control (mm3)						HCC827 BZRAP1-AS1 OE (mm3)
21 days	32.231	14.7657	18.908	23.7807			18.5372	12.1191	16.5706	7.8125
24 days	86.5828	78.6396	68.4389	52.8126	45.796	5.1529	43.9413	50.1624	33.2683	31.7582	19.9073
27 days	122.517	173.017	191.709	103.429	60.2507	68.086	106.21	70.6897	66.1901	64.7703	54.8209	51.4947
30 days	306.727	202.906	251.649	223.48	107.189	134.145	123.371	135.409	98.3989	125.611	80.0389	90.4813
33 days	385.934	294.948	312.666	222.92	215.689	176.686	264.361	265.042	180.979	136.892	100.293	74.1604
36 days	494.266	442.986	463.827	379.402	289.12	253.988	229.294	420.919	362.454	252.157	200.885	239.704
