# Supplementary material for: Long non-coding RNA BZRAP1-AS1 functions in malignancy and prognosis for non-small-cell lung cancer
Source: PeerJ journal article supplement (doi:10.7717/peerj.13871), 2022-08-23
Supplement: Raw_data.zip [file clinical data.xlsx]

## Sheet: Sheet1
No	sex	age	smoking history	Histologic type	BZRAP1-AS1 in tumor (2-△CT)	BZRAP1-AS1 in adjacent normal tissues (2-△CT)	TNM stage	Pleura invasion	Vessel carcinoma embolus	CEA	SCC
1	MALE	66	YES	LUSC	4.1e-05	0.01606	IB	NO	NO	4.38	1.49
2	MALE	68	YES	LUAD	0.000788	0.032387	IIIB	YES	YES	4.84	0.33
3	MALE	48	YES	LUAD	0.000345	0.04236	IA3	YES	NO	2.02	0.21
4	MALE	65	YES	LUAD	0.000763	0.031249	IIb	YES	YES	203.53	0.34
5	FEMALE	26	NO	LUAD	0.00057	0.010367	IIIA	YES	NO	0.8	0.47
6	FEMALE	56	YES	LUSC	0.000718	0.024862	IA2	NO	YES	1.99	0.81
7	MALE	70	YES	LUSC	0.000945	0.610079	IIIA	NO	YES	1.38	5.02
8	FEMALE	57	NO	LUAD	0.123446	1.34807	IA3	NO	NO	2.95	0.17
9	MALE	66	YES	LUSC	0.000361	0.017188	IIIB	NO	NO	3.48	0.22
10	MALE	47	YES	LUSC	0.003016	0.105682	IIIB	NO	NO	3.01	7.43
11	FEMALE	54	NO	LUSC	0.000257	0.003591	IIIB	YES	YES	1.71	0.59
12	FEMALE	65	NO	LUAD	1.56409	14.1485	IIB	NO	NO	2.03	0.11
13	MALE	57	YES	LUAD	4.9e-05	0.038273	IIIA	YES	YES	5.91	0.36
14	MALE	66	YES	LUSC	13.805	37.0022	IIA	NO	NO	1.35	0.26
15	MALE	56	NO	LUAD	4.55582	1.41285	IIIA	YES	YES	1	0.27
16	MALE	59	YES	LUSC	15.2171	221.991	IIIA	YES	YES	3.49	0.21
17	FEMALE	64	NO	LUAD	1.26142	0.181885	IB	YES	NO	1.62	0.2
18	MALE	54	YES	LUAD	1.55374	0.127044	IIIA	YES	YES	14.3	0.23
19	MALE	79	NO	LUSC	0.111334	0.904904	IIB	NO	NO	2.73	0.33
20	MALE	77	YES	LUAD	0.180157	0.166675	IIB	NO	NO	7.88	0.88
21	MALE	56	YES	LUSC	0.235117	1.5855	IB	NO	NO	1.67	0.22
22	MALE	56	YES	LUAD	1.02047	1.07558	IIIB	YES	YES	11.6	0.65
23	FEMALE	78	NO	LUAD	1.68501	0.318869	IB	YES	YES	5.15	0.22
24	FEMALE	67	NO	LUAD	0.240284	267.456	IA	YES	YES	2.71	0.17
25	MALE	67	YES	LUAD	19.4247	5.97689	IIB	YES	NO	9.71	0.13
26	MALE	67	YES	LUSC	130.985	33.7116	IIIA	NO	YES	15.83	0.5
27	MALE	57	YES	LUAD	0.108626	0.052831	IIIB	NO	YES	21.94	0.21
28	MALE	56	YES	LUAD	0.186564	0.359151	IIIA	NO	YES	7.29	0.22
29	MALE	61	YES	LUAD	0.205199	32.5321	IIIB	YES	YES	34.72	0.22
30	MALE	69	YES	LUSC	2.55165	15.9515	IIIA	YES	YES	0.68	0.28
31	MALE	66	YES	LUAD	0.994121	12.6974	IA	NO	NO	4.75	0.18
32	FEMALE	72	NO	LUAD	0.184659	13.8593	IB	NO	YES	7.77	0.3
33	FEMALE	55	NO	LUAD	2.81061	1.76339	IA	NO	NO	2.41	0.21
34	MALE	60	YES	LUSC	0.492946	1.09958	IIIA	YES	NO	1.73	0.33
35	MALE	60	YES	LUAD	55.4789	29.5432	IA	NO	NO	31.99	0.17
36	MALE	64	YES	LUAD	0.215888	2.945	IIIA	NO	YES	1.82	0.15
37	FEMALE	60	NO	LUAD	28.9052	6.09945	IA3	YES	YES
38	MALE	78	YES	LUAD	0.428384	18.4472	IIIA	NO	NO	4.59	0.18
39	MALE	61	YES	LUSC	1.44723	0.400653	IA	NO	YES	1.07	0.12
40	MALE	64	YES	LUAD	14.4226	1.19018	IIIA	YES	YES	10.55	0.19
41	MALE	57	YES	LUSC	0.293	5.26313	IIA	NO	NO	2.42	0.14
42	MALE	61	YES	LUSC	108.454	208.505	IIA	NO	NO	2	1.85
43	MALE	56	NO	LUSC	26.7845	13.5246	IIA	NO	NO	0	0
44	FEMALE	55	NO	LUAD	403.871	761.01	IA	NO	YES	5.93	0.2
45	MALE	59	YES	LUSC	0.15873	0.502088	IIA	YES	NO	1.57	0.2
46	MALE	59	YES	LUSC	0.139813	0.368388	IIIA	NO	NO	2.56	0.47
47	MALE	73	YES	LUAD	2.83761	2.92826	IIB	YES	YES	2.71	0.18
48	MALE	52	YES	LUAD	1.52791	0.737096	IA3	NO	NO	2.26	0.4
49	FEMALE	73	NO	LUAD	5.90878	6.26792	IA	NO	NO	1.9	0.21
50	FEMALE	46	NO	LUAD	0.089077	0.175314	IB	NO	NO	2.84	0.2
51	MALE	70	YES	LUSC	0.02351	0.31875	IIB	NO	NO	2.44	0.8
52	FEMALE	55	NO	LUAD	10.7946	13.3802	IIIA	YES	YES	2.2	0.44
53	MALE	60	YES	LUAD	66.9095	164.678	IA	YES	NO	2.95	0.54
54	MALE	57	YES	LUSC	5.6449	63.2979	IB	YES	NO	1.91	0.43
55	MALE	67	YES	LUSC	2.28883	4.12302	IB	YES	NO	1.78	0.59
56	FEMALE	52	NO	LUAD	4.58085	9.01855	IB	YES	NO	3.74	1.07
57	MALE	75	NO	LUSC	0.076026	0.134566	IIB	NO	NO	1.19	0.55
58	MALE	67	NO	LUSC	0.014973	0.056201	IIB	NO	NO	5.73	7.26
59	MALE	66	NO	LUSC	0.056813	0.630392	IA	NO	NO	0
60	MALE	52	YES	LUSC	0.025708	0.037135	IIIA	NO	NO	4.46	2.5
61	MALE	79	YES	LUSC	0.045984	0.069347	IB	NO	NO
62	MALE	57	YES	LUSC	0.027142	0.037998	IB	YES	NO	1.91	0.43
63	FEMALE	73	NO	LUAD	0.10998	0.084804	IB	YES	YES	2.62	0.24
