# Supplementary material for: Long non-coding RNA BZRAP1-AS1 functions in malignancy and prognosis for non-small-cell lung cancer
Source: PeerJ journal article supplement (doi:10.7717/peerj.13871), 2022-08-23
Supplement: Raw_data.zip [file clinical RT-qPCR data.xlsx]

## Sheet: Sheet1
Block Type	96alum
Chemistry	SYBR_GREEN
Experiment File Name	F:\PCR DATA
Experiment Run End Time	2020.10-2021.1
Instrument Type	sds7500
Passive Reference	ROX
Well	Sample Name	Target Name	Task	Reporter	Quencher	RQ	RQ Min	RQ Max	Cт	Cт Mean	ΔCт Mean	ΔCт SE	ΔΔCт	Automatic Ct Threshold	Ct Threshold	Automatic Baseline	Baseline Start	Baseline End	Efficiency	Tm1	Tm2	Tm3	Comments
A7	T45	BZRAP1-AS1	UNKNOWN	SYBR	None	1.27264	0.108268	14.9594	26.4715	27.6982	-4.13446	1.28047	-0.347828	TRUE	0.0893965	TRUE	3	23	1	90.0757
A8	T45	BZRAP1-AS1	UNKNOWN	SYBR	None	1.27264	0.108268	14.9594	26.3694	27.6982	-4.13446	1.28047	-0.347828	TRUE	0.0893965	TRUE	3	23	1	90.0757
A9	T45	BZRAP1-AS1	UNKNOWN	SYBR	None	1.27264	0.108268	14.9594	30.2537	27.6982	-4.13446	1.28047	-0.347828	TRUE	0.0893965	TRUE	3	28	1	65.8503
B7	N45	BZRAP1-AS1	UNKNOWN	SYBR	None	24.5237	8.09651	74.2805	27.6397	27.5769	-8.40274	0.575846	-4.61611	TRUE	0.0893965	TRUE	3	23	1	90.2665
B8	N45	BZRAP1-AS1	UNKNOWN	SYBR	None	24.5237	8.09651	74.2805	27.2871	27.5769	-8.40274	0.575846	-4.61611	TRUE	0.0893965	TRUE	3	24	1	90.0757
B9	N45	BZRAP1-AS1	UNKNOWN	SYBR	None	24.5237	8.09651	74.2805	27.8039	27.5769	-8.40274	0.575846	-4.61611	TRUE	0.0893965	TRUE	3	24	1	90.0757
C7	T46	BZRAP1-AS1	UNKNOWN	SYBR	None	18.9569	8.32677	43.1575	28.0117	27.9437	-8.03128	0.427486	-4.24465	TRUE	0.0893965	TRUE	3	24	1	90.4572
C8	T46	BZRAP1-AS1	UNKNOWN	SYBR	None	18.9569	8.32677	43.1575	27.8168	27.9437	-8.03128	0.427486	-4.24465	TRUE	0.0893965	TRUE	3	24	1	90.2665
C9	T46	BZRAP1-AS1	UNKNOWN	SYBR	None	18.9569	8.32677	43.1575	28.0026	27.9437	-8.03128	0.427486	-4.24465	TRUE	0.0893965	TRUE	3	24	1	90.2665
D7	N46	BZRAP1-AS1	UNKNOWN	SYBR	None	1	0.0594215	16.8289	29.2422	28.6819	-3.78664	1.46694	0	TRUE	0.0893965	TRUE	3	25	1	90.4572
D8	N46	BZRAP1-AS1	UNKNOWN	SYBR	None	1	0.0594215	16.8289	28.7302	28.6819	-3.78664	1.46694	0	TRUE	0.0893965	TRUE	3	25	1	90.4572
D9	N46	BZRAP1-AS1	UNKNOWN	SYBR	None	1	0.0594215	16.8289	28.0733	28.6819	-3.78664	1.46694	0	TRUE	0.0893965	TRUE	3	25	1	90.4572
E7	T47	BZRAP1-AS1	UNKNOWN	SYBR	None	24.186	5.35784	109.179	27.1381	27.7156	-8.38274	0.783177	-4.5961	TRUE	0.0893965	TRUE	3	23	1	90.4572
E8	T47	BZRAP1-AS1	UNKNOWN	SYBR	None	24.186	5.35784	109.179	28.8974	27.7156	-8.38274	0.783177	-4.5961	TRUE	0.0893965	TRUE	3	25	1	90.4572
E9	T47	BZRAP1-AS1	UNKNOWN	SYBR	None	24.186	5.35784	109.179	27.1114	27.7156	-8.38274	0.783177	-4.5961	TRUE	0.0893965	TRUE	3	24	1	90.2665
F7	N47	BZRAP1-AS1	UNKNOWN	SYBR	None	128.581	101.929	162.201	26.0181	25.9967	-10.7932	0.105298	-7.00653	TRUE	0.0893965	TRUE	3	22	1	90.4572
F8	N47	BZRAP1-AS1	UNKNOWN	SYBR	None	128.581	101.929	162.201	Undetermined	25.9967	-10.7932	0.105298	-7.00653	TRUE	0.0893965	TRUE	3	39	1	63.9428
F9	N47	BZRAP1-AS1	UNKNOWN	SYBR	None	128.581	101.929	162.201	25.9754	25.9967	-10.7932	0.105298	-7.00653	TRUE	0.0893965	TRUE	3	23	1	90.2665
G1	T45	GAPDH	UNKNOWN	SYBR	None	0.384788	0.201567	0.734555	32.7659	33.1814	1.34874	0.335971	1.37786	TRUE	0.365033	TRUE	3	28	1	84.9254
G2	T45	GAPDH	UNKNOWN	SYBR	None	0.384788	0.201567	0.734555	33.826	33.1814	1.34874	0.335971	1.37786	TRUE	0.365033	TRUE	3	26	1	84.9254
G3	T45	GAPDH	UNKNOWN	SYBR	None	0.384788	0.201567	0.734555	32.9523	33.1814	1.34874	0.335971	1.37786	TRUE	0.365033	TRUE	3	27	1	85.1162
G4	T46	GAPDH	UNKNOWN	SYBR	None	9.57206	4.025	22.7638	32.9549	32.687	-3.28796	0.450158	-3.25883	TRUE	0.365033	TRUE	3	27	1	85.1162
G5	T46	GAPDH	UNKNOWN	SYBR	None	9.57206	4.025	22.7638	32.419	32.687	-3.28796	0.450158	-3.25883	TRUE	0.365033	TRUE	3	26	1	85.1162
G6	T46	GAPDH	UNKNOWN	SYBR	None	9.57206	4.025	22.7638	32.6872	32.687	-3.28796	0.450158	-3.25883	TRUE	0.365033	TRUE	3	27	1	85.1162
G7	T47	GAPDH	UNKNOWN	SYBR	None	1.21986	0.448256	3.31967	35.7361	35.7825	-0.315843	0.520205	-0.286717	TRUE	0.365033	TRUE	3	30	1	84.7347
G8	T47	GAPDH	UNKNOWN	SYBR	None	1.21986	0.448256	3.31967	35.673	35.7825	-0.315843	0.520205	-0.286717	TRUE	0.365033	TRUE	3	29	1	84.7347
G9	T47	GAPDH	UNKNOWN	SYBR	None	1.21986	0.448256	3.31967	35.9386	35.7825	-0.315843	0.520205	-0.286717	TRUE	0.365033	TRUE	3	30	1	84.7347
H1	N45	GAPDH	UNKNOWN	SYBR	None	1.59072	0.418581	6.04513	34.4657	35.2809	-0.698803	0.693728	-0.669677	TRUE	0.365033	TRUE	3	29	1	84.5439
H2	N45	GAPDH	UNKNOWN	SYBR	None	1.59072	0.418581	6.04513	35.5459	35.2809	-0.698803	0.693728	-0.669677	TRUE	0.365033	TRUE	3	30	1	84.5439
H3	N45	GAPDH	UNKNOWN	SYBR	None	1.59072	0.418581	6.04513	35.831	35.2809	-0.698803	0.693728	-0.669677	TRUE	0.365033	TRUE	3	31	1	84.7347
H4	N46	GAPDH	UNKNOWN	SYBR	None	1	0.0640117	15.6221	32.4387	32.4394	-0.0291258	1.42827	0	TRUE	0.365033	TRUE	3	27	1	84.9254
H5	N46	GAPDH	UNKNOWN	SYBR	None	1	0.0640117	15.6221	32.3533	32.4394	-0.0291258	1.42827	0	TRUE	0.365033	TRUE	3	27	1	84.9254
H6	N46	GAPDH	UNKNOWN	SYBR	None	1	0.0640117	15.6221	32.5263	32.4394	-0.0291258	1.42827	0	TRUE	0.365033	TRUE	3	26	1	84.9254
H7	N47	GAPDH	UNKNOWN	SYBR	None	3.82885	0.85757	17.0949	35.912	34.8239	-1.96604	0.777463	-1.93691	TRUE	0.365033	TRUE	3	30	1	84.5439
H8	N47	GAPDH	UNKNOWN	SYBR	None	3.82885	0.85757	17.0949	33.3346	34.8239	-1.96604	0.777463	-1.93691	TRUE	0.365033	TRUE	3	28	1	81.1104
H9	N47	GAPDH	UNKNOWN	SYBR	None	3.82885	0.85757	17.0949	35.225	34.8239	-1.96604	0.777463	-1.93691	TRUE	0.365033	TRUE	3	30	1	84.5439
A7	T17	BZRAP1-AS1	UNKNOWN	SYBR	None	0.0713453	0.0431899	0.117855	28.3576	28.5153	-3.16901	0.26081	3.80904	TRUE	0.302262	TRUE	3	22	1	90.0444
A8	T17	BZRAP1-AS1	UNKNOWN	SYBR	None	0.0713453	0.0431899	0.117855	28.2125	28.5153	-3.16901	0.26081	3.80904	TRUE	0.302262	TRUE	3	22	1	90.0444
A9	T17	BZRAP1-AS1	UNKNOWN	SYBR	None	0.0713453	0.0431899	0.117855	28.9757	28.5153	-3.16901	0.26081	3.80904	TRUE	0.302262	TRUE	3	22	1	89.8468
B7	N17	BZRAP1-AS1	UNKNOWN	SYBR	None	1	0.152237	6.56869	29.0053	28.9246	-6.97805	0.978087	0	TRUE	0.302262	TRUE	3	23	1	90.2421
B8	N17	BZRAP1-AS1	UNKNOWN	SYBR	None	1	0.152237	6.56869	28.8637	28.9246	-6.97805	0.978087	0	TRUE	0.302262	TRUE	3	22	1	90.2421
B9	N17	BZRAP1-AS1	UNKNOWN	SYBR	None	1	0.152237	6.56869	28.9048	28.9246	-6.97805	0.978087	0	TRUE	0.302262	TRUE	3	23	1	90.0444
C7	T28	BZRAP1-AS1	UNKNOWN	SYBR	None	0.138159			31.9789	31.7864	-4.12245		2.8556	TRUE	0.302262	TRUE	3	26	1	90.2421
C8	T28	BZRAP1-AS1	UNKNOWN	SYBR	None	0.138159			31.2939	31.7864	-4.12245		2.8556	TRUE	0.302262	TRUE	3	25	1	90.2421
C9	T28	BZRAP1-AS1	UNKNOWN	SYBR	None	0.138159			32.0863	31.7864	-4.12245		2.8556	TRUE	0.302262	TRUE	3	26	1	90.2421
D7	N28	BZRAP1-AS1	UNKNOWN	SYBR	None	0.0829683			33.0871	33.4867	-3.38675		3.5913	TRUE	0.302262	TRUE	3	27	1	90.4398
D8	N28	BZRAP1-AS1	UNKNOWN	SYBR	None	0.0829683			33.6414	33.4867	-3.38675		3.5913	TRUE	0.302262	TRUE	3	27	1	90.4398
D9	N28	BZRAP1-AS1	UNKNOWN	SYBR	None	0.0829683			33.7315	33.4867	-3.38675		3.5913	TRUE	0.302262	TRUE	3	27	1	90.2421
E7	T29	BZRAP1-AS1	UNKNOWN	SYBR	None	4.9059			27.6785	27.7408	-9.27257		-2.29452	TRUE	0.302262	TRUE	3	22	1	90.4398
E8	T29	BZRAP1-AS1	UNKNOWN	SYBR	None	4.9059			27.6986	27.7408	-9.27257		-2.29452	TRUE	0.302262	TRUE	3	22	1	90.4398
E9	T29	BZRAP1-AS1	UNKNOWN	SYBR	None	4.9059			27.8453	27.7408	-9.27257		-2.29452	TRUE	0.302262	TRUE	3	22	1	90.4398
F7	N29	BZRAP1-AS1	UNKNOWN	SYBR	None	0.999433			29.8202	29.8369	-6.97723		0.000817617	TRUE	0.302262	TRUE	3	24	1	90.4398
F8	N29	BZRAP1-AS1	UNKNOWN	SYBR	None	0.999433			29.6871	29.8369	-6.97723		0.000817617	TRUE	0.302262	TRUE	3	24	1	90.4398
F9	N29	BZRAP1-AS1	UNKNOWN	SYBR	None	0.999433			30.0034	29.8369	-6.97723		0.000817617	TRUE	0.302262	TRUE	3	24	1	90.2421
G1	T17	GAPDH	UNKNOWN	SYBR	None	0.22131	0.157629	0.310718	32.8809	32.699	1.01474	0.176318	2.17586	TRUE	0.282913	TRUE	3	27	1	84.7076
G2	T17	GAPDH	UNKNOWN	SYBR	None	0.22131	0.157629	0.310718	32.4387	32.699	1.01474	0.176318	2.17586	TRUE	0.282913	TRUE	3	27	1	84.9053
G3	T17	GAPDH	UNKNOWN	SYBR	None	0.22131	0.157629	0.310718	32.7775	32.699	1.01474	0.176318	2.17586	TRUE	0.282913	TRUE	3	27	1	84.9053
G4	T28	GAPDH	UNKNOWN	SYBR	None	0.400955			35.3729	36.0662	0.157369		1.31849	TRUE	0.282913	TRUE	3	30	1	84.7076
G5	T28	GAPDH	UNKNOWN	SYBR	None	0.400955			35.8815	36.0662	0.157369		1.31849	TRUE	0.282913	TRUE	3	30	1	84.7076
G6	T28	GAPDH	UNKNOWN	SYBR	None	0.400955			36.9442	36.0662	0.157369		1.31849	TRUE	0.282913	TRUE	3	31	1	84.7076
G7	T29	GAPDH	UNKNOWN	SYBR	None	2.11138			34.452	34.774	-2.23931		-1.07819	TRUE	0.282913	TRUE	3	28	1	84.7076
G8	T29	GAPDH	UNKNOWN	SYBR	None	2.11138			35.4972	34.774	-2.23931		-1.07819	TRUE	0.282913	TRUE	3	30	1	84.7076
G9	T29	GAPDH	UNKNOWN	SYBR	None	2.11138			34.373	34.774	-2.23931		-1.07819	TRUE	0.282913	TRUE	3	29	1	84.7076
H1	N17	GAPDH	UNKNOWN	SYBR	None	1	0.141405	7.07191	35.2995	34.7415	-1.16112	1.01644	0	TRUE	0.282913	TRUE	3	30	1	84.5099
H2	N17	GAPDH	UNKNOWN	SYBR	None	1	0.141405	7.07191	34.4993	34.7415	-1.16112	1.01644	0	TRUE	0.282913	TRUE	3	29	1	84.5099
H3	N17	GAPDH	UNKNOWN	SYBR	None	1	0.141405	7.07191	34.4258	34.7415	-1.16112	1.01644	0	TRUE	0.282913	TRUE	3	29	1	84.7076
H4	N28	GAPDH	UNKNOWN	SYBR	None	0.782541			35.8975	36.0661	-0.807358		0.353762	TRUE	0.282913	TRUE	3	30	1	84.7076
H5	N28	GAPDH	UNKNOWN	SYBR	None	0.782541			35.8808	36.0661	-0.807358		0.353762	TRUE	0.282913	TRUE	3	31	1	84.7076
H6	N28	GAPDH	UNKNOWN	SYBR	None	0.782541			36.42	36.0661	-0.807358		0.353762	TRUE	0.282913	TRUE	3	31	1	84.7076
H7	N29	GAPDH	UNKNOWN	SYBR	None	1.24436			36.1887	35.3376	-1.47653		-0.315406	TRUE	0.282913	TRUE	3	31	1	84.5099
H8	N29	GAPDH	UNKNOWN	SYBR	None	1.24436			34.8485	35.3376	-1.47653		-0.315406	TRUE	0.282913	TRUE	3	29	1	84.5099
H9	N29	GAPDH	UNKNOWN	SYBR	None	1.24436			34.9757	35.3376	-1.47653		-0.315406	TRUE	0.282913	TRUE	3	29	1	84.3123
A4	T32	BZRAP1-AS1	UNKNOWN	SYBR	None	3.20318	0.847553	12.1059	34.9758	34.1968	-0.336985	0.690859	-1.67951	TRUE	0.344684	TRUE	3	29	1	89.8468
A5	T32	BZRAP1-AS1	UNKNOWN	SYBR	None	3.20318	0.847553	12.1059	34.2317	34.1968	-0.336985	0.690859	-1.67951	TRUE	0.344684	TRUE	3	28	1	89.8468
A6	T32	BZRAP1-AS1	UNKNOWN	SYBR	None	3.20318	0.847553	12.1059	33.383	34.1968	-0.336985	0.690859	-1.67951	TRUE	0.344684	TRUE	3	27	1	89.8468
B4	N32	BZRAP1-AS1	UNKNOWN	SYBR	None	196.369			30.6842	30.784	-6.2749		-7.61742	TRUE	0.344684	TRUE	3	25	1	90.0444
B5	N32	BZRAP1-AS1	UNKNOWN	SYBR	None	196.369			30.9518	30.784	-6.2749		-7.61742	TRUE	0.344684	TRUE	3	25	1	90.0444
B6	N32	BZRAP1-AS1	UNKNOWN	SYBR	None	196.369			30.7161	30.784	-6.2749		-7.61742	TRUE	0.344684	TRUE	3	25	1	90.0444
C4	T33	BZRAP1-AS1	UNKNOWN	SYBR	None	7.3912	5.29344	10.3203	31.7607	31.6981	-1.54329	0.17346	-2.88581	TRUE	0.344684	TRUE	3	25	1	90.2421
C5	T33	BZRAP1-AS1	UNKNOWN	SYBR	None	7.3912	5.29344	10.3203	31.8196	31.6981	-1.54329	0.17346	-2.88581	TRUE	0.344684	TRUE	3	26	1	90.2421
C6	T33	BZRAP1-AS1	UNKNOWN	SYBR	None	7.3912	5.29344	10.3203	31.514	31.6981	-1.54329	0.17346	-2.88581	TRUE	0.344684	TRUE	3	26	1	90.2421
D4	N33	BZRAP1-AS1	UNKNOWN	SYBR	None	11.1069	7.00506	17.6106	31.1621	31.1081	-2.13087	0.239511	-3.47339	TRUE	0.344684	TRUE	3	25	1	90.2421
D5	N33	BZRAP1-AS1	UNKNOWN	SYBR	None	11.1069	7.00506	17.6106	31.4051	31.1081	-2.13087	0.239511	-3.47339	TRUE	0.344684	TRUE	3	26	1	90.2421
D6	N33	BZRAP1-AS1	UNKNOWN	SYBR	None	11.1069	7.00506	17.6106	30.7571	31.1081	-2.13087	0.239511	-3.47339	TRUE	0.344684	TRUE	3	24	1	90.2421
E4	T34	BZRAP1-AS1	UNKNOWN	SYBR	None	1	0.329077	3.0388	33.9821	34.3896	1.34252	0.577538	0	TRUE	0.344684	TRUE	3	28	1	90.4398
E5	T34	BZRAP1-AS1	UNKNOWN	SYBR	None	1	0.329077	3.0388	33.8283	34.3896	1.34252	0.577538	0	TRUE	0.344684	TRUE	3	28	1	90.2421
E6	T34	BZRAP1-AS1	UNKNOWN	SYBR	None	1	0.329077	3.0388	35.3586	34.3896	1.34252	0.577538	0	TRUE	0.344684	TRUE	3	29	1	90.2421
F4	N34	BZRAP1-AS1	UNKNOWN	SYBR	None	50.4098	37.9531	66.955	29.5986	29.5604	-4.31311	0.147486	-5.65563	TRUE	0.344684	TRUE	3	23	1	90.2421
F5	N34	BZRAP1-AS1	UNKNOWN	SYBR	None	50.4098	37.9531	66.955	29.5054	29.5604	-4.31311	0.147486	-5.65563	TRUE	0.344684	TRUE	3	24	1	90.2421
F6	N34	BZRAP1-AS1	UNKNOWN	SYBR	None	50.4098	37.9531	66.955	29.5773	29.5604	-4.31311	0.147486	-5.65563	TRUE	0.344684	TRUE	3	22	1	90.2421
G4	T35	BZRAP1-AS1	UNKNOWN	SYBR	None	0.425909	0.168912	1.07392	36.3227	35.8252	2.5739	0.480568	1.23138	TRUE	0.344684	TRUE	3	31	1	90.2421
G5	T35	BZRAP1-AS1	UNKNOWN	SYBR	None	0.425909	0.168912	1.07392	35.202	35.8252	2.5739	0.480568	1.23138	TRUE	0.344684	TRUE	3	30	1	90.2421
G6	T35	BZRAP1-AS1	UNKNOWN	SYBR	None	0.425909	0.168912	1.07392	35.9509	35.8252	2.5739	0.480568	1.23138	TRUE	0.344684	TRUE	3	30	1	90.2421
H4	N35	BZRAP1-AS1	UNKNOWN	SYBR	None	77.302	4.64011	1287.81	30.1206	30.3221	-4.92991	1.46168	-6.27243	TRUE	0.344684	TRUE	3	24	1	90.0444
H5	N35	BZRAP1-AS1	UNKNOWN	SYBR	None	77.302	4.64011	1287.81	30.2632	30.3221	-4.92991	1.46168	-6.27243	TRUE	0.344684	TRUE	3	23	1	90.0444
H6	N35	BZRAP1-AS1	UNKNOWN	SYBR	None	77.302	4.64011	1287.81	30.5824	30.3221	-4.92991	1.46168	-6.27243	TRUE	0.344684	TRUE	3	24	1	90.0444
A10	T32	GAPDH	UNKNOWN	SYBR	None	15.5184	5.68177	42.3845	32.0167	31.9119	-2.62189	0.522093	-3.9559	TRUE	0.358374	TRUE	3	26	1	84.3123
A11	T32	GAPDH	UNKNOWN	SYBR	None	15.5184	5.68177	42.3845	31.9729	31.9119	-2.62189	0.522093	-3.9559	TRUE	0.358374	TRUE	3	26	1	84.3123
A12	T32	GAPDH	UNKNOWN	SYBR	None	15.5184	5.68177	42.3845	31.7463	31.9119	-2.62189	0.522093	-3.9559	TRUE	0.358374	TRUE	3	25	1	84.1146
B10	N32	GAPDH	UNKNOWN	SYBR	None	6.00068			35.232	35.8078	-1.25111		-2.58512	TRUE	0.358374	TRUE	3	29	1	84.3123
B11	N32	GAPDH	UNKNOWN	SYBR	None	6.00068			36.9611	35.8078	-1.25111		-2.58512	TRUE	0.358374	TRUE	3	32	1	84.3123
B12	N32	GAPDH	UNKNOWN	SYBR	None	6.00068			35.2304	35.8078	-1.25111		-2.58512	TRUE	0.358374	TRUE	3	29	1	84.1146
C10	T33	GAPDH	UNKNOWN	SYBR	None	2.87961	2.09089	3.96585	33.0404	33.0495	-0.191858	0.166313	-1.52587	TRUE	0.358374	TRUE	3	27	1	84.5099
C11	T33	GAPDH	UNKNOWN	SYBR	None	2.87961	2.09089	3.96585	33.1918	33.0495	-0.191858	0.166313	-1.52587	TRUE	0.358374	TRUE	3	27	1	84.5099
C12	T33	GAPDH	UNKNOWN	SYBR	None	2.87961	2.09089	3.96585	32.9165	33.0495	-0.191858	0.166313	-1.52587	TRUE	0.358374	TRUE	3	27	1	84.3123
D10	N33	GAPDH	UNKNOWN	SYBR	None	0.6922	0.29053	1.64919	35.9512	35.1037	1.86476	0.451116	0.530739	TRUE	0.358374	TRUE	3	30	1	84.5099
D11	N33	GAPDH	UNKNOWN	SYBR	None	0.6922	0.29053	1.64919	34.7628	35.1037	1.86476	0.451116	0.530739	TRUE	0.358374	TRUE	3	29	1	84.3123
D12	N33	GAPDH	UNKNOWN	SYBR	None	0.6922	0.29053	1.64919	34.5971	35.1037	1.86476	0.451116	0.530739	TRUE	0.358374	TRUE	3	29	1	84.1146
E10	T34	GAPDH	UNKNOWN	SYBR	None	1	0.463426	2.15784	34.5558	34.3811	1.33402	0.399644	0	TRUE	0.358374	TRUE	3	28	1	84.5099
E11	T34	GAPDH	UNKNOWN	SYBR	None	1	0.463426	2.15784	34.7008	34.3811	1.33402	0.399644	0	TRUE	0.358374	TRUE	3	29	1	84.3123
E12	T34	GAPDH	UNKNOWN	SYBR	None	1	0.463426	2.15784	33.8867	34.3811	1.33402	0.399644	0	TRUE	0.358374	TRUE	3	28	1	84.1146
F10	N34	GAPDH	UNKNOWN	SYBR	None	3.94675	1.84288	8.45243	32.9203	33.2269	-0.646648	0.395722	-1.98066	TRUE	0.358374	TRUE	3	26	1	84.5099
F11	N34	GAPDH	UNKNOWN	SYBR	None	3.94675	1.84288	8.45243	32.8001	33.2269	-0.646648	0.395722	-1.98066	TRUE	0.358374	TRUE	3	27	1	84.5099
F12	N34	GAPDH	UNKNOWN	SYBR	None	3.94675	1.84288	8.45243	33.9602	33.2269	-0.646648	0.395722	-1.98066	TRUE	0.358374	TRUE	3	27	1	84.1146
G10	T35	GAPDH	UNKNOWN	SYBR	None	2.2929	1.09707	4.79222	33.1133	33.3881	0.136841	0.383051	-1.19718	TRUE	0.358374	TRUE	3	27	1	84.5099
G11	T35	GAPDH	UNKNOWN	SYBR	None	2.2929	1.09707	4.79222	33.3968	33.3881	0.136841	0.383051	-1.19718	TRUE	0.358374	TRUE	3	27	1	84.5099
G12	T35	GAPDH	UNKNOWN	SYBR	None	2.2929	1.09707	4.79222	33.6543	33.3881	0.136841	0.383051	-1.19718	TRUE	0.358374	TRUE	3	28	1	84.3123
H10	N35	GAPDH	UNKNOWN	SYBR	None	5.54485	0.329704	93.2512	33.7587	34.1149	-1.13713	1.46659	-2.47115	TRUE	0.358374	TRUE	3	28	1	84.3123
H11	N35	GAPDH	UNKNOWN	SYBR	None	5.54485	0.329704	93.2512	34.3554	34.1149	-1.13713	1.46659	-2.47115	TRUE	0.358374	TRUE	3	28	1	84.1146
H12	N35	GAPDH	UNKNOWN	SYBR	None	5.54485	0.329704	93.2512	34.2304	34.1149	-1.13713	1.46659	-2.47115	TRUE	0.358374	TRUE	3	28	1	84.1146
A4	T25	BZRAP1-AS1	UNKNOWN	SYBR	None	0.281142	0.115909	0.681921	32.7635	32.332	-1.93768	0.460411	1.83063	TRUE	0.1676	TRUE	3	28	1	89.8225
A5	T25	BZRAP1-AS1	UNKNOWN	SYBR	None	0.281142	0.115909	0.681921	31.8009	32.332	-1.93768	0.460411	1.83063	TRUE	0.1676	TRUE	3	27	1	89.8225
A6	T25	BZRAP1-AS1	UNKNOWN	SYBR	None	0.281142	0.115909	0.681921	32.4315	32.332	-1.93768	0.460411	1.83063	TRUE	0.1676	TRUE	3	28	1	90.0213
B4	N25	BZRAP1-AS1	UNKNOWN	SYBR	None	1	0.471367	2.12149	32.4536	32.7926	-3.76831	0.390816	0	TRUE	0.1676	TRUE	3	28	1	90.0213
B5	N25	BZRAP1-AS1	UNKNOWN	SYBR	None	1	0.471367	2.12149	33.1202	32.7926	-3.76831	0.390816	0	TRUE	0.1676	TRUE	3	28	1	90.0213
B6	N25	BZRAP1-AS1	UNKNOWN	SYBR	None	1	0.471367	2.12149	32.8041	32.7926	-3.76831	0.390816	0	TRUE	0.1676	TRUE	3	28	1	90.0213
C4	T26	BZRAP1-AS1	UNKNOWN	SYBR	None	0.520709	0.0901743	3.00682	33.1157	32.8725	-2.82686	0.911126	0.941449	TRUE	0.1676	TRUE	3	29	1	90.2201
C5	T26	BZRAP1-AS1	UNKNOWN	SYBR	None	0.520709	0.0901743	3.00682	32.2975	32.8725	-2.82686	0.911126	0.941449	TRUE	0.1676	TRUE	3	27	1	90.2201
C6	T26	BZRAP1-AS1	UNKNOWN	SYBR	None	0.520709	0.0901743	3.00682	33.2044	32.8725	-2.82686	0.911126	0.941449	TRUE	0.1676	TRUE	3	28	1	90.2201
D4	N26	BZRAP1-AS1	UNKNOWN	SYBR	None	0.0280613	0.00245999	0.320097	37.0084	34.5376	1.38696	1.26487	5.15527	TRUE	0.1676	TRUE	3	31	1	90.2201
D5	N26	BZRAP1-AS1	UNKNOWN	SYBR	None	0.0280613	0.00245999	0.320097	33.7255	34.5376	1.38696	1.26487	5.15527	TRUE	0.1676	TRUE	3	29	1	90.4189
D6	N26	BZRAP1-AS1	UNKNOWN	SYBR	None	0.0280613	0.00245999	0.320097	32.8791	34.5376	1.38696	1.26487	5.15527	TRUE	0.1676	TRUE	3	28	1	90.4189
E4	T27	BZRAP1-AS1	UNKNOWN	SYBR	None	0.048867	0.0185651	0.128628	33.765	33.7114	0.58668	0.502898	4.35499	TRUE	0.1676	TRUE	3	28	1	90.4189
E5	T27	BZRAP1-AS1	UNKNOWN	SYBR	None	0.048867	0.0185651	0.128628	34.4178	33.7114	0.58668	0.502898	4.35499	TRUE	0.1676	TRUE	3	29	1	90.4189
E6	T27	BZRAP1-AS1	UNKNOWN	SYBR	None	0.048867	0.0185651	0.128628	32.9515	33.7114	0.58668	0.502898	4.35499	TRUE	0.1676	TRUE	3	28	1	90.4189
F4	N27	BZRAP1-AS1	UNKNOWN	SYBR	None				27.2986	27.4134				TRUE	0.1676	TRUE	3	22	1	90.4189
F5	N27	BZRAP1-AS1	UNKNOWN	SYBR	None				27.4787	27.4134				TRUE	0.1676	TRUE	3	22	1	90.4189
F6	N27	BZRAP1-AS1	UNKNOWN	SYBR	None				27.4629	27.4134				TRUE	0.1676	TRUE	3	22	1	90.4189
G4	T31	BZRAP1-AS1	UNKNOWN	SYBR	None	0.0491023	0.0250537	0.096235	33.6587	33.408	0.57975	0.349645	4.34806	TRUE	0.1676	TRUE	3	29	1	90.2201
G5	T31	BZRAP1-AS1	UNKNOWN	SYBR	None	0.0491023	0.0250537	0.096235	33.3651	33.408	0.57975	0.349645	4.34806	TRUE	0.1676	TRUE	3	29	1	90.0213
G6	T31	BZRAP1-AS1	UNKNOWN	SYBR	None	0.0491023	0.0250537	0.096235	33.2002	33.408	0.57975	0.349645	4.34806	TRUE	0.1676	TRUE	3	28	1	90.0213
H4	N31	BZRAP1-AS1	UNKNOWN	SYBR	None	0.30498	0.0684823	1.3582	34.0523	33.1034	-2.0551	0.77614	1.71321	TRUE	0.1676	TRUE	3	29	1	90.0213
H5	N31	BZRAP1-AS1	UNKNOWN	SYBR	None	0.30498	0.0684823	1.3582	33.0678	33.1034	-2.0551	0.77614	1.71321	TRUE	0.1676	TRUE	3	28	1	90.0213
H6	N31	BZRAP1-AS1	UNKNOWN	SYBR	None	0.30498	0.0684823	1.3582	32.1902	33.1034	-2.0551	0.77614	1.71321	TRUE	0.1676	TRUE	3	28	1	90.0213
A10	T25	GAPDH	UNKNOWN	SYBR	None	0.296324	0.141241	0.621687	32.1154	32.3612	-1.90845	0.38503	1.75475	TRUE	0.412338	TRUE	3	26	1	84.6533
A11	T25	GAPDH	UNKNOWN	SYBR	None	0.296324	0.141241	0.621687	32.5346	32.3612	-1.90845	0.38503	1.75475	TRUE	0.412338	TRUE	3	26	1	84.4544
A12	T25	GAPDH	UNKNOWN	SYBR	None	0.296324	0.141241	0.621687	32.4336	32.3612	-1.90845	0.38503	1.75475	TRUE	0.412338	TRUE	3	26	1	84.4544
B10	N25	GAPDH	UNKNOWN	SYBR	None	1	0.453436	2.20538	32.6269	32.8978	-3.6632	0.410967	0	TRUE	0.412338	TRUE	3	26	1	84.8521
B11	N25	GAPDH	UNKNOWN	SYBR	None	1	0.453436	2.20538	33.3567	32.8978	-3.6632	0.410967	0	TRUE	0.412338	TRUE	3	27	1	84.6533
B12	N25	GAPDH	UNKNOWN	SYBR	None	1	0.453436	2.20538	32.7097	32.8978	-3.6632	0.410967	0	TRUE	0.412338	TRUE	3	27	1	84.4544
C10	T26	GAPDH	UNKNOWN	SYBR	None	0.189568	0.0258852	1.38828	35.5693	34.4354	-1.26399	1.0346	2.39922	TRUE	0.412338	TRUE	3	29	1	84.6533
C11	T26	GAPDH	UNKNOWN	SYBR	None	0.189568	0.0258852	1.38828	33.7885	34.4354	-1.26399	1.0346	2.39922	TRUE	0.412338	TRUE	3	27	1	84.6533
C12	T26	GAPDH	UNKNOWN	SYBR	None	0.189568	0.0258852	1.38828	33.9484	34.4354	-1.26399	1.0346	2.39922	TRUE	0.412338	TRUE	3	27	1	84.4544
D10	N26	GAPDH	UNKNOWN	SYBR	None	0.0946537	0.0746661	0.119992	32.8263	32.8887	-0.262006	0.123253	3.4012	TRUE	0.412338	TRUE	3	26	1	84.8521
D11	N26	GAPDH	UNKNOWN	SYBR	None	0.0946537	0.0746661	0.119992	32.9427	32.8887	-0.262006	0.123253	3.4012	TRUE	0.412338	TRUE	3	27	1	84.6533
D12	N26	GAPDH	UNKNOWN	SYBR	None	0.0946537	0.0746661	0.119992	32.8971	32.8887	-0.262006	0.123253	3.4012	TRUE	0.412338	TRUE	3	27	1	84.4544
E10	T27	GAPDH	UNKNOWN	SYBR	None	0.218742	0.128097	0.373532	31.6335	31.6542	-1.47051	0.278053	2.19269	TRUE	0.412338	TRUE	3	25	1	84.8521
E11	T27	GAPDH	UNKNOWN	SYBR	None	0.218742	0.128097	0.373532	31.7765	31.6542	-1.47051	0.278053	2.19269	TRUE	0.412338	TRUE	3	25	1	84.6533
E12	T27	GAPDH	UNKNOWN	SYBR	None	0.218742	0.128097	0.373532	31.5527	31.6542	-1.47051	0.278053	2.19269	TRUE	0.412338	TRUE	3	25	1	84.4544
F10	N27	GAPDH	UNKNOWN	SYBR	None				35.274	35.4765				TRUE	0.412338	TRUE	3	29	1	84.4544
F11	N27	GAPDH	UNKNOWN	SYBR	None				35.3307	35.4765				TRUE	0.412338	TRUE	3	29	1	84.4544
F12	N27	GAPDH	UNKNOWN	SYBR	None				35.8249	35.4765				TRUE	0.412338	TRUE	3	29	1	84.0568
G10	T31	GAPDH	UNKNOWN	SYBR	None	0.283084	0.151482	0.529019	30.9423	30.9857	-1.84251	0.324907	1.8207	TRUE	0.412338	TRUE	3	24	1	84.6533
G11	T31	GAPDH	UNKNOWN	SYBR	None	0.283084	0.151482	0.529019	31.057	30.9857	-1.84251	0.324907	1.8207	TRUE	0.412338	TRUE	3	24	1	84.4544
G12	T31	GAPDH	UNKNOWN	SYBR	None	0.283084	0.151482	0.529019	30.9579	30.9857	-1.84251	0.324907	1.8207	TRUE	0.412338	TRUE	3	24	1	84.4544
H10	N31	GAPDH	UNKNOWN	SYBR	None	0.913346	0.310384	2.68764	31.6971	31.6261	-3.53244	0.560827	0.130767	TRUE	0.412338	TRUE	3	25	1	84.4544
H11	N31	GAPDH	UNKNOWN	SYBR	None	0.913346	0.310384	2.68764	31.5717	31.6261	-3.53244	0.560827	0.130767	TRUE	0.412338	TRUE	3	25	1	84.2556
H12	N31	GAPDH	UNKNOWN	SYBR	None	0.913346	0.310384	2.68764	31.6095	31.6261	-3.53244	0.560827	0.130767	TRUE	0.412338	TRUE	3	25	1	84.2556
A4	T1	BZRAP1-AS1	UNKNOWN	SYBR	None	0.0277894	0.00710439	0.1087	36.9692	35.6764	4.48705	0.708731	5.16932	TRUE	0.245263	TRUE	3	31	1	89.7368
A5	T1	BZRAP1-AS1	UNKNOWN	SYBR	None	0.0277894	0.00710439	0.1087	34.617	35.6764	4.48705	0.708731	5.16932	TRUE	0.245263	TRUE	3	29	1	89.7368
A6	T1	BZRAP1-AS1	UNKNOWN	SYBR	None	0.0277894	0.00710439	0.1087	35.4429	35.6764	4.48705	0.708731	5.16932	TRUE	0.245263	TRUE	3	29	1	89.7368
B4	N1	BZRAP1-AS1	UNKNOWN	SYBR	None	9.11167	5.66409	14.6577	30.3969	30.5184	-3.86999	0.247032	-3.18772	TRUE	0.245263	TRUE	3	25	1	89.9351
B5	N1	BZRAP1-AS1	UNKNOWN	SYBR	None	9.11167	5.66409	14.6577	30.4406	30.5184	-3.86999	0.247032	-3.18772	TRUE	0.245263	TRUE	3	25	1	89.9351
B6	N1	BZRAP1-AS1	UNKNOWN	SYBR	None	9.11167	5.66409	14.6577	30.7178	30.5184	-3.86999	0.247032	-3.18772	TRUE	0.245263	TRUE	3	25	1	90.1333
C4	T2	BZRAP1-AS1	UNKNOWN	SYBR	None	6.80159	1.59983	28.9165	32.9736	32.8206	-3.44814	0.752023	-2.76587	TRUE	0.245263	TRUE	3	27	1	90.1333
C5	T2	BZRAP1-AS1	UNKNOWN	SYBR	None	6.80159	1.59983	28.9165	32.6884	32.8206	-3.44814	0.752023	-2.76587	TRUE	0.245263	TRUE	3	27	1	90.1333
C6	T2	BZRAP1-AS1	UNKNOWN	SYBR	None	6.80159	1.59983	28.9165	32.7999	32.8206	-3.44814	0.752023	-2.76587	TRUE	0.245263	TRUE	3	27	1	90.1333
D4	N2	BZRAP1-AS1	UNKNOWN	SYBR	None	23.5465	6.51063	85.1588	30.9019	31.0879	-5.23971	0.667992	-4.55744	TRUE	0.245263	TRUE	3	25	1	90.3316
D5	N2	BZRAP1-AS1	UNKNOWN	SYBR	None	23.5465	6.51063	85.1588	31.2621	31.0879	-5.23971	0.667992	-4.55744	TRUE	0.245263	TRUE	3	25	1	90.3316
D6	N2	BZRAP1-AS1	UNKNOWN	SYBR	None	23.5465	6.51063	85.1588	31.0997	31.0879	-5.23971	0.667992	-4.55744	TRUE	0.245263	TRUE	3	25	1	90.3316
E4	T4	BZRAP1-AS1	UNKNOWN	SYBR	None	1	0.337128	2.96623	34.6821	34.3082	-0.68227	0.564979	0	TRUE	0.245263	TRUE	3	29	1	90.3316
E5	T4	BZRAP1-AS1	UNKNOWN	SYBR	None	1	0.337128	2.96623	34.3194	34.3082	-0.68227	0.564979	0	TRUE	0.245263	TRUE	3	29	1	90.3316
E6	T4	BZRAP1-AS1	UNKNOWN	SYBR	None	1	0.337128	2.96623	33.9231	34.3082	-0.68227	0.564979	0	TRUE	0.245263	TRUE	3	28	1	90.3316
F4	N4	BZRAP1-AS1	UNKNOWN	SYBR	None	51.9237	28.1214	95.8726	29.6331	29.7242	-6.38059	0.318653	-5.69832	TRUE	0.245263	TRUE	3	24	1	90.1333
F5	N4	BZRAP1-AS1	UNKNOWN	SYBR	None	51.9237	28.1214	95.8726	29.6823	29.7242	-6.38059	0.318653	-5.69832	TRUE	0.245263	TRUE	3	23	1	90.3316
F6	N4	BZRAP1-AS1	UNKNOWN	SYBR	None	51.9237	28.1214	95.8726	29.8572	29.7242	-6.38059	0.318653	-5.69832	TRUE	0.245263	TRUE	3	24	1	90.3316
G4	T5	BZRAP1-AS1	UNKNOWN	SYBR	None	9.63483	3.53908	26.23	30.616	31.1542	-3.95053	0.520408	-3.26826	TRUE	0.245263	TRUE	3	25	1	90.1333
G5	T5	BZRAP1-AS1	UNKNOWN	SYBR	None	9.63483	3.53908	26.23	31.7756	31.1542	-3.95053	0.520408	-3.26826	TRUE	0.245263	TRUE	3	27	1	90.1333
G6	T5	BZRAP1-AS1	UNKNOWN	SYBR	None	9.63483	3.53908	26.23	31.0711	31.1542	-3.95053	0.520408	-3.26826	TRUE	0.245263	TRUE	3	25	1	90.1333
H4	N5	BZRAP1-AS1	UNKNOWN	SYBR	None	61.4513	10.7852	350.132	29.2589	29.0665	-6.62364	0.904172	-5.94137	TRUE	0.245263	TRUE	3	24	1	89.9351
H5	N5	BZRAP1-AS1	UNKNOWN	SYBR	None	61.4513	10.7852	350.132	29.047	29.0665	-6.62364	0.904172	-5.94137	TRUE	0.245263	TRUE	3	23	1	89.9351
H6	N5	BZRAP1-AS1	UNKNOWN	SYBR	None	61.4513	10.7852	350.132	28.8936	29.0665	-6.62364	0.904172	-5.94137	TRUE	0.245263	TRUE	3	23	1	90.1333
A10	T1	GAPDH	UNKNOWN	SYBR	None	0.293977	0.178013	0.485485	31.9445	31.5683	0.378923	0.260665	1.76622	TRUE	0.406496	TRUE	3	26	1	84.5825
A11	T1	GAPDH	UNKNOWN	SYBR	None	0.293977	0.178013	0.485485	31.5022	31.5683	0.378923	0.260665	1.76622	TRUE	0.406496	TRUE	3	26	1	84.5825
A12	T1	GAPDH	UNKNOWN	SYBR	None	0.293977	0.178013	0.485485	31.258	31.5683	0.378923	0.260665	1.76622	TRUE	0.406496	TRUE	3	24	1	84.3842
B10	N1	GAPDH	UNKNOWN	SYBR	None	2.69787	1.70057	4.28005	31.4505	31.5693	-2.81912	0.239805	-1.43182	TRUE	0.406496	TRUE	3	25	1	84.7807
B11	N1	GAPDH	UNKNOWN	SYBR	None	2.69787	1.70057	4.28005	31.7243	31.5693	-2.81912	0.239805	-1.43182	TRUE	0.406496	TRUE	3	25	1	84.5825
B12	N1	GAPDH	UNKNOWN	SYBR	None	2.69787	1.70057	4.28005	31.5331	31.5693	-2.81912	0.239805	-1.43182	TRUE	0.406496	TRUE	3	26	1	84.5825
C10	T2	GAPDH	UNKNOWN	SYBR	None	4.47684	1.05701	18.9611	32.6126	32.719	-3.54978	0.750057	-2.16248	TRUE	0.406496	TRUE	3	26	1	84.7807
C11	T2	GAPDH	UNKNOWN	SYBR	None	4.47684	1.05701	18.9611	32.7146	32.719	-3.54978	0.750057	-2.16248	TRUE	0.406496	TRUE	3	26	1	84.5825
C12	T2	GAPDH	UNKNOWN	SYBR	None	4.47684	1.05701	18.9611	32.8298	32.719	-3.54978	0.750057	-2.16248	TRUE	0.406496	TRUE	3	27	1	84.3842
D10	N2	GAPDH	UNKNOWN	SYBR	None	0.814201	0.222159	2.984	34.9682	35.2369	-1.09076	0.674889	0.296544	TRUE	0.406496	TRUE	3	29	1	84.5825
D11	N2	GAPDH	UNKNOWN	SYBR	None	0.814201	0.222159	2.984	35.2925	35.2369	-1.09076	0.674889	0.296544	TRUE	0.406496	TRUE	3	28	1	84.5825
D12	N2	GAPDH	UNKNOWN	SYBR	None	0.814201	0.222159	2.984	35.4499	35.2369	-1.09076	0.674889	0.296544	TRUE	0.406496	TRUE	3	29	1	84.186
E10	T4	GAPDH	UNKNOWN	SYBR	None	1	0.332104	3.0111	34.0742	33.6032	-1.3873	0.57278	0	TRUE	0.406496	TRUE	3	27	1	84.7807
E11	T4	GAPDH	UNKNOWN	SYBR	None	1	0.332104	3.0111	33.3018	33.6032	-1.3873	0.57278	0	TRUE	0.406496	TRUE	3	26	1	84.5825
E12	T4	GAPDH	UNKNOWN	SYBR	None	1	0.332104	3.0111	33.4335	33.6032	-1.3873	0.57278	0	TRUE	0.406496	TRUE	3	28	1	84.3842
F10	N4	GAPDH	UNKNOWN	SYBR	None	3.13715	1.62525	6.05548	32.8753	33.0681	-3.03675	0.341728	-1.64945	TRUE	0.406496	TRUE	3	27	1	84.7807
F11	N4	GAPDH	UNKNOWN	SYBR	None	3.13715	1.62525	6.05548	33.3425	33.0681	-3.03675	0.341728	-1.64945	TRUE	0.406496	TRUE	3	27	1	84.5825
F12	N4	GAPDH	UNKNOWN	SYBR	None	3.13715	1.62525	6.05548	32.9864	33.0681	-3.03675	0.341728	-1.64945	TRUE	0.406496	TRUE	3	27	1	84.3842
G10	T5	GAPDH	UNKNOWN	SYBR	None	5.69083	2.60277	12.4427	31.1239	31.2088	-3.89594	0.406487	-2.50864	TRUE	0.406496	TRUE	3	24	1	84.7807
G11	T5	GAPDH	UNKNOWN	SYBR	None	5.69083	2.60277	12.4427	31.113	31.2088	-3.89594	0.406487	-2.50864	TRUE	0.406496	TRUE	3	24	1	84.5825
G12	T5	GAPDH	UNKNOWN	SYBR	None	5.69083	2.60277	12.4427	31.3896	31.2088	-3.89594	0.406487	-2.50864	TRUE	0.406496	TRUE	3	25	1	84.3842
H10	N5	GAPDH	UNKNOWN	SYBR	None	2.69163	0.477704	15.166	32.8951	32.8744	-2.81578	0.898376	-1.42848	TRUE	0.406496	TRUE	3	26	1	84.3842
H11	N5	GAPDH	UNKNOWN	SYBR	None	2.69163	0.477704	15.166	32.8195	32.8744	-2.81578	0.898376	-1.42848	TRUE	0.406496	TRUE	3	27	1	84.186
H12	N5	GAPDH	UNKNOWN	SYBR	None	2.69163	0.477704	15.166	32.9084	32.8744	-2.81578	0.898376	-1.42848	TRUE	0.406496	TRUE	3	27	1	84.186
A4	T16	BZRAP1-AS1	UNKNOWN	SYBR	None	0.343671	0.0774382	1.52521	33.7843	33.7522	-1.85543	0.774339	1.5409	TRUE	0.385686	TRUE	3	27	1	89.8225
A5	T16	BZRAP1-AS1	UNKNOWN	SYBR	None	0.343671	0.0774382	1.52521	33.2072	33.7522	-1.85543	0.774339	1.5409	TRUE	0.385686	TRUE	3	27	1	89.8225
A6	T16	BZRAP1-AS1	UNKNOWN	SYBR	None	0.343671	0.0774382	1.52521	34.2649	33.7522	-1.85543	0.774339	1.5409	TRUE	0.385686	TRUE	3	27	1	89.8225
B4	N16	BZRAP1-AS1	UNKNOWN	SYBR	None	1	0.699318	1.42997	31.009	31.1665	-3.39633	0.185842	0	TRUE	0.385686	TRUE	3	25	1	90.0213
B5	N16	BZRAP1-AS1	UNKNOWN	SYBR	None	1	0.699318	1.42997	31.3376	31.1665	-3.39633	0.185842	0	TRUE	0.385686	TRUE	3	25	1	90.0213
B6	N16	BZRAP1-AS1	UNKNOWN	SYBR	None	1	0.699318	1.42997	31.1527	31.1665	-3.39633	0.185842	0	TRUE	0.385686	TRUE	3	25	1	90.0213
C4	T22	BZRAP1-AS1	UNKNOWN	SYBR	None	0.0472517	0.0182626	0.122256	33.0055	33.2837	1.00716	0.493967	4.40349	TRUE	0.385686	TRUE	3	27	1	90.2201
C5	T22	BZRAP1-AS1	UNKNOWN	SYBR	None	0.0472517	0.0182626	0.122256	34.1866	33.2837	1.00716	0.493967	4.40349	TRUE	0.385686	TRUE	3	27	1	90.2201
C6	T22	BZRAP1-AS1	UNKNOWN	SYBR	None	0.0472517	0.0182626	0.122256	32.659	33.2837	1.00716	0.493967	4.40349	TRUE	0.385686	TRUE	3	26	1	90.2201
D4	N22	BZRAP1-AS1	UNKNOWN	SYBR	None	0.558099	0.165796	1.87867	32.783	33.3022	-2.55492	0.630704	0.841406	TRUE	0.385686	TRUE	3	26	1	90.4189
D5	N22	BZRAP1-AS1	UNKNOWN	SYBR	None	0.558099	0.165796	1.87867	32.7109	33.3022	-2.55492	0.630704	0.841406	TRUE	0.385686	TRUE	3	27	1	90.4189
D6	N22	BZRAP1-AS1	UNKNOWN	SYBR	None	0.558099	0.165796	1.87867	34.4126	33.3022	-2.55492	0.630704	0.841406	TRUE	0.385686	TRUE	3	28	1	90.2201
E4	T23	BZRAP1-AS1	UNKNOWN	SYBR	None	0.0805911	0.0345744	0.187854	32.8692	33.2791	0.236908	0.439741	3.63324	TRUE	0.385686	TRUE	3	27	1	90.4189
E5	T23	BZRAP1-AS1	UNKNOWN	SYBR	None	0.0805911	0.0345744	0.187854	32.973	33.2791	0.236908	0.439741	3.63324	TRUE	0.385686	TRUE	3	26	1	90.4189
E6	T23	BZRAP1-AS1	UNKNOWN	SYBR	None	0.0805911	0.0345744	0.187854	33.9952	33.2791	0.236908	0.439741	3.63324	TRUE	0.385686	TRUE	3	28	1	90.4189
F4	N23	BZRAP1-AS1	UNKNOWN	SYBR	None	0.169393	0.0657528	0.436389	34.6035	34.9108	-0.83477	0.428993	2.56156	TRUE	0.385686	TRUE	3	27	1	90.2201
F5	N23	BZRAP1-AS1	UNKNOWN	SYBR	None	0.169393	0.0657528	0.436389	Undetermined	34.9108	-0.83477	0.428993	2.56156	TRUE	0.385686	TRUE	3	39	1	61.5905
F6	N23	BZRAP1-AS1	UNKNOWN	SYBR	None	0.169393	0.0657528	0.436389	35.2181	34.9108	-0.83477	0.428993	2.56156	TRUE	0.385686	TRUE	3	29	1	90.2201
G4	T24	BZRAP1-AS1	UNKNOWN	SYBR	None	0.057643	0.046757	0.0710636	33.5409	33.6504	0.720383	0.108759	4.11671	TRUE	0.385686	TRUE	3	27	1	90.0213
G5	T24	BZRAP1-AS1	UNKNOWN	SYBR	None	0.057643	0.046757	0.0710636	33.8358	33.6504	0.720383	0.108759	4.11671	TRUE	0.385686	TRUE	3	27	1	90.2201
G6	T24	BZRAP1-AS1	UNKNOWN	SYBR	None	0.057643	0.046757	0.0710636	33.5747	33.6504	0.720383	0.108759	4.11671	TRUE	0.385686	TRUE	3	28	1	90.2201
H4	N24	BZRAP1-AS1	UNKNOWN	SYBR	None	0.428461	0.124884	1.46999	32.3477	32.91	-2.17356	0.640594	1.22276	TRUE	0.385686	TRUE	3	26	1	90.0213
H5	N24	BZRAP1-AS1	UNKNOWN	SYBR	None	0.428461	0.124884	1.46999	32.9232	32.91	-2.17356	0.640594	1.22276	TRUE	0.385686	TRUE	3	27	1	90.0213
H6	N24	BZRAP1-AS1	UNKNOWN	SYBR	None	0.428461	0.124884	1.46999	33.4592	32.91	-2.17356	0.640594	1.22276	TRUE	0.385686	TRUE	3	27	1	90.0213
A10	T16	GAPDH	UNKNOWN	SYBR	None	0.133008	0.0296434	0.5968	35.9151	35.6203	0.0126966	0.780037	2.91041	TRUE	0.288122	TRUE	3	30	1	84.2556
A11	T16	GAPDH	UNKNOWN	SYBR	None	0.133008	0.0296434	0.5968	34.9811	35.6203	0.0126966	0.780037	2.91041	TRUE	0.288122	TRUE	3	29	1	84.4544
A12	T16	GAPDH	UNKNOWN	SYBR	None	0.133008	0.0296434	0.5968	35.9646	35.6203	0.0126966	0.780037	2.91041	TRUE	0.288122	TRUE	3	30	1	84.0568
B10	N16	GAPDH	UNKNOWN	SYBR	None	1	0.703868	1.42072	31.5097	31.6651	-2.89772	0.182472	0	TRUE	0.288122	TRUE	3	26	1	84.8521
B11	N16	GAPDH	UNKNOWN	SYBR	None	1	0.703868	1.42072	31.8156	31.6651	-2.89772	0.182472	0	TRUE	0.288122	TRUE	3	25	1	84.6533
B12	N16	GAPDH	UNKNOWN	SYBR	None	1	0.703868	1.42072	31.6699	31.6651	-2.89772	0.182472	0	TRUE	0.288122	TRUE	3	26	1	84.4544
C10	T22	GAPDH	UNKNOWN	SYBR	None	0.626552	0.27636	1.42049	29.6816	30.0533	-2.22322	0.425323	0.674493	TRUE	0.288122	TRUE	3	24	1	85.0509
C11	T22	GAPDH	UNKNOWN	SYBR	None	0.626552	0.27636	1.42049	29.6488	30.0533	-2.22322	0.425323	0.674493	TRUE	0.288122	TRUE	3	23	1	84.8521
C12	T22	GAPDH	UNKNOWN	SYBR	None	0.626552	0.27636	1.42049	30.8295	30.0533	-2.22322	0.425323	0.674493	TRUE	0.288122	TRUE	3	25	1	84.6533
D10	N22	GAPDH	UNKNOWN	SYBR	None	1.28041	0.689875	2.37644	32.8184	32.6028	-3.25432	0.321346	-0.356606	TRUE	0.288122	TRUE	3	27	1	84.8521
D11	N22	GAPDH	UNKNOWN	SYBR	None	1.28041	0.689875	2.37644	32.407	32.6028	-3.25432	0.321346	-0.356606	TRUE	0.288122	TRUE	3	26	1	84.6533
D12	N22	GAPDH	UNKNOWN	SYBR	None	1.28041	0.689875	2.37644	32.5829	32.6028	-3.25432	0.321346	-0.356606	TRUE	0.288122	TRUE	3	26	1	84.4544
E10	T23	GAPDH	UNKNOWN	SYBR	None	0.810057	0.494984	1.32568	30.4598	30.4484	-2.59381	0.255954	0.303904	TRUE	0.288122	TRUE	3	24	1	84.8521
E11	T23	GAPDH	UNKNOWN	SYBR	None	0.810057	0.494984	1.32568	30.3827	30.4484	-2.59381	0.255954	0.303904	TRUE	0.288122	TRUE	3	25	1	84.6533
E12	T23	GAPDH	UNKNOWN	SYBR	None	0.810057	0.494984	1.32568	30.5027	30.4484	-2.59381	0.255954	0.303904	TRUE	0.288122	TRUE	3	24	1	84.4544
F10	N23	GAPDH	UNKNOWN	SYBR	None	1.43589	0.745007	2.76747	32.4581	32.3259	-3.41966	0.340947	-0.521948	TRUE	0.288122	TRUE	3	27	1	84.6533
F11	N23	GAPDH	UNKNOWN	SYBR	None	1.43589	0.745007	2.76747	32.5182	32.3259	-3.41966	0.340947	-0.521948	TRUE	0.288122	TRUE	3	27	1	84.4544
F12	N23	GAPDH	UNKNOWN	SYBR	None	1.43589	0.745007	2.76747	32.0013	32.3259	-3.41966	0.340947	-0.521948	TRUE	0.288122	TRUE	3	27	1	84.2556
G10	T24	GAPDH	UNKNOWN	SYBR	None	0.346385	0.271541	0.441859	31.3407	31.5619	-1.36817	0.126496	1.52955	TRUE	0.288122	TRUE	3	25	1	84.6533
G11	T24	GAPDH	UNKNOWN	SYBR	None	0.346385	0.271541	0.441859	31.7155	31.5619	-1.36817	0.126496	1.52955	TRUE	0.288122	TRUE	3	26	1	84.4544
G12	T24	GAPDH	UNKNOWN	SYBR	None	0.346385	0.271541	0.441859	31.6295	31.5619	-1.36817	0.126496	1.52955	TRUE	0.288122	TRUE	3	25	1	84.2556
H10	N24	GAPDH	UNKNOWN	SYBR	None	0.381805	0.129865	1.12252	33.4128	33.575	-1.50863	0.560367	1.38909	TRUE	0.288122	TRUE	3	28	1	84.2556
H11	N24	GAPDH	UNKNOWN	SYBR	None	0.381805	0.129865	1.12252	33.641	33.575	-1.50863	0.560367	1.38909	TRUE	0.288122	TRUE	3	29	1	84.2556
H12	N24	GAPDH	UNKNOWN	SYBR	None	0.381805	0.129865	1.12252	33.6711	33.575	-1.50863	0.560367	1.38909	TRUE	0.288122	TRUE	3	28	1	84.0568
A4	T16	BZRAP1-AS1	UNKNOWN	SYBR	None	0.131156	0.0202747	0.848444	34.4224	33.4062	-2.25638	0.970137	2.93064	TRUE	0.300439	TRUE	3	29	1	89.8468
A5	T16	BZRAP1-AS1	UNKNOWN	SYBR	None	0.131156	0.0202747	0.848444	33.5288	33.4062	-2.25638	0.970137	2.93064	TRUE	0.300439	TRUE	3	28	1	89.8468
A6	T16	BZRAP1-AS1	UNKNOWN	SYBR	None	0.131156	0.0202747	0.848444	32.2674	33.4062	-2.25638	0.970137	2.93064	TRUE	0.300439	TRUE	3	27	1	89.8468
B4	N16	BZRAP1-AS1	UNKNOWN	SYBR	None	1			30.1573	30.3365	-5.18703		0	TRUE	0.300439	TRUE	3	24	1	90.0444
B5	N16	BZRAP1-AS1	UNKNOWN	SYBR	None	1			30.1638	30.3365	-5.18703		0	TRUE	0.300439	TRUE	3	25	1	90.0444
B6	N16	BZRAP1-AS1	UNKNOWN	SYBR	None	1			30.6886	30.3365	-5.18703		0	TRUE	0.300439	TRUE	3	25	1	90.0444
C4	T18	BZRAP1-AS1	UNKNOWN	SYBR	None	0.204682	0.114825	0.364857	32.1479	32.1717	-2.89848	0.300365	2.28855	TRUE	0.300439	TRUE	3	26	1	90.2421
C5	T18	BZRAP1-AS1	UNKNOWN	SYBR	None	0.204682	0.114825	0.364857	31.8406	32.1717	-2.89848	0.300365	2.28855	TRUE	0.300439	TRUE	3	26	1	90.2421
C6	T18	BZRAP1-AS1	UNKNOWN	SYBR	None	0.204682	0.114825	0.364857	32.5267	32.1717	-2.89848	0.300365	2.28855	TRUE	0.300439	TRUE	3	27	1	90.2421
D4	N18	BZRAP1-AS1	UNKNOWN	SYBR	None	0.0999118	0.0310885	0.321096	32.152	32.6283	-1.86383	0.60663	3.3232	TRUE	0.300439	TRUE	3	26	1	90.2421
D5	N18	BZRAP1-AS1	UNKNOWN	SYBR	None	0.0999118	0.0310885	0.321096	32.6615	32.6283	-1.86383	0.60663	3.3232	TRUE	0.300439	TRUE	3	27	1	90.2421
D6	N18	BZRAP1-AS1	UNKNOWN	SYBR	None	0.0999118	0.0310885	0.321096	33.0715	32.6283	-1.86383	0.60663	3.3232	TRUE	0.300439	TRUE	3	28	1	90.2421
E4	T19	BZRAP1-AS1	UNKNOWN	SYBR	None	0.00468817	0.00236652	0.00928748	33.3491	33.0664	2.54973	0.355224	7.73676	TRUE	0.300439	TRUE	3	28	1	90.2421
E5	T19	BZRAP1-AS1	UNKNOWN	SYBR	None	0.00468817	0.00236652	0.00928748	32.4908	33.0664	2.54973	0.355224	7.73676	TRUE	0.300439	TRUE	3	26	1	90.4398
E6	T19	BZRAP1-AS1	UNKNOWN	SYBR	None	0.00468817	0.00236652	0.00928748	33.3594	33.0664	2.54973	0.355224	7.73676	TRUE	0.300439	TRUE	3	28	1	90.2421
F4	N19	BZRAP1-AS1	UNKNOWN	SYBR	None	0.00331601	0.000740344	0.0148524	36.9478	35.7346	3.04931	0.779118	8.23634	TRUE	0.300439	TRUE	3	31	1	90.2421
F5	N19	BZRAP1-AS1	UNKNOWN	SYBR	None	0.00331601	0.000740344	0.0148524	34.573	35.7346	3.04931	0.779118	8.23634	TRUE	0.300439	TRUE	3	29	1	90.2421
F6	N19	BZRAP1-AS1	UNKNOWN	SYBR	None	0.00331601	0.000740344	0.0148524	35.6831	35.7346	3.04931	0.779118	8.23634	TRUE	0.300439	TRUE	3	30	1	90.2421
G4	T21	BZRAP1-AS1	UNKNOWN	SYBR	None	0.0758551	0.0339739	0.169365	32.7192	33.119	-1.46642	0.417374	3.72061	TRUE	0.300439	TRUE	3	27	1	90.2421
G5	T21	BZRAP1-AS1	UNKNOWN	SYBR	None	0.0758551	0.0339739	0.169365	32.8415	33.119	-1.46642	0.417374	3.72061	TRUE	0.300439	TRUE	3	27	1	90.2421
G6	T21	BZRAP1-AS1	UNKNOWN	SYBR	None	0.0758551	0.0339739	0.169365	33.7962	33.119	-1.46642	0.417374	3.72061	TRUE	0.300439	TRUE	3	28	1	90.2421
H4	N21	BZRAP1-AS1	UNKNOWN	SYBR	None	0.012516	0.00346587	0.0451981	33.9716	34.4545	1.13305	0.667216	6.32008	TRUE	0.300439	TRUE	3	28	1	89.8468
H5	N21	BZRAP1-AS1	UNKNOWN	SYBR	None	0.012516	0.00346587	0.0451981	35.6078	34.4545	1.13305	0.667216	6.32008	TRUE	0.300439	TRUE	3	29	1	90.0444
H6	N21	BZRAP1-AS1	UNKNOWN	SYBR	None	0.012516	0.00346587	0.0451981	33.784	34.4545	1.13305	0.667216	6.32008	TRUE	0.300439	TRUE	3	27	1	90.0444
A10	T16	GAPDH	UNKNOWN	SYBR	None	0.0790685	0.0148508	0.420976	34.4972	35.3956	-0.266993	0.86894	3.66075	TRUE	0.281564	TRUE	3	29	1	84.5099
A11	T16	GAPDH	UNKNOWN	SYBR	None	0.0790685	0.0148508	0.420976	35.7523	35.3956	-0.266993	0.86894	3.66075	TRUE	0.281564	TRUE	3	30	1	84.3123
A12	T16	GAPDH	UNKNOWN	SYBR	None	0.0790685	0.0148508	0.420976	35.9373	35.3956	-0.266993	0.86894	3.66075	TRUE	0.281564	TRUE	3	31	1	84.3123
B10	N16	GAPDH	UNKNOWN	SYBR	None	1			31.3896	31.5958	-3.92775		0	TRUE	0.281564	TRUE	3	26	1	84.7076
B11	N16	GAPDH	UNKNOWN	SYBR	None	1			31.6248	31.5958	-3.92775		0	TRUE	0.281564	TRUE	3	25	1	84.7076
B12	N16	GAPDH	UNKNOWN	SYBR	None	1			31.7731	31.5958	-3.92775		0	TRUE	0.281564	TRUE	3	26	1	84.5099
C10	T18	GAPDH	UNKNOWN	SYBR	None	0.388418	0.227132	0.664233	32.5506	32.5068	-2.56343	0.278802	1.36432	TRUE	0.281564	TRUE	3	27	1	84.7076
C11	T18	GAPDH	UNKNOWN	SYBR	None	0.388418	0.227132	0.664233	32.2035	32.5068	-2.56343	0.278802	1.36432	TRUE	0.281564	TRUE	3	26	1	84.7076
C12	T18	GAPDH	UNKNOWN	SYBR	None	0.388418	0.227132	0.664233	32.7663	32.5068	-2.56343	0.278802	1.36432	TRUE	0.281564	TRUE	3	27	1	84.5099
D10	N18	GAPDH	UNKNOWN	SYBR	None	1.31493	0.449279	3.84847	29.9651	30.1694	-4.32273	0.558016	-0.394983	TRUE	0.281564	TRUE	3	24	1	84.9053
D11	N18	GAPDH	UNKNOWN	SYBR	None	1.31493	0.449279	3.84847	30.1664	30.1694	-4.32273	0.558016	-0.394983	TRUE	0.281564	TRUE	3	25	1	84.7076
D12	N18	GAPDH	UNKNOWN	SYBR	None	1.31493	0.449279	3.84847	30.3767	30.1694	-4.32273	0.558016	-0.394983	TRUE	0.281564	TRUE	3	25	1	84.5099
E10	T19	GAPDH	UNKNOWN	SYBR	None	0.165119	0.105147	0.259298	29.1191	29.1874	-1.32932	0.234509	2.59842	TRUE	0.281564	TRUE	3	23	1	85.1029
E11	T19	GAPDH	UNKNOWN	SYBR	None	0.165119	0.105147	0.259298	29.0442	29.1874	-1.32932	0.234509	2.59842	TRUE	0.281564	TRUE	3	23	1	84.9053
E12	T19	GAPDH	UNKNOWN	SYBR	None	0.165119	0.105147	0.259298	29.3988	29.1874	-1.32932	0.234509	2.59842	TRUE	0.281564	TRUE	3	23	1	84.5099
F10	N19	GAPDH	UNKNOWN	SYBR	None	0.425678	0.206056	0.879379	29.8495	29.9897	-2.69558	0.377001	1.23217	TRUE	0.281564	TRUE	3	24	1	84.9053
F11	N19	GAPDH	UNKNOWN	SYBR	None	0.425678	0.206056	0.879379	30.1088	29.9897	-2.69558	0.377001	1.23217	TRUE	0.281564	TRUE	3	25	1	84.7076
F12	N19	GAPDH	UNKNOWN	SYBR	None	0.425678	0.206056	0.879379	30.011	29.9897	-2.69558	0.377001	1.23217	TRUE	0.281564	TRUE	3	24	1	84.5099
G10	T21	GAPDH	UNKNOWN	SYBR	None	0.14778	0.0831109	0.262769	33.6058	33.4161	-1.16927	0.299067	2.75848	TRUE	0.281564	TRUE	3	28	1	84.5099
G11	T21	GAPDH	UNKNOWN	SYBR	None	0.14778	0.0831109	0.262769	33.579	33.4161	-1.16927	0.299067	2.75848	TRUE	0.281564	TRUE	3	28	1	84.5099
G12	T21	GAPDH	UNKNOWN	SYBR	None	0.14778	0.0831109	0.262769	33.0635	33.4161	-1.16927	0.299067	2.75848	TRUE	0.281564	TRUE	3	26	1	84.3123
H10	N21	GAPDH	UNKNOWN	SYBR	None	0.351717	0.182705	0.677074	30.7642	30.9012	-2.42023	0.340326	1.50751	TRUE	0.281564	TRUE	3	24	1	84.5099
H11	N21	GAPDH	UNKNOWN	SYBR	None	0.351717	0.182705	0.677074	31.0358	30.9012	-2.42023	0.340326	1.50751	TRUE	0.281564	TRUE	3	25	1	84.3123
H12	N21	GAPDH	UNKNOWN	SYBR	None	0.351717	0.182705	0.677074	30.9035	30.9012	-2.42023	0.340326	1.50751	TRUE	0.281564	TRUE	3	26	1	84.3123
A4	T4	BZRAP1-AS1	UNKNOWN	SYBR	None				35.1323	35.7413				TRUE	0.375472	TRUE	3	29	1	89.8468
A5	T4	BZRAP1-AS1	UNKNOWN	SYBR	None				36.9551	35.7413				TRUE	0.375472	TRUE	3	31	1	89.8468
A6	T4	BZRAP1-AS1	UNKNOWN	SYBR	None				35.1365	35.7413				TRUE	0.375472	TRUE	3	28	1	89.8468
B4	N4	BZRAP1-AS1	UNKNOWN	SYBR	None				30.075	30.2001	-5.43882	1.36364		TRUE	0.375472	TRUE	3	24	1	90.0444
B5	N4	BZRAP1-AS1	UNKNOWN	SYBR	None				30.0328	30.2001	-5.43882	1.36364		TRUE	0.375472	TRUE	3	23	1	90.0444
B6	N4	BZRAP1-AS1	UNKNOWN	SYBR	None				30.4925	30.2001	-5.43882	1.36364		TRUE	0.375472	TRUE	3	25	1	90.0444
C4	T5	BZRAP1-AS1	UNKNOWN	SYBR	None				31.6503	31.9803				TRUE	0.375472	TRUE	3	25	1	90.2421
C5	T5	BZRAP1-AS1	UNKNOWN	SYBR	None				31.9254	31.9803				TRUE	0.375472	TRUE	3	26	1	90.2421
C6	T5	BZRAP1-AS1	UNKNOWN	SYBR	None				32.3653	31.9803				TRUE	0.375472	TRUE	3	26	1	90.2421
D4	N5	BZRAP1-AS1	UNKNOWN	SYBR	None				29.6957	29.8493	5.16126	10.0623		TRUE	0.375472	TRUE	3	23	1	90.4398
D5	N5	BZRAP1-AS1	UNKNOWN	SYBR	None				29.9062	29.8493	5.16126	10.0623		TRUE	0.375472	TRUE	3	24	1	90.4398
D6	N5	BZRAP1-AS1	UNKNOWN	SYBR	None				29.946	29.8493	5.16126	10.0623		TRUE	0.375472	TRUE	3	24	1	90.2421
E4	T6	BZRAP1-AS1	UNKNOWN	SYBR	None				35.8712	35.6971				TRUE	0.375472	TRUE	3	30	1	90.2421
E5	T6	BZRAP1-AS1	UNKNOWN	SYBR	None				35.3167	35.6971				TRUE	0.375472	TRUE	3	29	1	90.2421
E6	T6	BZRAP1-AS1	UNKNOWN	SYBR	None				35.9035	35.6971				TRUE	0.375472	TRUE	3	30	1	90.2421
F4	N6	BZRAP1-AS1	UNKNOWN	SYBR	None				31.3009	31.3194				TRUE	0.375472	TRUE	3	26	1	90.2421
F5	N6	BZRAP1-AS1	UNKNOWN	SYBR	None				31.3522	31.3194				TRUE	0.375472	TRUE	3	24	1	90.2421
F6	N6	BZRAP1-AS1	UNKNOWN	SYBR	None				31.3051	31.3194				TRUE	0.375472	TRUE	3	25	1	90.2421
G1	T4	GAPDH	UNKNOWN	SYBR	None				24.2047	24.2397				TRUE	0.350817	TRUE	3	17	1	82.3357
G2	T4	GAPDH	UNKNOWN	SYBR	None				24.2027	24.2397				TRUE	0.350817	TRUE	3	17	1	82.5333
G3	T4	GAPDH	UNKNOWN	SYBR	None				24.3117	24.2397				TRUE	0.350817	TRUE	3	18	1	82.5333
G4	T5	GAPDH	UNKNOWN	SYBR	None				21.4939	21.6234				TRUE	0.350817	TRUE	3	15	1	82.5333
G5	T5	GAPDH	UNKNOWN	SYBR	None				21.4968	21.6234				TRUE	0.350817	TRUE	3	15	1	82.5333
G6	T5	GAPDH	UNKNOWN	SYBR	None				21.8796	21.6234				TRUE	0.350817	TRUE	3	15	1	82.5333
G7	T6	GAPDH	UNKNOWN	SYBR	None				24.9267	24.9203				TRUE	0.350817	TRUE	3	19	1	82.5333
G8	T6	GAPDH	UNKNOWN	SYBR	None				25.0675	24.9203				TRUE	0.350817	TRUE	3	19	1	82.3357
G9	T6	GAPDH	UNKNOWN	SYBR	None				24.7666	24.9203				TRUE	0.350817	TRUE	3	19	1	82.3357
H1	N4	GAPDH	UNKNOWN	SYBR	None				25.6812	25.6389	-9.99996	1.35627		TRUE	0.350817	TRUE	3	19	1	82.138
H2	N4	GAPDH	UNKNOWN	SYBR	None				25.5621	25.6389	-9.99996	1.35627		TRUE	0.350817	TRUE	3	19	1	82.138
H3	N4	GAPDH	UNKNOWN	SYBR	None				25.6735	25.6389	-9.99996	1.35627		TRUE	0.350817	TRUE	3	19	1	82.138
H4	N5	GAPDH	UNKNOWN	SYBR	None				24.7427	24.8493	0.161232	10.0622		TRUE	0.350817	TRUE	3	19	1	82.3357
H5	N5	GAPDH	UNKNOWN	SYBR	None				24.8469	24.8493	0.161232	10.0622		TRUE	0.350817	TRUE	3	18	1	82.3357
H6	N5	GAPDH	UNKNOWN	SYBR	None				24.9582	24.8493	0.161232	10.0622		TRUE	0.350817	TRUE	3	19	1	82.3357
H7	N6	GAPDH	UNKNOWN	SYBR	None				24.5849	24.7275				TRUE	0.350817	TRUE	3	18	1	82.3357
H8	N6	GAPDH	UNKNOWN	SYBR	None				24.9341	24.7275				TRUE	0.350817	TRUE	3	19	1	82.138
H9	N6	GAPDH	UNKNOWN	SYBR	None				24.6636	24.7275				TRUE	0.350817	TRUE	3	19	1	82.138
A7	T56	BZRAP1-AS1	UNKNOWN	SYBR	None	5.38573	3.09348	9.37655	31.9308	31.7772	-3.15267	0.251352	-2.42914	TRUE	0.193736	TRUE	3	27	1	89.8827
A8	T56	BZRAP1-AS1	UNKNOWN	SYBR	None	5.38573	3.09348	9.37655	31.5751	31.7772	-3.15267	0.251352	-2.42914	TRUE	0.193736	TRUE	3	26	1	89.8827
A9	T56	BZRAP1-AS1	UNKNOWN	SYBR	None	5.38573	3.09348	9.37655	31.8255	31.7772	-3.15267	0.251352	-2.42914	TRUE	0.193736	TRUE	3	27	1	89.8827
B7	N56	BZRAP1-AS1	UNKNOWN	SYBR	None	1	0.23189	4.31239	35.3574	34.021	-0.723529	0.75942	0	TRUE	0.193736	TRUE	3	31	1	90.0698
B8	N56	BZRAP1-AS1	UNKNOWN	SYBR	None	1	0.23189	4.31239	33.7917	34.021	-0.723529	0.75942	0	TRUE	0.193736	TRUE	3	29	1	90.0698
B9	N56	BZRAP1-AS1	UNKNOWN	SYBR	None	1	0.23189	4.31239	32.9138	34.021	-0.723529	0.75942	0	TRUE	0.193736	TRUE	3	29	1	89.8827
C7	T58	BZRAP1-AS1	UNKNOWN	SYBR	None	2.84854	0.401122	20.2286	32.5094	32.6289	-2.23375	0.657294	-1.51022	TRUE	0.193736	TRUE	3	27	1	90.257
C9	T58	BZRAP1-AS1	UNKNOWN	SYBR	None	2.84854	0.401122	20.2286	32.7483	32.6289	-2.23375	0.657294	-1.51022	TRUE	0.193736	TRUE	3	29	1	90.0698
D7	N58	BZRAP1-AS1	UNKNOWN	SYBR	None	10.4978			32.1238	31.8939	-4.11555		-3.39202	TRUE	0.193736	TRUE	3	27	1	90.4441
D8	N58	BZRAP1-AS1	UNKNOWN	SYBR	None	10.4978			31.664	31.8939	-4.11555		-3.39202	TRUE	0.193736	TRUE	3	27	1	90.257
E7	T59	BZRAP1-AS1	UNKNOWN	SYBR	None	0.0683544	0.0158008	0.295702	35.0814	34.7655	3.14729	0.761059	3.87082	TRUE	0.193736	TRUE	3	31	1	90.4441
E8	T59	BZRAP1-AS1	UNKNOWN	SYBR	None	0.0683544	0.0158008	0.295702	33.3433	34.7655	3.14729	0.761059	3.87082	TRUE	0.193736	TRUE	3	28	1	78.8408
E9	T59	BZRAP1-AS1	UNKNOWN	SYBR	None	0.0683544	0.0158008	0.295702	35.8717	34.7655	3.14729	0.761059	3.87082	TRUE	0.193736	TRUE	3	31	1	77.5307
F8	N59	BZRAP1-AS1	UNKNOWN	SYBR	None	1.24886	0.0645108	24.1767	36.9513	35.9579	-1.04414	0.993557	-0.320615	TRUE	0.193736	TRUE	3	32	1	77.905
F9	N59	BZRAP1-AS1	UNKNOWN	SYBR	None	1.24886	0.0645108	24.1767	34.9644	35.9579	-1.04414	0.993557	-0.320615	TRUE	0.193736	TRUE	3	31	1	90.0698
G1	T56	GAPDH	UNKNOWN	SYBR	None	0.153673	0.075798	0.311559	34.7472	34.34	-0.589809	0.320394	2.70206	TRUE	0.429843	TRUE	3	29	1	84.6425
G2	T56	GAPDH	UNKNOWN	SYBR	None	0.153673	0.075798	0.311559	33.9708	34.34	-0.589809	0.320394	2.70206	TRUE	0.429843	TRUE	3	28	1	84.8296
G3	T56	GAPDH	UNKNOWN	SYBR	None	0.153673	0.075798	0.311559	34.302	34.34	-0.589809	0.320394	2.70206	TRUE	0.429843	TRUE	3	28	1	84.8296
G4	T58	GAPDH	UNKNOWN	SYBR	None	0.142665	0.0330315	0.616179	34.1067	34.38	-0.482571	0.663238	2.8093	TRUE	0.429843	TRUE	3	28	1	84.8296
G5	T58	GAPDH	UNKNOWN	SYBR	None	0.142665	0.0330315	0.616179	34.6185	34.38	-0.482571	0.663238	2.8093	TRUE	0.429843	TRUE	3	28	1	85.0168
G6	T58	GAPDH	UNKNOWN	SYBR	None	0.142665	0.0330315	0.616179	34.4149	34.38	-0.482571	0.663238	2.8093	TRUE	0.429843	TRUE	3	28	1	85.0168
G7	T59	GAPDH	UNKNOWN	SYBR	None	0.299442	0.224252	0.399844	30.0666	30.066	-1.55222	0.150249	1.73965	TRUE	0.429843	TRUE	3	24	1	85.2039
G8	T59	GAPDH	UNKNOWN	SYBR	None	0.299442	0.224252	0.399844	30.1217	30.066	-1.55222	0.150249	1.73965	TRUE	0.429843	TRUE	3	24	1	85.0168
G9	T59	GAPDH	UNKNOWN	SYBR	None	0.299442	0.224252	0.399844	30.0096	30.066	-1.55222	0.150249	1.73965	TRUE	0.429843	TRUE	3	24	1	85.2039
H1	N56	GAPDH	UNKNOWN	SYBR	None	1	0.594946	1.68082	31.6135	31.4526	-3.29187	0.26983	0	TRUE	0.429843	TRUE	3	25	1	84.8296
H2	N56	GAPDH	UNKNOWN	SYBR	None	1	0.594946	1.68082	31.4031	31.4526	-3.29187	0.26983	0	TRUE	0.429843	TRUE	3	25	1	84.8296
H3	N56	GAPDH	UNKNOWN	SYBR	None	1	0.594946	1.68082	31.3413	31.4526	-3.29187	0.26983	0	TRUE	0.429843	TRUE	3	26	1	84.8296
H4	N58	GAPDH	UNKNOWN	SYBR	None	0.258756			34.3883	34.6679	-1.34153		1.95034	TRUE	0.429843	TRUE	3	28	1	84.6425
H5	N58	GAPDH	UNKNOWN	SYBR	None	0.258756			34.9507	34.6679	-1.34153		1.95034	TRUE	0.429843	TRUE	3	29	1	84.8296
H6	N58	GAPDH	UNKNOWN	SYBR	None	0.258756			34.6648	34.6679	-1.34153		1.95034	TRUE	0.429843	TRUE	3	29	1	84.8296
H7	N59	GAPDH	UNKNOWN	SYBR	None	0.660566	0.442724	0.985598	34.2095	34.3084	-2.69364	0.1814	0.598225	TRUE	0.429843	TRUE	3	28	1	84.8296
H8	N59	GAPDH	UNKNOWN	SYBR	None	0.660566	0.442724	0.985598	34.0565	34.3084	-2.69364	0.1814	0.598225	TRUE	0.429843	TRUE	3	28	1	84.8296
H9	N59	GAPDH	UNKNOWN	SYBR	None	0.660566	0.442724	0.985598	34.6591	34.3084	-2.69364	0.1814	0.598225	TRUE	0.429843	TRUE	3	28	1	84.6425
A7	T9	BZRAP1-AS1	UNKNOWN	SYBR	None	1	0.675249	1.48093	35.673	35.7867	2.27434	0.17801	0	TRUE	0.305899	TRUE	3	30	1	89.8734
A8	T9	BZRAP1-AS1	UNKNOWN	SYBR	None	1	0.675249	1.48093	35.9004	35.7867	2.27434	0.17801	0	TRUE	0.305899	TRUE	3	30	1	89.8734
B8	N9	BZRAP1-AS1	UNKNOWN	SYBR	None	10.5145			34.579	34.6727	-1.11996		-3.3943	TRUE	0.305899	TRUE	3	29	1	90.0647
B9	N9	BZRAP1-AS1	UNKNOWN	SYBR	None	10.5145			34.7665	34.6727	-1.11996		-3.3943	TRUE	0.305899	TRUE	3	29	1	90.0647
C7	T53	BZRAP1-AS1	UNKNOWN	SYBR	None	0.765721	0.18257	3.21153	33.3329	34.38	2.65945	0.744971	0.38511	TRUE	0.305899	TRUE	3	28	1	90.2561
C8	T53	BZRAP1-AS1	UNKNOWN	SYBR	None	0.765721	0.18257	3.21153	34.0271	34.38	2.65945	0.744971	0.38511	TRUE	0.305899	TRUE	3	29	1	90.2561
C9	T53	BZRAP1-AS1	UNKNOWN	SYBR	None	0.765721	0.18257	3.21153	35.7799	34.38	2.65945	0.744971	0.38511	TRUE	0.305899	TRUE	3	31	1	90.0647
D7	N53	BZRAP1-AS1	UNKNOWN	SYBR	None	3.30679	1.26503	8.64396	35.1162	34.3413	0.548907	0.499293	-1.72543	TRUE	0.305899	TRUE	3	29	1	90.2561
D8	N53	BZRAP1-AS1	UNKNOWN	SYBR	None	3.30679	1.26503	8.64396	34.1452	34.3413	0.548907	0.499293	-1.72543	TRUE	0.305899	TRUE	3	28	1	90.2561
D9	N53	BZRAP1-AS1	UNKNOWN	SYBR	None	3.30679	1.26503	8.64396	33.7624	34.3413	0.548907	0.499293	-1.72543	TRUE	0.305899	TRUE	3	28	1	90.2561
E7	T54	BZRAP1-AS1	UNKNOWN	SYBR	None	10.4494	6.557	16.6525	32.5341	32.182	-1.11101	0.242149	-3.38535	TRUE	0.305899	TRUE	3	27	1	90.4474
E8	T54	BZRAP1-AS1	UNKNOWN	SYBR	None	10.4494	6.557	16.6525	32.0625	32.182	-1.11101	0.242149	-3.38535	TRUE	0.305899	TRUE	3	27	1	90.2561
E9	T54	BZRAP1-AS1	UNKNOWN	SYBR	None	10.4494	6.557	16.6525	31.9496	32.182	-1.11101	0.242149	-3.38535	TRUE	0.305899	TRUE	3	26	1	90.2561
F7	N54	BZRAP1-AS1	UNKNOWN	SYBR	None	25.2933	13.8996	46.0265	31.4873	31.7573	-2.38634	0.311085	-4.66068	TRUE	0.305899	TRUE	3	26	1	90.2561
F8	N54	BZRAP1-AS1	UNKNOWN	SYBR	None	25.2933	13.8996	46.0265	31.8043	31.7573	-2.38634	0.311085	-4.66068	TRUE	0.305899	TRUE	3	26	1	90.2561
F9	N54	BZRAP1-AS1	UNKNOWN	SYBR	None	25.2933	13.8996	46.0265	31.9804	31.7573	-2.38634	0.311085	-4.66068	TRUE	0.305899	TRUE	3	27	1	90.0647
G1	T9	GAPDH	UNKNOWN	SYBR	None	1	0.745411	1.34154	32.6381	32.7686	-0.74371	0.152674	0	TRUE	0.438549	TRUE	3	27	1	84.8988
G2	T9	GAPDH	UNKNOWN	SYBR	None	1	0.745411	1.34154	32.8632	32.7686	-0.74371	0.152674	0	TRUE	0.438549	TRUE	3	27	1	85.0902
G3	T9	GAPDH	UNKNOWN	SYBR	None	1	0.745411	1.34154	32.8046	32.7686	-0.74371	0.152674	0	TRUE	0.438549	TRUE	3	27	1	85.0902
G4	T53	GAPDH	UNKNOWN	SYBR	None	0.67608	0.495627	0.922235	31.5825	31.5415	-0.178976	0.161336	0.564734	TRUE	0.438549	TRUE	3	26	1	85.0902
G5	T53	GAPDH	UNKNOWN	SYBR	None	0.67608	0.495627	0.922235	31.5676	31.5415	-0.178976	0.161336	0.564734	TRUE	0.438549	TRUE	3	26	1	85.0902
G6	T53	GAPDH	UNKNOWN	SYBR	None	0.67608	0.495627	0.922235	31.4744	31.5415	-0.178976	0.161336	0.564734	TRUE	0.438549	TRUE	3	25	1	85.0902
G7	T54	GAPDH	UNKNOWN	SYBR	None	0.454586	0.281512	0.734065	33.9661	33.6867	0.393665	0.249007	1.13737	TRUE	0.438549	TRUE	3	28	1	84.8988
G8	T54	GAPDH	UNKNOWN	SYBR	None	0.454586	0.281512	0.734065	33.3286	33.6867	0.393665	0.249007	1.13737	TRUE	0.438549	TRUE	3	28	1	84.8988
G9	T54	GAPDH	UNKNOWN	SYBR	None	0.454586	0.281512	0.734065	33.7655	33.6867	0.393665	0.249007	1.13737	TRUE	0.438549	TRUE	3	28	1	84.8988
H1	N9	GAPDH	UNKNOWN	SYBR	None	0.962834			34.8547	35.1036	-0.689069		0.0546405	TRUE	0.438549	TRUE	3	29	1	84.5162
H2	N9	GAPDH	UNKNOWN	SYBR	None	0.962834			35.5692	35.1036	-0.689069		0.0546405	TRUE	0.438549	TRUE	3	29	1	84.5162
H3	N9	GAPDH	UNKNOWN	SYBR	None	0.962834			34.887	35.1036	-0.689069		0.0546405	TRUE	0.438549	TRUE	3	28	1	84.7075
H4	N53	GAPDH	UNKNOWN	SYBR	None	1.1081	0.626071	1.96125	32.9251	32.9006	-0.891796	0.29667	-0.148087	TRUE	0.438549	TRUE	3	27	1	84.8988
H5	N53	GAPDH	UNKNOWN	SYBR	None	1.1081	0.626071	1.96125	32.9404	32.9006	-0.891796	0.29667	-0.148087	TRUE	0.438549	TRUE	3	28	1	84.8988
H6	N53	GAPDH	UNKNOWN	SYBR	None	1.1081	0.626071	1.96125	32.8362	32.9006	-0.891796	0.29667	-0.148087	TRUE	0.438549	TRUE	3	27	1	84.8988
H7	N54	GAPDH	UNKNOWN	SYBR	None	1.06628	0.602313	1.88766	33.4888	33.3074	-0.836301	0.296785	-0.0925916	TRUE	0.438549	TRUE	3	28	1	84.8988
H8	N54	GAPDH	UNKNOWN	SYBR	None	1.06628	0.602313	1.88766	33.3247	33.3074	-0.836301	0.296785	-0.0925916	TRUE	0.438549	TRUE	3	27	1	84.8988
H9	N54	GAPDH	UNKNOWN	SYBR	None	1.06628	0.602313	1.88766	33.1086	33.3074	-0.836301	0.296785	-0.0925916	TRUE	0.438549	TRUE	3	27	1	84.7075
A7	T48	BZRAP1-AS1	UNKNOWN	SYBR	None	0.173677	0.0897552	0.336067	32.0538	32.3516	1.73298	0.343007	2.52552	TRUE	0.404603	TRUE	3	26	1	90.0632
A8	T48	BZRAP1-AS1	UNKNOWN	SYBR	None	0.173677	0.0897552	0.336067	33.0355	32.3516	1.73298	0.343007	2.52552	TRUE	0.404603	TRUE	3	27	1	89.8667
A9	T48	BZRAP1-AS1	UNKNOWN	SYBR	None	0.173677	0.0897552	0.336067	31.9655	32.3516	1.73298	0.343007	2.52552	TRUE	0.404603	TRUE	3	25	1	89.8667
B7	N48	BZRAP1-AS1	UNKNOWN	SYBR	None	1.35138	0.290999	6.27569	33.1753	33.3578	-1.22697	0.797907	-0.434429	TRUE	0.404603	TRUE	3	27	1	90.0632
B8	N48	BZRAP1-AS1	UNKNOWN	SYBR	None	1.35138	0.290999	6.27569	33.0098	33.3578	-1.22697	0.797907	-0.434429	TRUE	0.404603	TRUE	3	26	1	90.0632
B9	N48	BZRAP1-AS1	UNKNOWN	SYBR	None	1.35138	0.290999	6.27569	33.8883	33.3578	-1.22697	0.797907	-0.434429	TRUE	0.404603	TRUE	3	28	1	89.8667
C8	T55	BZRAP1-AS1	UNKNOWN	SYBR	None	2.46323	0.819906	7.40024	34.369	34.8674	-2.0931	0.49868	-1.30055	TRUE	0.404603	TRUE	3	29	1	90.0632
C9	T55	BZRAP1-AS1	UNKNOWN	SYBR	None	2.46323	0.819906	7.40024	35.3658	34.8674	-2.0931	0.49868	-1.30055	TRUE	0.404603	TRUE	3	30	1	89.8667
D7	N55	BZRAP1-AS1	UNKNOWN	SYBR	None	1	0.316315	3.16141	33.7518	33.4005	-0.792544	0.598092	0	TRUE	0.404603	TRUE	3	28	1	90.4561
D8	N55	BZRAP1-AS1	UNKNOWN	SYBR	None	1	0.316315	3.16141	32.5509	33.4005	-0.792544	0.598092	0	TRUE	0.404603	TRUE	3	27	1	90.2596
D9	N55	BZRAP1-AS1	UNKNOWN	SYBR	None	1	0.316315	3.16141	33.8988	33.4005	-0.792544	0.598092	0	TRUE	0.404603	TRUE	3	27	1	90.0632
E7	T57	BZRAP1-AS1	UNKNOWN	SYBR	None	0.319969	0.0607964	1.68398	35.8032	35.0785	0.851453	0.75284	1.644	TRUE	0.404603	TRUE	3	30	1	90.4561
E8	T57	BZRAP1-AS1	UNKNOWN	SYBR	None	0.319969	0.0607964	1.68398	Undetermined	35.0785	0.851453	0.75284	1.644	TRUE	0.404603	TRUE	3	35	1	62.1614
E9	T57	BZRAP1-AS1	UNKNOWN	SYBR	None	0.319969	0.0607964	1.68398	34.3539	35.0785	0.851453	0.75284	1.644	TRUE	0.404603	TRUE	3	28	1	90.2596
F7	N57	BZRAP1-AS1	UNKNOWN	SYBR	None	0.543827			34.0141	34.8435	0.0862363		0.87878	TRUE	0.404603	TRUE	3	29	1	90.2596
F8	N57	BZRAP1-AS1	UNKNOWN	SYBR	None	0.543827			35.8117	34.8435	0.0862363		0.87878	TRUE	0.404603	TRUE	3	29	1	90.2596
F9	N57	BZRAP1-AS1	UNKNOWN	SYBR	None	0.543827			34.7045	34.8435	0.0862363		0.87878	TRUE	0.404603	TRUE	3	29	1	90.0632
G1	T48	GAPDH	UNKNOWN	SYBR	None	1.37221	1.09388	1.72135	29.1799	29.3543	-1.26433	0.117791	-0.456498	TRUE	0.233284	TRUE	3	24	1	84.9544
G2	T48	GAPDH	UNKNOWN	SYBR	None	1.37221	1.09388	1.72135	29.3053	29.3543	-1.26433	0.117791	-0.456498	TRUE	0.233284	TRUE	3	24	1	85.1509
G3	T48	GAPDH	UNKNOWN	SYBR	None	1.37221	1.09388	1.72135	29.5778	29.3543	-1.26433	0.117791	-0.456498	TRUE	0.233284	TRUE	3	24	1	85.1509
G4	T55	GAPDH	UNKNOWN	SYBR	None	1.59516	0.323216	7.87257	36.972	35.4789	-1.48153	0.829526	-0.673703	TRUE	0.233284	TRUE	3	32	1	84.7579
G5	T55	GAPDH	UNKNOWN	SYBR	None	1.59516	0.323216	7.87257	35.358	35.4789	-1.48153	0.829526	-0.673703	TRUE	0.233284	TRUE	3	30	1	84.9544
G6	T55	GAPDH	UNKNOWN	SYBR	None	1.59516	0.323216	7.87257	34.1067	35.4789	-1.48153	0.829526	-0.673703	TRUE	0.233284	TRUE	3	28	1	84.9544
G7	T57	GAPDH	UNKNOWN	SYBR	None	3.55421	2.36064	5.35127	31.4752	31.5897	-2.63736	0.212629	-1.82953	TRUE	0.233284	TRUE	3	26	1	84.9544
G8	T57	GAPDH	UNKNOWN	SYBR	None	3.55421	2.36064	5.35127	31.676	31.5897	-2.63736	0.212629	-1.82953	TRUE	0.233284	TRUE	3	26	1	84.9544
G9	T57	GAPDH	UNKNOWN	SYBR	None	3.55421	2.36064	5.35127	31.618	31.5897	-2.63736	0.212629	-1.82953	TRUE	0.233284	TRUE	3	26	1	84.7579
H1	N48	GAPDH	UNKNOWN	SYBR	None	2.66315	0.574163	12.3525	32.8875	32.3638	-2.22096	0.797279	-1.41313	TRUE	0.233284	TRUE	3	28	1	84.7579
H2	N48	GAPDH	UNKNOWN	SYBR	None	2.66315	0.574163	12.3525	32.1981	32.3638	-2.22096	0.797279	-1.41313	TRUE	0.233284	TRUE	3	27	1	84.7579
H3	N48	GAPDH	UNKNOWN	SYBR	None	2.66315	0.574163	12.3525	32.0058	32.3638	-2.22096	0.797279	-1.41313	TRUE	0.233284	TRUE	3	27	1	84.9544
H4	N55	GAPDH	UNKNOWN	SYBR	None	1	0.311965	3.20548	32.5235	33.3852	-0.807828	0.605286	0	TRUE	0.233284	TRUE	3	27	1	84.7579
H5	N55	GAPDH	UNKNOWN	SYBR	None	1	0.311965	3.20548	33.6904	33.3852	-0.807828	0.605286	0	TRUE	0.233284	TRUE	3	29	1	84.7579
H6	N55	GAPDH	UNKNOWN	SYBR	None	1	0.311965	3.20548	33.9418	33.3852	-0.807828	0.605286	0	TRUE	0.233284	TRUE	3	29	1	84.5614
H7	N57	GAPDH	UNKNOWN	SYBR	None	4.29323			31.6135	31.8473	-2.90989		-2.10206	TRUE	0.233284	TRUE	3	26	1	84.7579
H8	N57	GAPDH	UNKNOWN	SYBR	None	4.29323			31.8558	31.8473	-2.90989		-2.10206	TRUE	0.233284	TRUE	3	26	1	84.7579
H9	N57	GAPDH	UNKNOWN	SYBR	None	4.29323			32.0727	31.8473	-2.90989		-2.10206	TRUE	0.233284	TRUE	3	26	1	84.5614
A4	T36	BZRAP1-AS1	UNKNOWN	SYBR	None	0.216387	0.144633	0.323738	34.1701	33.934	-0.374327	0.209337	2.20831	TRUE	0.379671	TRUE	3	28	1	89.7118
A5	T36	BZRAP1-AS1	UNKNOWN	SYBR	None	0.216387	0.144633	0.323738	33.7775	33.934	-0.374327	0.209337	2.20831	TRUE	0.379671	TRUE	3	28	1	89.9112
A6	T36	BZRAP1-AS1	UNKNOWN	SYBR	None	0.216387	0.144633	0.323738	33.8543	33.934	-0.374327	0.209337	2.20831	TRUE	0.379671	TRUE	3	28	1	89.9112
B4	N36	BZRAP1-AS1	UNKNOWN	SYBR	None	1.76938	0.897178	3.48951	32.9298	33.1272	-3.40589	0.35289	-0.823245	TRUE	0.379671	TRUE	3	27	1	89.9112
B5	N36	BZRAP1-AS1	UNKNOWN	SYBR	None	1.76938	0.897178	3.48951	33.055	33.1272	-3.40589	0.35289	-0.823245	TRUE	0.379671	TRUE	3	27	1	89.9112
B6	N36	BZRAP1-AS1	UNKNOWN	SYBR	None	1.76938	0.897178	3.48951	33.3967	33.1272	-3.40589	0.35289	-0.823245	TRUE	0.379671	TRUE	3	27	1	90.1106
C4	T37	BZRAP1-AS1	UNKNOWN	SYBR	None	0.17087	0.114786	0.254357	32.3469	32.7494	-0.0336113	0.206724	2.54903	TRUE	0.379671	TRUE	3	26	1	90.1106
C5	T37	BZRAP1-AS1	UNKNOWN	SYBR	None	0.17087	0.114786	0.254357	32.9706	32.7494	-0.0336113	0.206724	2.54903	TRUE	0.379671	TRUE	3	26	1	90.1106
C6	T37	BZRAP1-AS1	UNKNOWN	SYBR	None	0.17087	0.114786	0.254357	32.9306	32.7494	-0.0336113	0.206724	2.54903	TRUE	0.379671	TRUE	3	26	1	90.1106
D4	N37	BZRAP1-AS1	UNKNOWN	SYBR	None	0.626266	0.279827	1.40161	32.9491	33.1634	-1.90749	0.418606	0.675153	TRUE	0.379671	TRUE	3	27	1	90.3101
D5	N37	BZRAP1-AS1	UNKNOWN	SYBR	None	0.626266	0.279827	1.40161	33.0475	33.1634	-1.90749	0.418606	0.675153	TRUE	0.379671	TRUE	3	27	1	90.3101
D6	N37	BZRAP1-AS1	UNKNOWN	SYBR	None	0.626266	0.279827	1.40161	33.4937	33.1634	-1.90749	0.418606	0.675153	TRUE	0.379671	TRUE	3	28	1	90.3101
E4	T39	BZRAP1-AS1	UNKNOWN	SYBR	None	0.465012	0.173219	1.24834	33.5429	34.2165	-1.47798	0.513129	1.10466	TRUE	0.379671	TRUE	3	27	1	90.3101
E5	T39	BZRAP1-AS1	UNKNOWN	SYBR	None	0.465012	0.173219	1.24834	33.9755	34.2165	-1.47798	0.513129	1.10466	TRUE	0.379671	TRUE	3	28	1	90.3101
E6	T39	BZRAP1-AS1	UNKNOWN	SYBR	None	0.465012	0.173219	1.24834	35.1312	34.2165	-1.47798	0.513129	1.10466	TRUE	0.379671	TRUE	3	29	1	90.3101
F4	N39	BZRAP1-AS1	UNKNOWN	SYBR	None	1			33.995	33.6789	-2.58264		0	TRUE	0.379671	TRUE	3	28	1	90.1106
F5	N39	BZRAP1-AS1	UNKNOWN	SYBR	None	1			33.0837	33.6789	-2.58264		0	TRUE	0.379671	TRUE	3	27	1	90.3101
F6	N39	BZRAP1-AS1	UNKNOWN	SYBR	None	1			33.958	33.6789	-2.58264		0	TRUE	0.379671	TRUE	3	27	1	90.3101
A10	T36	GAPDH	UNKNOWN	SYBR	None	0.226733	0.122846	0.418475	35.0962	35.4249	1.11656	0.318445	2.14093	TRUE	0.35384	TRUE	3	28	1	84.3278
A11	T36	GAPDH	UNKNOWN	SYBR	None	0.226733	0.122846	0.418475	35.2218	35.4249	1.11656	0.318445	2.14093	TRUE	0.35384	TRUE	3	29	1	84.3278
A12	T36	GAPDH	UNKNOWN	SYBR	None	0.226733	0.122846	0.418475	35.9567	35.4249	1.11656	0.318445	2.14093	TRUE	0.35384	TRUE	3	29	1	84.1284
B10	N36	GAPDH	UNKNOWN	SYBR	None	2.955	1.51465	5.76507	33.7008	33.9455	-2.58753	0.347271	-1.56316	TRUE	0.35384	TRUE	3	27	1	84.7266
B11	N36	GAPDH	UNKNOWN	SYBR	None	2.955	1.51465	5.76507	34.1092	33.9455	-2.58753	0.347271	-1.56316	TRUE	0.35384	TRUE	3	27	1	84.5272
B12	N36	GAPDH	UNKNOWN	SYBR	None	2.955	1.51465	5.76507	34.0266	33.9455	-2.58753	0.347271	-1.56316	TRUE	0.35384	TRUE	3	28	1	84.3278
C10	T37	GAPDH	UNKNOWN	SYBR	None	1.02083	0.918949	1.134	31.7731	31.7289	-1.05411	0.0546307	-0.0297356	TRUE	0.35384	TRUE	3	25	1	84.7266
C11	T37	GAPDH	UNKNOWN	SYBR	None	1.02083	0.918949	1.134	31.6724	31.7289	-1.05411	0.0546307	-0.0297356	TRUE	0.35384	TRUE	3	26	1	84.7266
C12	T37	GAPDH	UNKNOWN	SYBR	None	1.02083	0.918949	1.134	31.7411	31.7289	-1.05411	0.0546307	-0.0297356	TRUE	0.35384	TRUE	3	25	1	84.5272
D10	N37	GAPDH	UNKNOWN	SYBR	None	1.67732	0.723373	3.8893	33.5218	33.3004	-1.77053	0.437015	-0.74616	TRUE	0.35384	TRUE	3	28	1	84.7266
D11	N37	GAPDH	UNKNOWN	SYBR	None	1.67732	0.723373	3.8893	32.8819	33.3004	-1.77053	0.437015	-0.74616	TRUE	0.35384	TRUE	3	27	1	84.7266
D12	N37	GAPDH	UNKNOWN	SYBR	None	1.67732	0.723373	3.8893	33.4974	33.3004	-1.77053	0.437015	-0.74616	TRUE	0.35384	TRUE	3	28	1	84.5272
E10	T39	GAPDH	UNKNOWN	SYBR	None	6.34337	4.10753	9.79626	32.0391	32.0049	-3.68962	0.225821	-2.66525	TRUE	0.35384	TRUE	3	25	1	84.7266
E11	T39	GAPDH	UNKNOWN	SYBR	None	6.34337	4.10753	9.79626	32.1786	32.0049	-3.68962	0.225821	-2.66525	TRUE	0.35384	TRUE	3	25	1	84.5272
E12	T39	GAPDH	UNKNOWN	SYBR	None	6.34337	4.10753	9.79626	31.7969	32.0049	-3.68962	0.225821	-2.66525	TRUE	0.35384	TRUE	3	26	1	84.3278
F10	N39	GAPDH	UNKNOWN	SYBR	None	1			35.4879	35.2372	-1.02437		0	TRUE	0.35384	TRUE	3	29	1	84.5272
F11	N39	GAPDH	UNKNOWN	SYBR	None	1			35.2008	35.2372	-1.02437		0	TRUE	0.35384	TRUE	3	29	1	84.3278
F12	N39	GAPDH	UNKNOWN	SYBR	None	1			35.0228	35.2372	-1.02437		0	TRUE	0.35384	TRUE	3	29	1	84.1284
A4	T38	BZRAP1-AS1	UNKNOWN	SYBR	None	93.733	59.2739	148.225	28.9521	29.0477	-6.52691	0.238132	-6.55049	TRUE	0.278758	TRUE	3	23	1	89.8225
A5	T38	BZRAP1-AS1	UNKNOWN	SYBR	None	93.733	59.2739	148.225	28.9631	29.0477	-6.52691	0.238132	-6.55049	TRUE	0.278758	TRUE	3	23	1	89.8225
A6	T38	BZRAP1-AS1	UNKNOWN	SYBR	None	93.733	59.2739	148.225	29.2281	29.0477	-6.52691	0.238132	-6.55049	TRUE	0.278758	TRUE	3	23	1	90.0213
B4	N38	BZRAP1-AS1	UNKNOWN	SYBR	None	177.211	145.056	216.493	29.3248	29.4506	-7.44574	0.104037	-7.46932	TRUE	0.278758	TRUE	3	24	1	90.0213
B5	N38	BZRAP1-AS1	UNKNOWN	SYBR	None	177.211	145.056	216.493	29.6565	29.4506	-7.44574	0.104037	-7.46932	TRUE	0.278758	TRUE	3	24	1	90.0213
B6	N38	BZRAP1-AS1	UNKNOWN	SYBR	None	177.211	145.056	216.493	29.3707	29.4506	-7.44574	0.104037	-7.46932	TRUE	0.278758	TRUE	3	23	1	90.0213
C4	T40	BZRAP1-AS1	UNKNOWN	SYBR	None	99.2499	54.9358	179.31	30.0668	30.0354	-6.60941	0.307343	-6.63299	TRUE	0.278758	TRUE	3	25	1	90.2201
C5	T40	BZRAP1-AS1	UNKNOWN	SYBR	None	99.2499	54.9358	179.31	30.1042	30.0354	-6.60941	0.307343	-6.63299	TRUE	0.278758	TRUE	3	24	1	90.2201
C6	T40	BZRAP1-AS1	UNKNOWN	SYBR	None	99.2499	54.9358	179.31	29.9351	30.0354	-6.60941	0.307343	-6.63299	TRUE	0.278758	TRUE	3	24	1	90.2201
D4	N40	BZRAP1-AS1	UNKNOWN	SYBR	None	36.7477	23.3421	57.8521	29.2899	29.3763	-5.176	0.235811	-5.19958	TRUE	0.278758	TRUE	3	24	1	90.4189
D5	N40	BZRAP1-AS1	UNKNOWN	SYBR	None	36.7477	23.3421	57.8521	29.3295	29.3763	-5.176	0.235811	-5.19958	TRUE	0.278758	TRUE	3	24	1	90.4189
D6	N40	BZRAP1-AS1	UNKNOWN	SYBR	None	36.7477	23.3421	57.8521	29.5096	29.3763	-5.176	0.235811	-5.19958	TRUE	0.278758	TRUE	3	24	1	90.4189
E4	T41	BZRAP1-AS1	UNKNOWN	SYBR	None	1	0.423659	2.36039	34.343	34.2201	0.0235799	0.446263	0	TRUE	0.278758	TRUE	3	29	1	90.4189
E5	T41	BZRAP1-AS1	UNKNOWN	SYBR	None	1	0.423659	2.36039	33.4176	34.2201	0.0235799	0.446263	0	TRUE	0.278758	TRUE	3	28	1	90.4189
E6	T41	BZRAP1-AS1	UNKNOWN	SYBR	None	1	0.423659	2.36039	34.8998	34.2201	0.0235799	0.446263	0	TRUE	0.278758	TRUE	3	29	1	90.2201
F4	N41	BZRAP1-AS1	UNKNOWN	SYBR	None	22.2301	11.6483	42.4246	30.7185	30.9413	-4.45086	0.335821	-4.47444	TRUE	0.278758	TRUE	3	25	1	90.2201
F5	N41	BZRAP1-AS1	UNKNOWN	SYBR	None	22.2301	11.6483	42.4246	31.259	30.9413	-4.45086	0.335821	-4.47444	TRUE	0.278758	TRUE	3	25	1	90.2201
F6	N41	BZRAP1-AS1	UNKNOWN	SYBR	None	22.2301	11.6483	42.4246	30.8463	30.9413	-4.45086	0.335821	-4.47444	TRUE	0.278758	TRUE	3	25	1	90.2201
G4	T42	BZRAP1-AS1	UNKNOWN	SYBR	None	8.8076	3.3019	23.4937	31.9157	31.7106	-3.11517	0.509807	-3.13875	TRUE	0.278758	TRUE	3	27	1	90.2201
G5	T42	BZRAP1-AS1	UNKNOWN	SYBR	None	8.8076	3.3019	23.4937	31.4395	31.7106	-3.11517	0.509807	-3.13875	TRUE	0.278758	TRUE	3	26	1	90.2201
G6	T42	BZRAP1-AS1	UNKNOWN	SYBR	None	8.8076	3.3019	23.4937	31.7765	31.7106	-3.11517	0.509807	-3.13875	TRUE	0.278758	TRUE	3	26	1	90.2201
H4	N42	BZRAP1-AS1	UNKNOWN	SYBR	None	1.59799	0.460423	5.54615	35.8965	35.4909	-0.652679	0.646592	-0.676259	TRUE	0.278758	TRUE	3	30	1	90.0213
H5	N42	BZRAP1-AS1	UNKNOWN	SYBR	None	1.59799	0.460423	5.54615	35.408	35.4909	-0.652679	0.646592	-0.676259	TRUE	0.278758	TRUE	3	30	1	90.0213
H6	N42	BZRAP1-AS1	UNKNOWN	SYBR	None	1.59799	0.460423	5.54615	35.1681	35.4909	-0.652679	0.646592	-0.676259	TRUE	0.278758	TRUE	3	29	1	90.0213
A10	T38	GAPDH	UNKNOWN	SYBR	None	0.723766	0.460697	1.13705	34.6805	34.8416	-0.73304	0.234726	0.466405	TRUE	0.265956	TRUE	3	29	1	84.4544
A11	T38	GAPDH	UNKNOWN	SYBR	None	0.723766	0.460697	1.13705	34.9336	34.8416	-0.73304	0.234726	0.466405	TRUE	0.265956	TRUE	3	29	1	84.2556
A12	T38	GAPDH	UNKNOWN	SYBR	None	0.723766	0.460697	1.13705	34.9107	34.8416	-0.73304	0.234726	0.466405	TRUE	0.265956	TRUE	3	29	1	84.2556
B10	N38	GAPDH	UNKNOWN	SYBR	None	2.5696	1.33295	4.95352	33.7759	34.3354	-2.56099	0.341052	-1.36154	TRUE	0.265956	TRUE	3	28	1	84.6533
B11	N38	GAPDH	UNKNOWN	SYBR	None	2.5696	1.33295	4.95352	34.9528	34.3354	-2.56099	0.341052	-1.36154	TRUE	0.265956	TRUE	3	29	1	84.4544
B12	N38	GAPDH	UNKNOWN	SYBR	None	2.5696	1.33295	4.95352	34.2775	34.3354	-2.56099	0.341052	-1.36154	TRUE	0.265956	TRUE	3	28	1	84.2556
C10	T40	GAPDH	UNKNOWN	SYBR	None	1.47091	0.516739	4.187	34.7705	34.8886	-1.75616	0.543575	-0.556713	TRUE	0.265956	TRUE	3	29	1	84.4544
C11	T40	GAPDH	UNKNOWN	SYBR	None	1.47091	0.516739	4.187	35.7226	34.8886	-1.75616	0.543575	-0.556713	TRUE	0.265956	TRUE	3	30	1	84.4544
C12	T40	GAPDH	UNKNOWN	SYBR	None	1.47091	0.516739	4.187	34.1728	34.8886	-1.75616	0.543575	-0.556713	TRUE	0.265956	TRUE	3	29	1	84.2556
D10	N40	GAPDH	UNKNOWN	SYBR	None	2.5809	1.62268	4.10498	31.8506	31.985	-2.56732	0.241135	-1.36788	TRUE	0.265956	TRUE	3	26	1	84.8521
D11	N40	GAPDH	UNKNOWN	SYBR	None	2.5809	1.62268	4.10498	32.1404	31.985	-2.56732	0.241135	-1.36788	TRUE	0.265956	TRUE	3	26	1	84.6533
D12	N40	GAPDH	UNKNOWN	SYBR	None	2.5809	1.62268	4.10498	31.964	31.985	-2.56732	0.241135	-1.36788	TRUE	0.265956	TRUE	3	26	1	84.4544
E10	T41	GAPDH	UNKNOWN	SYBR	None	1	0.71672	1.39524	32.9121	32.9971	-1.19945	0.173069	0	TRUE	0.265956	TRUE	3	27	1	84.8521
E11	T41	GAPDH	UNKNOWN	SYBR	None	1	0.71672	1.39524	33.2576	32.9971	-1.19945	0.173069	0	TRUE	0.265956	TRUE	3	27	1	84.6533
E12	T41	GAPDH	UNKNOWN	SYBR	None	1	0.71672	1.39524	32.8216	32.9971	-1.19945	0.173069	0	TRUE	0.265956	TRUE	3	27	1	84.4544
F10	N41	GAPDH	UNKNOWN	SYBR	None	0.516231	0.265773	1.00272	35.2771	35.1466	-0.245534	0.344982	0.953911	TRUE	0.265956	TRUE	3	29	1	84.6533
F11	N41	GAPDH	UNKNOWN	SYBR	None	0.516231	0.265773	1.00272	35.3742	35.1466	-0.245534	0.344982	0.953911	TRUE	0.265956	TRUE	3	30	1	84.4544
F12	N41	GAPDH	UNKNOWN	SYBR	None	0.516231	0.265773	1.00272	34.7885	35.1466	-0.245534	0.344982	0.953911	TRUE	0.265956	TRUE	3	29	1	84.2556
G10	T42	GAPDH	UNKNOWN	SYBR	None	2.60707	0.924574	7.3513	32.0607	32.2439	-2.58187	0.538663	-1.38243	TRUE	0.265956	TRUE	3	26	1	84.6533
G11	T42	GAPDH	UNKNOWN	SYBR	None	2.60707	0.924574	7.3513	31.9811	32.2439	-2.58187	0.538663	-1.38243	TRUE	0.265956	TRUE	3	26	1	84.6533
G12	T42	GAPDH	UNKNOWN	SYBR	None	2.60707	0.924574	7.3513	32.6898	32.2439	-2.58187	0.538663	-1.38243	TRUE	0.265956	TRUE	3	27	1	84.2556
H10	N42	GAPDH	UNKNOWN	SYBR	None	1.70859	0.482831	6.04619	34.3474	34.1713	-1.97225	0.656674	-0.772808	TRUE	0.265956	TRUE	3	28	1	84.4544
H11	N42	GAPDH	UNKNOWN	SYBR	None	1.70859	0.482831	6.04619	34.4756	34.1713	-1.97225	0.656674	-0.772808	TRUE	0.265956	TRUE	3	29	1	84.2556
H12	N42	GAPDH	UNKNOWN	SYBR	None	1.70859	0.482831	6.04619	33.6909	34.1713	-1.97225	0.656674	-0.772808	TRUE	0.265956	TRUE	3	27	1	84.2556
A4	T1	BZRAP1-AS1	UNKNOWN	SYBR	None				35.3859	35.2975	-1.63339	0.0903589		TRUE	0.355323	TRUE	3	29	1	89.8225
A5	T1	BZRAP1-AS1	UNKNOWN	SYBR	None				35.2091	35.2975	-1.63339	0.0903589		TRUE	0.355323	TRUE	3	29	1	89.8225
A6	T1	BZRAP1-AS1	UNKNOWN	SYBR	None				Undetermined	35.2975	-1.63339	0.0903589		TRUE	0.355323	TRUE	3	39	1	61.7893
B4	N1	BZRAP1-AS1	UNKNOWN	SYBR	None				30.7256	30.57				TRUE	0.355323	TRUE	3	24	1	90.0213
B5	N1	BZRAP1-AS1	UNKNOWN	SYBR	None				30.5013	30.57				TRUE	0.355323	TRUE	3	24	1	90.0213
B6	N1	BZRAP1-AS1	UNKNOWN	SYBR	None				30.4831	30.57				TRUE	0.355323	TRUE	3	24	1	90.0213
C4	T2	BZRAP1-AS1	UNKNOWN	SYBR	None				33.5176	33.1054				TRUE	0.355323	TRUE	3	28	1	90.2201
C5	T2	BZRAP1-AS1	UNKNOWN	SYBR	None				32.9534	33.1054				TRUE	0.355323	TRUE	3	28	1	90.2201
C6	T2	BZRAP1-AS1	UNKNOWN	SYBR	None				32.8453	33.1054				TRUE	0.355323	TRUE	3	27	1	90.2201
D4	N2	BZRAP1-AS1	UNKNOWN	SYBR	None				31.2826	31.4331				TRUE	0.355323	TRUE	3	25	1	90.2201
D5	N2	BZRAP1-AS1	UNKNOWN	SYBR	None				31.4603	31.4331				TRUE	0.355323	TRUE	3	26	1	90.2201
D6	N2	BZRAP1-AS1	UNKNOWN	SYBR	None				31.5564	31.4331				TRUE	0.355323	TRUE	3	25	1	90.2201
E4	T3	BZRAP1-AS1	UNKNOWN	SYBR	None				Undetermined	36.9543				TRUE	0.355323	TRUE	3	39	1	61.9882
E5	T3	BZRAP1-AS1	UNKNOWN	SYBR	None				Undetermined	36.9543				TRUE	0.355323	TRUE	3	39	1	61.9882
E6	T3	BZRAP1-AS1	UNKNOWN	SYBR	None				36.9543	36.9543				TRUE	0.355323	TRUE	3	30	1	90.2201
F4	N3	BZRAP1-AS1	UNKNOWN	SYBR	None				Undetermined					TRUE	0.355323	TRUE	3	39	1	61.9882
F5	N3	BZRAP1-AS1	UNKNOWN	SYBR	None				Undetermined					TRUE	0.355323	TRUE	3	35	1	77.0982
F6	N3	BZRAP1-AS1	UNKNOWN	SYBR	None				Undetermined					TRUE	0.355323	TRUE	3	39	1	61.7893
G1	T1	GAPDH	UNKNOWN	SYBR	None				20.6661	20.7327	-16.1982	0.0496986		TRUE	0.346709	TRUE	3	14	1	82.2675
G2	T1	GAPDH	UNKNOWN	SYBR	None				20.711	20.7327	-16.1982	0.0496986		TRUE	0.346709	TRUE	3	14	1	82.4663
G3	T1	GAPDH	UNKNOWN	SYBR	None				20.8209	20.7327	-16.1982	0.0496986		TRUE	0.346709	TRUE	3	15	1	82.4663
G4	T2	GAPDH	UNKNOWN	SYBR	None				22.8001	22.795				TRUE	0.346709	TRUE	3	17	1	82.6651
G5	T2	GAPDH	UNKNOWN	SYBR	None				22.8431	22.795				TRUE	0.346709	TRUE	3	16	1	82.6651
G6	T2	GAPDH	UNKNOWN	SYBR	None				22.7418	22.795				TRUE	0.346709	TRUE	3	16	1	82.6651
G7	T3	GAPDH	UNKNOWN	SYBR	None				32.7653	32.4626				TRUE	0.346709	TRUE	3	27	1	82.4663
G8	T3	GAPDH	UNKNOWN	SYBR	None				32.6694	32.4626				TRUE	0.346709	TRUE	3	27	1	82.2675
G9	T3	GAPDH	UNKNOWN	SYBR	None				31.9531	32.4626				TRUE	0.346709	TRUE	3	26	1	82.2675
H1	N1	GAPDH	UNKNOWN	SYBR	None				24.6272	24.6096				TRUE	0.346709	TRUE	3	18	1	82.2675
H2	N1	GAPDH	UNKNOWN	SYBR	None				24.6845	24.6096				TRUE	0.346709	TRUE	3	17	1	82.2675
H3	N1	GAPDH	UNKNOWN	SYBR	None				24.5171	24.6096				TRUE	0.346709	TRUE	3	18	1	82.2675
H4	N2	GAPDH	UNKNOWN	SYBR	None				26.4393	26.4847				TRUE	0.346709	TRUE	3	21	1	82.2675
H5	N2	GAPDH	UNKNOWN	SYBR	None				26.5215	26.4847				TRUE	0.346709	TRUE	3	20	1	82.2675
H6	N2	GAPDH	UNKNOWN	SYBR	None				26.4932	26.4847				TRUE	0.346709	TRUE	3	20	1	82.2675
H7	N3	GAPDH	UNKNOWN	SYBR	None				35.957	34.9399				TRUE	0.346709	TRUE	3	30	1	82.0686
H8	N3	GAPDH	UNKNOWN	SYBR	None				34.9004	34.9399				TRUE	0.346709	TRUE	3	28	1	82.0686
H9	N3	GAPDH	UNKNOWN	SYBR	None				33.9624	34.9399				TRUE	0.346709	TRUE	3	29	1	82.0686
A4	T7	BZRAP1-AS1	UNKNOWN	SYBR	None				34.2844	34.7636				TRUE	0.43645	TRUE	3	28	1	89.8468
A5	T7	BZRAP1-AS1	UNKNOWN	SYBR	None				34.7626	34.7636				TRUE	0.43645	TRUE	3	28	1	89.8468
A6	T7	BZRAP1-AS1	UNKNOWN	SYBR	None				35.2439	34.7636				TRUE	0.43645	TRUE	3	28	1	89.8468
B4	N7	BZRAP1-AS1	UNKNOWN	SYBR	None				30.9458	30.775				TRUE	0.43645	TRUE	3	24	1	90.0444
B5	N7	BZRAP1-AS1	UNKNOWN	SYBR	None				30.4644	30.775				TRUE	0.43645	TRUE	3	24	1	90.0444
B6	N7	BZRAP1-AS1	UNKNOWN	SYBR	None				30.915	30.775				TRUE	0.43645	TRUE	3	24	1	90.0444
C4	T8	BZRAP1-AS1	UNKNOWN	SYBR	None				31.4767	31.6224	-2.53582			TRUE	0.43645	TRUE	3	25	1	90.2421
C5	T8	BZRAP1-AS1	UNKNOWN	SYBR	None				31.7448	31.6224	-2.53582			TRUE	0.43645	TRUE	3	25	1	90.2421
C6	T8	BZRAP1-AS1	UNKNOWN	SYBR	None				31.6455	31.6224	-2.53582			TRUE	0.43645	TRUE	3	25	1	90.2421
D4	N8	BZRAP1-AS1	UNKNOWN	SYBR	None				28.8696	28.991	-7.28638	0.770089		TRUE	0.43645	TRUE	3	23	1	90.2421
D5	N8	BZRAP1-AS1	UNKNOWN	SYBR	None				29.1288	28.991	-7.28638	0.770089		TRUE	0.43645	TRUE	3	22	1	90.2421
D6	N8	BZRAP1-AS1	UNKNOWN	SYBR	None				28.9745	28.991	-7.28638	0.770089		TRUE	0.43645	TRUE	3	22	1	90.2421
E4	T10	BZRAP1-AS1	UNKNOWN	SYBR	None				33.6225	33.9051				TRUE	0.43645	TRUE	3	28	1	90.2421
E5	T10	BZRAP1-AS1	UNKNOWN	SYBR	None				34.3098	33.9051				TRUE	0.43645	TRUE	3	27	1	90.2421
E6	T10	BZRAP1-AS1	UNKNOWN	SYBR	None				33.7831	33.9051				TRUE	0.43645	TRUE	3	27	1	90.2421
F4	N10	BZRAP1-AS1	UNKNOWN	SYBR	None				32.3964	32.7132				TRUE	0.43645	TRUE	3	26	1	90.2421
F5	N10	BZRAP1-AS1	UNKNOWN	SYBR	None				32.9462	32.7132				TRUE	0.43645	TRUE	3	26	1	90.2421
F6	N10	BZRAP1-AS1	UNKNOWN	SYBR	None				32.7969	32.7132				TRUE	0.43645	TRUE	3	26	1	90.2421
G1	T7	GAPDH	UNKNOWN	SYBR	None				24.3798	24.3191				TRUE	0.477333	TRUE	3	17	1	82.3357
G2	T7	GAPDH	UNKNOWN	SYBR	None				24.4463	24.3191				TRUE	0.477333	TRUE	3	17	1	82.3357
G3	T7	GAPDH	UNKNOWN	SYBR	None				24.1313	24.3191				TRUE	0.477333	TRUE	3	18	1	82.5333
G4	T8	GAPDH	UNKNOWN	SYBR	None				21.5452	21.5747	-12.5835			TRUE	0.477333	TRUE	3	14	1	82.5333
G5	T8	GAPDH	UNKNOWN	SYBR	None				21.5514	21.5747	-12.5835			TRUE	0.477333	TRUE	3	15	1	82.5333
G6	T8	GAPDH	UNKNOWN	SYBR	None				21.6275	21.5747	-12.5835			TRUE	0.477333	TRUE	3	15	1	82.5333
G7	T10	GAPDH	UNKNOWN	SYBR	None				22.4858	22.471				TRUE	0.477333	TRUE	3	16	1	82.5333
G8	T10	GAPDH	UNKNOWN	SYBR	None				22.4145	22.471				TRUE	0.477333	TRUE	3	16	1	82.3357
G9	T10	GAPDH	UNKNOWN	SYBR	None				22.5127	22.471				TRUE	0.477333	TRUE	3	16	1	82.3357
H1	N7	GAPDH	UNKNOWN	SYBR	None				24.8807	25.4451				TRUE	0.477333	TRUE	3	18	1	82.138
H2	N7	GAPDH	UNKNOWN	SYBR	None				25.5579	25.4451				TRUE	0.477333	TRUE	3	19	1	82.138
H3	N7	GAPDH	UNKNOWN	SYBR	None				25.8967	25.4451				TRUE	0.477333	TRUE	3	19	1	82.138
H4	N8	GAPDH	UNKNOWN	SYBR	None				28.2555	28.278	-7.99931	0.768729		TRUE	0.477333	TRUE	3	21	1	81.7427
H5	N8	GAPDH	UNKNOWN	SYBR	None				28.391	28.278	-7.99931	0.768729		TRUE	0.477333	TRUE	3	21	1	81.7427
H6	N8	GAPDH	UNKNOWN	SYBR	None				28.1876	28.278	-7.99931	0.768729		TRUE	0.477333	TRUE	3	21	1	81.7427
H7	N10	GAPDH	UNKNOWN	SYBR	None				26.7226	26.8507				TRUE	0.477333	TRUE	3	20	1	82.3357
H8	N10	GAPDH	UNKNOWN	SYBR	None				26.936	26.8507				TRUE	0.477333	TRUE	3	20	1	82.138
H9	N10	GAPDH	UNKNOWN	SYBR	None				26.8934	26.8507				TRUE	0.477333	TRUE	3	20	1	81.9404
A4	T11	BZRAP1-AS1	UNKNOWN	SYBR	None	1.17062	0.509625	2.68893	34.9369	34.135	1.49847	0.432122	-0.227271	TRUE	0.2	TRUE	3	15	1
A5	T11	BZRAP1-AS1	UNKNOWN	SYBR	None	1.17062	0.509625	2.68893	33.5825	34.135	1.49847	0.432122	-0.227271	TRUE	0.2	TRUE	3	15	1
A6	T11	BZRAP1-AS1	UNKNOWN	SYBR	None	1.17062	0.509625	2.68893	33.8856	34.135	1.49847	0.432122	-0.227271	TRUE	0.2	TRUE	3	15	1
B4	N11	BZRAP1-AS1	UNKNOWN	SYBR	None	1	0.815998	1.22549	31.3482	31.4138	1.72574	0.105661	0	TRUE	0.2	TRUE	3	15	1
B5	N11	BZRAP1-AS1	UNKNOWN	SYBR	None	1	0.815998	1.22549	31.2982	31.4138	1.72574	0.105661	0	TRUE	0.2	TRUE	3	15	1
B6	N11	BZRAP1-AS1	UNKNOWN	SYBR	None	1	0.815998	1.22549	31.595	31.4138	1.72574	0.105661	0	TRUE	0.2	TRUE	3	15	1
C4	T12	BZRAP1-AS1	UNKNOWN	SYBR	None	1.40843	0.960354	2.06558	32.6814	32.8932	1.23164	0.198979	-0.494092	TRUE	0.2	TRUE	3	15	1
C5	T12	BZRAP1-AS1	UNKNOWN	SYBR	None	1.40843	0.960354	2.06558	33.0563	32.8932	1.23164	0.198979	-0.494092	TRUE	0.2	TRUE	3	15	1
C6	T12	BZRAP1-AS1	UNKNOWN	SYBR	None	1.40843	0.960354	2.06558	32.9417	32.8932	1.23164	0.198979	-0.494092	TRUE	0.2	TRUE	3	15	1
D4	N12	BZRAP1-AS1	UNKNOWN	SYBR	None	0.987978	0.5839	1.67169	33.1206	33.5184	1.74319	0.273283	0.0174497	TRUE	0.2	TRUE	3	15	1
D5	N12	BZRAP1-AS1	UNKNOWN	SYBR	None	0.987978	0.5839	1.67169	33.9405	33.5184	1.74319	0.273283	0.0174497	TRUE	0.2	TRUE	3	15	1
D6	N12	BZRAP1-AS1	UNKNOWN	SYBR	None	0.987978	0.5839	1.67169	33.494	33.5184	1.74319	0.273283	0.0174497	TRUE	0.2	TRUE	3	15	1
E4	T14	BZRAP1-AS1	UNKNOWN	SYBR	None	1.43019	0.415863	4.91853	33.5418	34.4426	1.20953	0.641836	-0.516203	TRUE	0.2	TRUE	3	15	1
E5	T14	BZRAP1-AS1	UNKNOWN	SYBR	None	1.43019	0.415863	4.91853	34.1495	34.4426	1.20953	0.641836	-0.516203	TRUE	0.2	TRUE	3	15	1
E6	T14	BZRAP1-AS1	UNKNOWN	SYBR	None	1.43019	0.415863	4.91853	35.6365	34.4426	1.20953	0.641836	-0.516203	TRUE	0.2	TRUE	3	15	1
F4	N14	BZRAP1-AS1	UNKNOWN	SYBR	None	0.880977	0.709903	1.09328	32.4553	32.3367	1.90856	0.112188	0.182823	TRUE	0.2	TRUE	3	15	1
F5	N14	BZRAP1-AS1	UNKNOWN	SYBR	None	0.880977	0.709903	1.09328	32.323	32.3367	1.90856	0.112188	0.182823	TRUE	0.2	TRUE	3	15	1
F6	N14	BZRAP1-AS1	UNKNOWN	SYBR	None	0.880977	0.709903	1.09328	32.2316	32.3367	1.90856	0.112188	0.182823	TRUE	0.2	TRUE	3	15	1
G1	T11	GAPDH	UNKNOWN	SYBR	None	41.0158	30.9595	54.3385	25.7115	25.762	-6.87458	0.146157	-5.35811	TRUE	0.423505	TRUE	3	19	1	82.4731
G2	T11	GAPDH	UNKNOWN	SYBR	None	41.0158	30.9595	54.3385	25.8723	25.762	-6.87458	0.146157	-5.35811	TRUE	0.423505	TRUE	3	19	1	82.4731
G3	T11	GAPDH	UNKNOWN	SYBR	None	41.0158	30.9595	54.3385	25.7022	25.762	-6.87458	0.146157	-5.35811	TRUE	0.423505	TRUE	3	19	1	82.6667
G4	T12	GAPDH	UNKNOWN	SYBR	None	579.137	410.125	817.799	20.9428	20.9673	-10.6942	0.179309	-9.17776	TRUE	0.423505	TRUE	3	14	1	82.6667
G5	T12	GAPDH	UNKNOWN	SYBR	None	579.137	410.125	817.799	20.8607	20.9673	-10.6942	0.179309	-9.17776	TRUE	0.423505	TRUE	3	14	1	82.8602
G6	T12	GAPDH	UNKNOWN	SYBR	None	579.137	410.125	817.799	21.0984	20.9673	-10.6942	0.179309	-9.17776	TRUE	0.423505	TRUE	3	14	1	82.8602
G7	T14	GAPDH	UNKNOWN	SYBR	None	3002.77	2208.06	4083.51	20.139	20.1645	-13.0685	0.159742	-11.5521	TRUE	0.423505	TRUE	3	14	1	82.6667
G8	T14	GAPDH	UNKNOWN	SYBR	None	3002.77	2208.06	4083.51	20.1378	20.1645	-13.0685	0.159742	-11.5521	TRUE	0.423505	TRUE	3	13	1	82.6667
G9	T14	GAPDH	UNKNOWN	SYBR	None	3002.77	2208.06	4083.51	20.2168	20.1645	-13.0685	0.159742	-11.5521	TRUE	0.423505	TRUE	3	14	1	82.4731
H1	N11	GAPDH	UNKNOWN	SYBR	None	1	0.789729	1.26626	28.1213	28.1716	-1.51647	0.122664	0	TRUE	0.423505	TRUE	3	22	1	82.2795
H2	N11	GAPDH	UNKNOWN	SYBR	None	1	0.789729	1.26626	28.3838	28.1716	-1.51647	0.122664	0	TRUE	0.423505	TRUE	3	21	1	82.2795
H3	N11	GAPDH	UNKNOWN	SYBR	None	1	0.789729	1.26626	28.0096	28.1716	-1.51647	0.122664	0	TRUE	0.423505	TRUE	3	22	1	82.2795
H4	N12	GAPDH	UNKNOWN	SYBR	None	29.075	21.6711	39.0085	25.2993	25.397	-6.37818	0.152716	-4.86171	TRUE	0.423505	TRUE	3	19	1	82.4731
H5	N12	GAPDH	UNKNOWN	SYBR	None	29.075	21.6711	39.0085	25.5311	25.397	-6.37818	0.152716	-4.86171	TRUE	0.423505	TRUE	3	18	1	82.4731
H6	N12	GAPDH	UNKNOWN	SYBR	None	29.075	21.6711	39.0085	25.3607	25.397	-6.37818	0.152716	-4.86171	TRUE	0.423505	TRUE	3	19	1	82.4731
H7	N14	GAPDH	UNKNOWN	SYBR	None	2.43261	1.95995	3.01926	27.629	27.6291	-2.79897	0.112263	-1.2825	TRUE	0.423505	TRUE	3	21	1	82.4731
H8	N14	GAPDH	UNKNOWN	SYBR	None	2.43261	1.95995	3.01926	27.7418	27.6291	-2.79897	0.112263	-1.2825	TRUE	0.423505	TRUE	3	21	1	82.2795
H9	N14	GAPDH	UNKNOWN	SYBR	None	2.43261	1.95995	3.01926	27.5165	27.6291	-2.79897	0.112263	-1.2825	TRUE	0.423505	TRUE	3	20	1	82.2795
A7	X1T	BZRAP1-AS1	UNKNOWN	SYBR	None	0.276868	0.173582	0.441612	29.5816	29.6306	-5.93814	0.242605	1.85273	TRUE	0.0821202	TRUE	3	26	1	90.0647
A8	X1T	BZRAP1-AS1	UNKNOWN	SYBR	None	0.276868	0.173582	0.441612	29.4297	29.6306	-5.93814	0.242605	1.85273	TRUE	0.0821202	TRUE	3	26	1	90.0647
A9	X1T	BZRAP1-AS1	UNKNOWN	SYBR	None	0.276868	0.173582	0.441612	29.8805	29.6306	-5.93814	0.242605	1.85273	TRUE	0.0821202	TRUE	3	26	1	89.8734
B7	X2N	BZRAP1-AS1	UNKNOWN	SYBR	None	0.246577	0.0339214	1.79238	29.6891	30.5108	-5.77098	0.899236	2.01989	TRUE	0.0821202	TRUE	3	27	1	90.2561
B8	X2N	BZRAP1-AS1	UNKNOWN	SYBR	None	0.246577	0.0339214	1.79238	31.3325	30.5108	-5.77098	0.899236	2.01989	TRUE	0.0821202	TRUE	3	28	1	90.0647
B9	X2N	BZRAP1-AS1	UNKNOWN	SYBR	None	0.246577	0.0339214	1.79238	Undetermined	30.5108	-5.77098	0.899236	2.01989	TRUE	0.0821202	TRUE	3	36	1	75.5237
C7	X3T	BZRAP1-AS1	UNKNOWN	SYBR	None	0.385188	0.163933	0.905062	27.9344	27.9638	-6.4145	0.443896	1.37637	TRUE	0.0821202	TRUE	3	25	1	90.4474
C8	X3T	BZRAP1-AS1	UNKNOWN	SYBR	None	0.385188	0.163933	0.905062	28.2663	27.9638	-6.4145	0.443896	1.37637	TRUE	0.0821202	TRUE	3	25	1	90.2561
C9	X3T	BZRAP1-AS1	UNKNOWN	SYBR	None	0.385188	0.163933	0.905062	27.6906	27.9638	-6.4145	0.443896	1.37637	TRUE	0.0821202	TRUE	3	24	1	90.2561
D7	X4N	BZRAP1-AS1	UNKNOWN	SYBR	None	1	0.457053	2.18793	27.891	27.5701	-7.79087	0.406839	0	TRUE	0.0821202	TRUE	3	25	1	90.4474
D8	X4N	BZRAP1-AS1	UNKNOWN	SYBR	None	1	0.457053	2.18793	27.3943	27.5701	-7.79087	0.406839	0	TRUE	0.0821202	TRUE	3	24	1	90.4474
D9	X4N	BZRAP1-AS1	UNKNOWN	SYBR	None	1	0.457053	2.18793	27.4252	27.5701	-7.79087	0.406839	0	TRUE	0.0821202	TRUE	3	25	1	90.2561
E7	X5T	BZRAP1-AS1	UNKNOWN	SYBR	None	0.0776	0.0388368	0.155053	31.218	30.5727	-4.10307	0.35968	3.6878	TRUE	0.0821202	TRUE	3	27	1	90.4474
E8	X5T	BZRAP1-AS1	UNKNOWN	SYBR	None	0.0776	0.0388368	0.155053	30.1565	30.5727	-4.10307	0.35968	3.6878	TRUE	0.0821202	TRUE	3	27	1	90.4474
E9	X5T	BZRAP1-AS1	UNKNOWN	SYBR	None	0.0776	0.0388368	0.155053	30.3434	30.5727	-4.10307	0.35968	3.6878	TRUE	0.0821202	TRUE	3	27	1	90.2561
F7	X6N	BZRAP1-AS1	UNKNOWN	SYBR	None	0.279665	0.0509284	1.53574	29.6617	29.2396	-5.95264	0.885001	1.83823	TRUE	0.0821202	TRUE	3	27	1	90.4474
F8	X6N	BZRAP1-AS1	UNKNOWN	SYBR	None	0.279665	0.0509284	1.53574	28.6174	29.2396	-5.95264	0.885001	1.83823	TRUE	0.0821202	TRUE	3	26	1	90.4474
F9	X6N	BZRAP1-AS1	UNKNOWN	SYBR	None	0.279665	0.0509284	1.53574	29.4397	29.2396	-5.95264	0.885001	1.83823	TRUE	0.0821202	TRUE	3	26	1	90.2561
G1	X1T	GAPDH	UNKNOWN	SYBR	None	4.22379	2.22023	8.03538	33.0983	33.0628	-2.5059	0.334179	-2.07854	TRUE	0.343975	TRUE	3	28	1	84.8988
G2	X1T	GAPDH	UNKNOWN	SYBR	None	4.22379	2.22023	8.03538	32.5867	33.0628	-2.5059	0.334179	-2.07854	TRUE	0.343975	TRUE	3	27	1	85.0902
G3	X1T	GAPDH	UNKNOWN	SYBR	None	4.22379	2.22023	8.03538	33.5035	33.0628	-2.5059	0.334179	-2.07854	TRUE	0.343975	TRUE	3	28	1	85.0902
G4	X3T	GAPDH	UNKNOWN	SYBR	None	0.948028	0.38527	2.3328	34.4443	34.0279	-0.350363	0.467886	0.0769984	TRUE	0.343975	TRUE	3	29	1	84.8988
G5	X3T	GAPDH	UNKNOWN	SYBR	None	0.948028	0.38527	2.3328	33.6815	34.0279	-0.350363	0.467886	0.0769984	TRUE	0.343975	TRUE	3	28	1	84.8988
G6	X3T	GAPDH	UNKNOWN	SYBR	None	0.948028	0.38527	2.3328	33.9579	34.0279	-0.350363	0.467886	0.0769984	TRUE	0.343975	TRUE	3	28	1	85.0902
G7	X5T	GAPDH	UNKNOWN	SYBR	None	2.26382	1.63062	3.14291	33.2298	33.0696	-1.60612	0.170484	-1.17876	TRUE	0.343975	TRUE	3	28	1	85.0902
G8	X5T	GAPDH	UNKNOWN	SYBR	None	2.26382	1.63062	3.14291	32.9586	33.0696	-1.60612	0.170484	-1.17876	TRUE	0.343975	TRUE	3	27	1	85.0902
G9	X5T	GAPDH	UNKNOWN	SYBR	None	2.26382	1.63062	3.14291	33.0205	33.0696	-1.60612	0.170484	-1.17876	TRUE	0.343975	TRUE	3	27	1	84.8988
H1	X2N	GAPDH	UNKNOWN	SYBR	None	3.03477	1.2825	7.18117	34.7328	34.2528	-2.02895	0.447562	-1.60159	TRUE	0.343975	TRUE	3	28	1	84.7075
H2	X2N	GAPDH	UNKNOWN	SYBR	None	3.03477	1.2825	7.18117	34.1793	34.2528	-2.02895	0.447562	-1.60159	TRUE	0.343975	TRUE	3	29	1	84.7075
H3	X2N	GAPDH	UNKNOWN	SYBR	None	3.03477	1.2825	7.18117	33.8463	34.2528	-2.02895	0.447562	-1.60159	TRUE	0.343975	TRUE	3	28	1	84.8988
H4	X4N	GAPDH	UNKNOWN	SYBR	None	1	0.321376	3.11162	34.0284	34.9337	-0.427362	0.589842	0	TRUE	0.343975	TRUE	3	29	1	84.7075
H5	X4N	GAPDH	UNKNOWN	SYBR	None	1	0.321376	3.11162	35.286	34.9337	-0.427362	0.589842	0	TRUE	0.343975	TRUE	3	30	1	84.7075
H6	X4N	GAPDH	UNKNOWN	SYBR	None	1	0.321376	3.11162	35.4865	34.9337	-0.427362	0.589842	0	TRUE	0.343975	TRUE	3	30	1	84.7075
H7	X6N	GAPDH	UNKNOWN	SYBR	None	0.727588	0.143094	3.69957	34.9424	35.2237	0.0314445	0.845024	0.458806	TRUE	0.343975	TRUE	3	29	1	84.8988
H8	X6N	GAPDH	UNKNOWN	SYBR	None	0.727588	0.143094	3.69957	35.5536	35.2237	0.0314445	0.845024	0.458806	TRUE	0.343975	TRUE	3	30	1	84.7075
H9	X6N	GAPDH	UNKNOWN	SYBR	None	0.727588	0.143094	3.69957	35.1751	35.2237	0.0314445	0.845024	0.458806	TRUE	0.343975	TRUE	3	30	1	84.7075
A7	7T	BZRAP1-AS1	UNKNOWN	SYBR	None	1	0.71062	1.40722	30.94	30.9006	-0.318649	0.177511	0	TRUE	0.103142	TRUE	3	27	1	89.9819
A8	7T	BZRAP1-AS1	UNKNOWN	SYBR	None	1	0.71062	1.40722	31.1792	30.9006	-0.318649	0.177511	0	TRUE	0.103142	TRUE	3	27	1	89.9819
A9	7T	BZRAP1-AS1	UNKNOWN	SYBR	None	1	0.71062	1.40722	30.5827	30.9006	-0.318649	0.177511	0	TRUE	0.103142	TRUE	3	27	1	89.786
B7	8N	BZRAP1-AS1	UNKNOWN	SYBR	None	4.57817	0.275839	75.9849	32.0991	31.8438	-2.51342	1.45973	-2.19477	TRUE	0.103142	TRUE	3	29	1	90.1778
B8	8N	BZRAP1-AS1	UNKNOWN	SYBR	None	4.57817	0.275839	75.9849	32.5332	31.8438	-2.51342	1.45973	-2.19477	TRUE	0.103142	TRUE	3	29	1	89.9819
B9	8N	BZRAP1-AS1	UNKNOWN	SYBR	None	4.57817	0.275839	75.9849	30.8991	31.8438	-2.51342	1.45973	-2.19477	TRUE	0.103142	TRUE	3	27	1	78.2275
C7	9T	BZRAP1-AS1	UNKNOWN	SYBR	None	0.114404	0.0428789	0.305237	32.7566	33.4845	2.80914	0.50993	3.12779	TRUE	0.103142	TRUE	3	30	1	78.2275
C8	9T	BZRAP1-AS1	UNKNOWN	SYBR	None	0.114404	0.0428789	0.305237	33.9037	33.4845	2.80914	0.50993	3.12779	TRUE	0.103142	TRUE	3	31	1	77.4439
C9	9T	BZRAP1-AS1	UNKNOWN	SYBR	None	0.114404	0.0428789	0.305237	33.7934	33.4845	2.80914	0.50993	3.12779	TRUE	0.103142	TRUE	3	30	1	78.2275
D7	10N	BZRAP1-AS1	UNKNOWN	SYBR	None	2.75652	0.0687981	110.445	36.6499	34.387	-1.7815	1.91768	-1.46285	TRUE	0.103142	TRUE	3	33	1	77.8357
D8	10N	BZRAP1-AS1	UNKNOWN	SYBR	None	2.75652	0.0687981	110.445	33.7209	34.387	-1.7815	1.91768	-1.46285	TRUE	0.103142	TRUE	3	30	1	90.3737
D9	10N	BZRAP1-AS1	UNKNOWN	SYBR	None	2.75652	0.0687981	110.445	32.7902	34.387	-1.7815	1.91768	-1.46285	TRUE	0.103142	TRUE	3	29	1	77.8357
E7	11T	BZRAP1-AS1	UNKNOWN	SYBR	None	0.501179	0.015446	16.2619	36.9735	33.504	0.677952	1.80808	0.996602	TRUE	0.103142	TRUE	3	34	1	77.8357
E8	11T	BZRAP1-AS1	UNKNOWN	SYBR	None	0.501179	0.015446	16.2619	32.6406	33.504	0.677952	1.80808	0.996602	TRUE	0.103142	TRUE	3	29	1	80.3825
E9	11T	BZRAP1-AS1	UNKNOWN	SYBR	None	0.501179	0.015446	16.2619	30.8981	33.504	0.677952	1.80808	0.996602	TRUE	0.103142	TRUE	3	27	1	90.1778
F7	12N	BZRAP1-AS1	UNKNOWN	SYBR	None	8.62224	5.7352	12.9626	31.0033	31.1059	-3.42671	0.21186	-3.10806	TRUE	0.103142	TRUE	3	27	1	90.3737
F8	12N	BZRAP1-AS1	UNKNOWN	SYBR	None	8.62224	5.7352	12.9626	31.2291	31.1059	-3.42671	0.21186	-3.10806	TRUE	0.103142	TRUE	3	28	1	90.3737
F9	12N	BZRAP1-AS1	UNKNOWN	SYBR	None	8.62224	5.7352	12.9626	31.0852	31.1059	-3.42671	0.21186	-3.10806	TRUE	0.103142	TRUE	3	28	1	90.1778
G1	7T	GAPDH	UNKNOWN	SYBR	None	1	0.90419	1.10596	32.0946	32.0953	0.875963	0.0523338	0	TRUE	0.377459	TRUE	3	27	1	84.8883
G2	7T	GAPDH	UNKNOWN	SYBR	None	1	0.90419	1.10596	32.0339	32.0953	0.875963	0.0523338	0	TRUE	0.377459	TRUE	3	27	1	85.0842
G3	7T	GAPDH	UNKNOWN	SYBR	None	1	0.90419	1.10596	32.1572	32.0953	0.875963	0.0523338	0	TRUE	0.377459	TRUE	3	26	1	85.0842
G4	9T	GAPDH	UNKNOWN	SYBR	None	0.22695	0.108084	0.476542	33.5453	33.6909	3.01552	0.385467	2.13955	TRUE	0.377459	TRUE	3	28	1	85.0842
G5	9T	GAPDH	UNKNOWN	SYBR	None	0.22695	0.108084	0.476542	33.9878	33.6909	3.01552	0.385467	2.13955	TRUE	0.377459	TRUE	3	29	1	84.8883
G6	9T	GAPDH	UNKNOWN	SYBR	None	0.22695	0.108084	0.476542	33.5397	33.6909	3.01552	0.385467	2.13955	TRUE	0.377459	TRUE	3	27	1	85.0842
G7	11T	GAPDH	UNKNOWN	SYBR	None	0.833421	0.460242	1.50919	34.4857	33.9649	1.13885	0.308543	0.262883	TRUE	0.377459	TRUE	3	29	1	84.8883
G8	11T	GAPDH	UNKNOWN	SYBR	None	0.833421	0.460242	1.50919	33.4563	33.9649	1.13885	0.308543	0.262883	TRUE	0.377459	TRUE	3	27	1	84.8883
G9	11T	GAPDH	UNKNOWN	SYBR	None	0.833421	0.460242	1.50919	33.9528	33.9649	1.13885	0.308543	0.262883	TRUE	0.377459	TRUE	3	28	1	84.6924
H1	8N	GAPDH	UNKNOWN	SYBR	None	1.8319	0.126761	26.4738	34.0871	34.3599	0.00262451	1.3878	-0.873339	TRUE	0.377459	TRUE	3	28	1	84.8883
H2	8N	GAPDH	UNKNOWN	SYBR	None	1.8319	0.126761	26.4738	34.7111	34.3599	0.00262451	1.3878	-0.873339	TRUE	0.377459	TRUE	3	29	1	84.6924
H3	8N	GAPDH	UNKNOWN	SYBR	None	1.8319	0.126761	26.4738	34.2814	34.3599	0.00262451	1.3878	-0.873339	TRUE	0.377459	TRUE	3	28	1	84.8883
H4	10N	GAPDH	UNKNOWN	SYBR	None	4.08583	0.194517	85.8228	34.1734	35.0138	-1.15467	1.58212	-2.03063	TRUE	0.377459	TRUE	3	28	1	84.6924
H5	10N	GAPDH	UNKNOWN	SYBR	None	4.08583	0.194517	85.8228	35.3696	35.0138	-1.15467	1.58212	-2.03063	TRUE	0.377459	TRUE	3	29	1	84.6924
H6	10N	GAPDH	UNKNOWN	SYBR	None	4.08583	0.194517	85.8228	35.4984	35.0138	-1.15467	1.58212	-2.03063	TRUE	0.377459	TRUE	3	30	1	84.6924
H7	12N	GAPDH	UNKNOWN	SYBR	None	2.18825	1.34756	3.55341	33.9807	34.2788	-0.253816	0.251914	-1.12978	TRUE	0.377459	TRUE	3	28	1	84.8883
H8	12N	GAPDH	UNKNOWN	SYBR	None	2.18825	1.34756	3.55341	34.4741	34.2788	-0.253816	0.251914	-1.12978	TRUE	0.377459	TRUE	3	29	1	84.6924
H9	12N	GAPDH	UNKNOWN	SYBR	None	2.18825	1.34756	3.55341	34.3816	34.2788	-0.253816	0.251914	-1.12978	TRUE	0.377459	TRUE	3	29	1	84.4965
A4	T3	BZRAP1-AS1	UNKNOWN	SYBR	None				Undetermined					TRUE	0.300866	TRUE	3	39	1	61.9941
A5	T3	BZRAP1-AS1	UNKNOWN	SYBR	None				Undetermined					TRUE	0.300866	TRUE	3	39	1	61.7947
A6	T3	BZRAP1-AS1	UNKNOWN	SYBR	None				Undetermined					TRUE	0.300866	TRUE	3	35	1	61.7947
B4	N3	BZRAP1-AS1	UNKNOWN	SYBR	None				Undetermined					TRUE	0.300866	TRUE	3	39	1	61.9941
B5	N3	BZRAP1-AS1	UNKNOWN	SYBR	None				Undetermined					TRUE	0.300866	TRUE	3	39	1	61.7947
B6	N3	BZRAP1-AS1	UNKNOWN	SYBR	None				Undetermined					TRUE	0.300866	TRUE	3	39	1	61.7947
C4	T9	BZRAP1-AS1	UNKNOWN	SYBR	None	0.133529	0.0107252	1.66245	35.9411	35.5259	-0.0766735	1.14317	2.90477	TRUE	0.300866	TRUE	3	30	1	90.1106
C5	T9	BZRAP1-AS1	UNKNOWN	SYBR	None	0.133529	0.0107252	1.66245	35.1108	35.5259	-0.0766735	1.14317	2.90477	TRUE	0.300866	TRUE	3	29	1	90.3101
C6	T9	BZRAP1-AS1	UNKNOWN	SYBR	None	0.133529	0.0107252	1.66245	Undetermined	35.5259	-0.0766735	1.14317	2.90477	TRUE	0.300866	TRUE	3	39	1	61.9941
D4	N9	BZRAP1-AS1	UNKNOWN	SYBR	None				Undetermined					TRUE	0.300866	TRUE	3	39	1	61.7947
D5	N9	BZRAP1-AS1	UNKNOWN	SYBR	None				Undetermined					TRUE	0.300866	TRUE	3	39	1	61.7947
D6	N9	BZRAP1-AS1	UNKNOWN	SYBR	None				Undetermined					TRUE	0.300866	TRUE	3	39	1	61.9941
E4	T13	BZRAP1-AS1	UNKNOWN	SYBR	None	1	0.61753	1.61936	32.1687	32.436	-2.98145	0.250471	0	TRUE	0.300866	TRUE	3	26	1	90.3101
E5	T13	BZRAP1-AS1	UNKNOWN	SYBR	None	1	0.61753	1.61936	32.4212	32.436	-2.98145	0.250471	0	TRUE	0.300866	TRUE	3	27	1	90.3101
E6	T13	BZRAP1-AS1	UNKNOWN	SYBR	None	1	0.61753	1.61936	32.718	32.436	-2.98145	0.250471	0	TRUE	0.300866	TRUE	3	27	1	90.3101
F4	N13	BZRAP1-AS1	UNKNOWN	SYBR	None	1.65591	1.12168	2.44458	32.6725	33.0588	-3.70907	0.202403	-0.727627	TRUE	0.300866	TRUE	3	27	1	90.3101
F5	N13	BZRAP1-AS1	UNKNOWN	SYBR	None	1.65591	1.12168	2.44458	33.1988	33.0588	-3.70907	0.202403	-0.727627	TRUE	0.300866	TRUE	3	27	1	90.3101
F6	N13	BZRAP1-AS1	UNKNOWN	SYBR	None	1.65591	1.12168	2.44458	33.305	33.0588	-3.70907	0.202403	-0.727627	TRUE	0.300866	TRUE	3	27	1	90.3101
G4	T30	BZRAP1-AS1	UNKNOWN	SYBR	None	0.045423	0.0284882	0.0724247	33.978	33.7003	1.47898	0.242417	4.46043	TRUE	0.300866	TRUE	3	28	1	90.1106
G5	T30	BZRAP1-AS1	UNKNOWN	SYBR	None	0.045423	0.0284882	0.0724247	33.4774	33.7003	1.47898	0.242417	4.46043	TRUE	0.300866	TRUE	3	28	1	77.5479
G6	T30	BZRAP1-AS1	UNKNOWN	SYBR	None	0.045423	0.0284882	0.0724247	33.6453	33.7003	1.47898	0.242417	4.46043	TRUE	0.300866	TRUE	3	28	1	90.1106
H4	N30	BZRAP1-AS1	UNKNOWN	SYBR	None	0.210414	0.0439593	1.00716	34.1292	35.1312	-0.732751	0.813627	2.2487	TRUE	0.300866	TRUE	3	28	1	89.9112
H5	N30	BZRAP1-AS1	UNKNOWN	SYBR	None	0.210414	0.0439593	1.00716	35.3513	35.1312	-0.732751	0.813627	2.2487	TRUE	0.300866	TRUE	3	29	1	90.1106
H6	N30	BZRAP1-AS1	UNKNOWN	SYBR	None	0.210414	0.0439593	1.00716	35.9131	35.1312	-0.732751	0.813627	2.2487	TRUE	0.300866	TRUE	3	30	1	90.1106
A10	T3	GAPDH	UNKNOWN	SYBR	None				Undetermined					TRUE	0.181385	TRUE	3	39	1	61.5953
A11	T3	GAPDH	UNKNOWN	SYBR	None				Undetermined					TRUE	0.181385	TRUE	3	39	1	61.7947
A12	T3	GAPDH	UNKNOWN	SYBR	None				Undetermined					TRUE	0.181385	TRUE	3	39	1	61.9941
B10	N3	GAPDH	UNKNOWN	SYBR	None				Undetermined					TRUE	0.181385	TRUE	3	39	1	61.9941
B11	N3	GAPDH	UNKNOWN	SYBR	None				Undetermined					TRUE	0.181385	TRUE	3	39	1	61.7947
B12	N3	GAPDH	UNKNOWN	SYBR	None				Undetermined					TRUE	0.181385	TRUE	3	39	1	61.7947
C10	T9	GAPDH	UNKNOWN	SYBR	None	0.078441	0.00745535	0.825311	36.9999	36.9387	1.33612	1.06687	3.67225	TRUE	0.181385	TRUE	3	31	1	84.5272
C11	T9	GAPDH	UNKNOWN	SYBR	None	0.078441	0.00745535	0.825311	36.8776	36.9387	1.33612	1.06687	3.67225	TRUE	0.181385	TRUE	3	32	1	84.3278
C12	T9	GAPDH	UNKNOWN	SYBR	None	0.078441	0.00745535	0.825311	Undetermined	36.9387	1.33612	1.06687	3.67225	TRUE	0.181385	TRUE	3	35	1	61.7947
D10	N9	GAPDH	UNKNOWN	SYBR	None				Undetermined					TRUE	0.181385	TRUE	3	39	1	61.7947
D11	N9	GAPDH	UNKNOWN	SYBR	None				Undetermined					TRUE	0.181385	TRUE	3	39	1	61.5953
D12	N9	GAPDH	UNKNOWN	SYBR	None				Undetermined					TRUE	0.181385	TRUE	3	39	1	61.7947
E10	T13	GAPDH	UNKNOWN	SYBR	None	1	0.615497	1.6247	33.3103	33.0813	-2.33613	0.252184	0	TRUE	0.181385	TRUE	3	28	1	84.7266
E11	T13	GAPDH	UNKNOWN	SYBR	None	1	0.615497	1.6247	32.7697	33.0813	-2.33613	0.252184	0	TRUE	0.181385	TRUE	3	28	1	84.7266
E12	T13	GAPDH	UNKNOWN	SYBR	None	1	0.615497	1.6247	33.1638	33.0813	-2.33613	0.252184	0	TRUE	0.181385	TRUE	3	28	1	84.5272
F10	N13	GAPDH	UNKNOWN	SYBR	None	0.298571	0.0764631	1.16585	34.764	36.1756	-0.592272	0.707825	1.74386	TRUE	0.181385	TRUE	3	30	1	84.7266
F11	N13	GAPDH	UNKNOWN	SYBR	None	0.298571	0.0764631	1.16585	36.9034	36.1756	-0.592272	0.707825	1.74386	TRUE	0.181385	TRUE	3	32	1	84.3278
F12	N13	GAPDH	UNKNOWN	SYBR	None	0.298571	0.0764631	1.16585	36.8593	36.1756	-0.592272	0.707825	1.74386	TRUE	0.181385	TRUE	3	32	1	84.1284
G10	T30	GAPDH	UNKNOWN	SYBR	None	0.654035	0.450234	0.950088	30.5433	30.4977	-1.72357	0.194022	0.61256	TRUE	0.181385	TRUE	3	25	1	84.7266
G11	T30	GAPDH	UNKNOWN	SYBR	None	0.654035	0.450234	0.950088	30.4747	30.4977	-1.72357	0.194022	0.61256	TRUE	0.181385	TRUE	3	25	1	84.5272
G12	T30	GAPDH	UNKNOWN	SYBR	None	0.654035	0.450234	0.950088	30.4751	30.4977	-1.72357	0.194022	0.61256	TRUE	0.181385	TRUE	3	25	1	84.5272
H10	N30	GAPDH	UNKNOWN	SYBR	None	6.22936	1.87527	20.693	30.9777	30.8887	-4.97521	0.623814	-2.63908	TRUE	0.181385	TRUE	3	26	1	84.5272
H11	N30	GAPDH	UNKNOWN	SYBR	None	6.22936	1.87527	20.693	30.7579	30.8887	-4.97521	0.623814	-2.63908	TRUE	0.181385	TRUE	3	26	1	84.5272
H12	N30	GAPDH	UNKNOWN	SYBR	None	6.22936	1.87527	20.693	30.9306	30.8887	-4.97521	0.623814	-2.63908	TRUE	0.181385	TRUE	3	26	1	84.3278
A4	T44	BZRAP1-AS1	UNKNOWN	SYBR	None	0.125823	0.0672941	0.235258	32.6943	33.2407	2.80648	0.325181	2.99053	TRUE	0.216049	TRUE	3	27	1	89.8942
A5	T44	BZRAP1-AS1	UNKNOWN	SYBR	None	0.125823	0.0672941	0.235258	33.2465	33.2407	2.80648	0.325181	2.99053	TRUE	0.216049	TRUE	3	28	1	89.8942
A6	T44	BZRAP1-AS1	UNKNOWN	SYBR	None	0.125823	0.0672941	0.235258	33.7812	33.2407	2.80648	0.325181	2.99053	TRUE	0.216049	TRUE	3	29	1	90.085
B4	N44	BZRAP1-AS1	UNKNOWN	SYBR	None	6.7432	2.81364	16.1608	31.8129	32.333	-2.93748	0.454176	-2.75343	TRUE	0.216049	TRUE	3	26	1	90.085
B5	N44	BZRAP1-AS1	UNKNOWN	SYBR	None	6.7432	2.81364	16.1608	32.7282	32.333	-2.93748	0.454176	-2.75343	TRUE	0.216049	TRUE	3	27	1	90.085
B6	N44	BZRAP1-AS1	UNKNOWN	SYBR	None	6.7432	2.81364	16.1608	32.4577	32.333	-2.93748	0.454176	-2.75343	TRUE	0.216049	TRUE	3	27	1	90.085
C4	T43	BZRAP1-AS1	UNKNOWN	SYBR	None	7.95592	0.317371	199.44	Undetermined	30.6579	-3.17608	1.46044	-2.99203	TRUE	0.216049	TRUE	3	39	1	64.715
C5	T43	BZRAP1-AS1	UNKNOWN	SYBR	None	7.95592	0.317371	199.44	31.9202	30.6579	-3.17608	1.46044	-2.99203	TRUE	0.216049	TRUE	3	27	1	78.8306
C6	T43	BZRAP1-AS1	UNKNOWN	SYBR	None	7.95592	0.317371	199.44	29.3956	30.6579	-3.17608	1.46044	-2.99203	TRUE	0.216049	TRUE	3	24	1	78.0676
D4	N43	BZRAP1-AS1	UNKNOWN	SYBR	None	1.01882	0.192079	5.404	33.7084	34.8613	-0.21095	0.866982	-0.0268993	TRUE	0.216049	TRUE	3	29	1	90.2757
D5	N43	BZRAP1-AS1	UNKNOWN	SYBR	None	1.01882	0.192079	5.404	35.9037	34.8613	-0.21095	0.866982	-0.0268993	TRUE	0.216049	TRUE	3	31	1	90.4665
D6	N43	BZRAP1-AS1	UNKNOWN	SYBR	None	1.01882	0.192079	5.404	34.9717	34.8613	-0.21095	0.866982	-0.0268993	TRUE	0.216049	TRUE	3	29	1	78.4491
E4	T55	BZRAP1-AS1	UNKNOWN	SYBR	None	12.9893	0.559572	301.519	29.8887	29.9051	-3.8833	1.63405	-3.69925	TRUE	0.216049	TRUE	3	25	1	90.4665
E5	T55	BZRAP1-AS1	UNKNOWN	SYBR	None	12.9893	0.559572	301.519	30.2	29.9051	-3.8833	1.63405	-3.69925	TRUE	0.216049	TRUE	3	24	1	90.4665
E6	T55	BZRAP1-AS1	UNKNOWN	SYBR	None	12.9893	0.559572	301.519	29.6264	29.9051	-3.8833	1.63405	-3.69925	TRUE	0.216049	TRUE	3	25	1	90.4665
F4	N55	BZRAP1-AS1	UNKNOWN	SYBR	None	1	0.48956	2.04265	31.9449	31.9428	-0.184051	0.371137	0	TRUE	0.216049	TRUE	3	27	1	90.2757
F5	N55	BZRAP1-AS1	UNKNOWN	SYBR	None	1	0.48956	2.04265	31.688	31.9428	-0.184051	0.371137	0	TRUE	0.216049	TRUE	3	26	1	90.2757
F6	N55	BZRAP1-AS1	UNKNOWN	SYBR	None	1	0.48956	2.04265	32.1957	31.9428	-0.184051	0.371137	0	TRUE	0.216049	TRUE	3	27	1	90.2757
G4	T56	BZRAP1-AS1	UNKNOWN	SYBR	None	12.8984	5.92247	28.091	30.4902	30.9753	-3.87317	0.404445	-3.68912	TRUE	0.216049	TRUE	3	25	1	90.2757
G5	T56	BZRAP1-AS1	UNKNOWN	SYBR	None	12.8984	5.92247	28.091	30.8905	30.9753	-3.87317	0.404445	-3.68912	TRUE	0.216049	TRUE	3	26	1	90.2757
G6	T56	BZRAP1-AS1	UNKNOWN	SYBR	None	12.8984	5.92247	28.091	31.5453	30.9753	-3.87317	0.404445	-3.68912	TRUE	0.216049	TRUE	3	26	1	90.4665
H4	N56	BZRAP1-AS1	UNKNOWN	SYBR	None	1.22863	0.384129	3.92974	32.7324	32.7133	-0.481098	0.604149	-0.297047	TRUE	0.216049	TRUE	3	27	1	78.2584
H5	N56	BZRAP1-AS1	UNKNOWN	SYBR	None	1.22863	0.384129	3.92974	32.0693	32.7133	-0.481098	0.604149	-0.297047	TRUE	0.216049	TRUE	3	27	1	79.5936
H6	N56	BZRAP1-AS1	UNKNOWN	SYBR	None	1.22863	0.384129	3.92974	33.3381	32.7133	-0.481098	0.604149	-0.297047	TRUE	0.216049	TRUE	3	28	1	79.2121
A10	T44	GAPDH	UNKNOWN	SYBR	None	0.614565	0.510496	0.73985	31.5584	31.4696	1.03545	0.0964063	0.702362	TRUE	0.373833	TRUE	3	25	1	84.5532
A11	T44	GAPDH	UNKNOWN	SYBR	None	0.614565	0.510496	0.73985	31.4147	31.4696	1.03545	0.0964063	0.702362	TRUE	0.373833	TRUE	3	25	1	84.5532
A12	T44	GAPDH	UNKNOWN	SYBR	None	0.614565	0.510496	0.73985	31.4359	31.4696	1.03545	0.0964063	0.702362	TRUE	0.373833	TRUE	3	25	1	84.5532
B10	N44	GAPDH	UNKNOWN	SYBR	None	1.83356	0.867953	3.87343	34.8367	34.7289	-0.541562	0.388612	-0.87465	TRUE	0.373833	TRUE	3	29	1	84.7439
B11	N44	GAPDH	UNKNOWN	SYBR	None	1.83356	0.867953	3.87343	34.459	34.7289	-0.541562	0.388612	-0.87465	TRUE	0.373833	TRUE	3	28	1	84.5532
B12	N44	GAPDH	UNKNOWN	SYBR	None	1.83356	0.867953	3.87343	34.8909	34.7289	-0.541562	0.388612	-0.87465	TRUE	0.373833	TRUE	3	28	1	84.3624
C10	T43	GAPDH	UNKNOWN	SYBR	None	0.789443	0.177475	3.5116	34.14	34.5082	0.67418	0.775532	0.341092	TRUE	0.373833	TRUE	3	28	1	84.5532
C11	T43	GAPDH	UNKNOWN	SYBR	None	0.789443	0.177475	3.5116	34.4018	34.5082	0.67418	0.775532	0.341092	TRUE	0.373833	TRUE	3	28	1	84.5532
C12	T43	GAPDH	UNKNOWN	SYBR	None	0.789443	0.177475	3.5116	34.9827	34.5082	0.67418	0.775532	0.341092	TRUE	0.373833	TRUE	3	29	1	84.3624
D10	N43	GAPDH	UNKNOWN	SYBR	None	1.22506	0.332727	4.51054	35.2009	35.1125	0.0402311	0.677285	-0.292857	TRUE	0.373833	TRUE	3	29	1	84.7439
D11	N43	GAPDH	UNKNOWN	SYBR	None	1.22506	0.332727	4.51054	35.6421	35.1125	0.0402311	0.677285	-0.292857	TRUE	0.373833	TRUE	3	29	1	84.5532
D12	N43	GAPDH	UNKNOWN	SYBR	None	1.22506	0.332727	4.51054	34.4944	35.1125	0.0402311	0.677285	-0.292857	TRUE	0.373833	TRUE	3	28	1	84.3624
E10	T55	GAPDH	UNKNOWN	SYBR	None	0.280143	0.00711551	11.0295	33.9573	35.9572	2.16885	1.90858	1.83576	TRUE	0.373833	TRUE	3	27	1	79.0214
E11	T55	GAPDH	UNKNOWN	SYBR	None	0.280143	0.00711551	11.0295	36.9713	35.9572	2.16885	1.90858	1.83576	TRUE	0.373833	TRUE	3	31	1	84.3624
E12	T55	GAPDH	UNKNOWN	SYBR	None	0.280143	0.00711551	11.0295	36.9431	35.9572	2.16885	1.90858	1.83576	TRUE	0.373833	TRUE	3	31	1	84.3624
F10	N55	GAPDH	UNKNOWN	SYBR	None	1	0.512571	1.95095	32.3311	32.46	0.333088	0.347271	0	TRUE	0.373833	TRUE	3	26	1	84.7439
F11	N55	GAPDH	UNKNOWN	SYBR	None	1	0.512571	1.95095	32.5476	32.46	0.333088	0.347271	0	TRUE	0.373833	TRUE	3	27	1	84.5532
F12	N55	GAPDH	UNKNOWN	SYBR	None	1	0.512571	1.95095	32.5013	32.46	0.333088	0.347271	0	TRUE	0.373833	TRUE	3	27	1	84.3624
G10	T56	GAPDH	UNKNOWN	SYBR	None	1.39784	0.742661	2.63103	34.3336	34.6984	-0.150114	0.328631	-0.483202	TRUE	0.373833	TRUE	3	29	1	84.5532
G11	T56	GAPDH	UNKNOWN	SYBR	None	1.39784	0.742661	2.63103	35.0118	34.6984	-0.150114	0.328631	-0.483202	TRUE	0.373833	TRUE	3	28	1	84.3624
G12	T56	GAPDH	UNKNOWN	SYBR	None	1.39784	0.742661	2.63103	34.7497	34.6984	-0.150114	0.328631	-0.483202	TRUE	0.373833	TRUE	3	29	1	84.1717
H10	N56	GAPDH	UNKNOWN	SYBR	None	0.714025	0.249309	2.04498	34.3129	34.0134	0.819041	0.546757	0.485953	TRUE	0.373833	TRUE	3	28	1	84.3624
H11	N56	GAPDH	UNKNOWN	SYBR	None	0.714025	0.249309	2.04498	33.4931	34.0134	0.819041	0.546757	0.485953	TRUE	0.373833	TRUE	3	27	1	84.3624
H12	N56	GAPDH	UNKNOWN	SYBR	None	0.714025	0.249309	2.04498	34.2342	34.0134	0.819041	0.546757	0.485953	TRUE	0.373833	TRUE	3	28	1	84.1717
A7	X13T	BZRAP1-AS1	UNKNOWN	SYBR	None	1			Undetermined	35.3932	2.52568		0	TRUE	0.229049	TRUE	3	39	1	61.7673
A8	X13T	BZRAP1-AS1	UNKNOWN	SYBR	None	1			Undetermined	35.3932	2.52568		0	TRUE	0.229049	TRUE	3	38	1	62.1509
A9	X13T	BZRAP1-AS1	UNKNOWN	SYBR	None	1			35.3932	35.3932	2.52568		0	TRUE	0.229049	TRUE	3	30	1	89.7719
B7	X14N	BZRAP1-AS1	UNKNOWN	SYBR	None	2.73711	1.38256	5.41875	36.4049	35.7181	1.07303	0.354882	-1.45265	TRUE	0.229049	TRUE	3	31	1	89.9637
B8	X14N	BZRAP1-AS1	UNKNOWN	SYBR	None	2.73711	1.38256	5.41875	35.3637	35.7181	1.07303	0.354882	-1.45265	TRUE	0.229049	TRUE	3	30	1	89.9637
B9	X14N	BZRAP1-AS1	UNKNOWN	SYBR	None	2.73711	1.38256	5.41875	35.3856	35.7181	1.07303	0.354882	-1.45265	TRUE	0.229049	TRUE	3	30	1	89.9637
C7	X15T	BZRAP1-AS1	UNKNOWN	SYBR	None	0.246656	0.0320904	1.89587	35.837	34.9357	4.54511	0.924536	2.01943	TRUE	0.229049	TRUE	3	30	1	90.1556
C8	X15T	BZRAP1-AS1	UNKNOWN	SYBR	None	0.246656	0.0320904	1.89587	Undetermined	34.9357	4.54511	0.924536	2.01943	TRUE	0.229049	TRUE	3	35	1	76.1532
C9	X15T	BZRAP1-AS1	UNKNOWN	SYBR	None	0.246656	0.0320904	1.89587	34.0344	34.9357	4.54511	0.924536	2.01943	TRUE	0.229049	TRUE	3	28	1	89.9637
D7	X16N	BZRAP1-AS1	UNKNOWN	SYBR	None	0.827714			36.4428	36.4428	2.79847		0.272795	TRUE	0.229049	TRUE	3	31	1	90.3474
D8	X16N	BZRAP1-AS1	UNKNOWN	SYBR	None	0.827714			Undetermined	36.4428	2.79847		0.272795	TRUE	0.229049	TRUE	3	39	1	62.3427
D9	X16N	BZRAP1-AS1	UNKNOWN	SYBR	None	0.827714			Undetermined	36.4428	2.79847		0.272795	TRUE	0.229049	TRUE	3	35	1	62.3427
E7	X17T	BZRAP1-AS1	UNKNOWN	SYBR	None	0.876467	0.298822	2.57075	36.3506	35.6423	2.71591	0.559138	0.190228	TRUE	0.229049	TRUE	3	30	1	90.3474
E8	X17T	BZRAP1-AS1	UNKNOWN	SYBR	None	0.876467	0.298822	2.57075	34.6192	35.6423	2.71591	0.559138	0.190228	TRUE	0.229049	TRUE	3	29	1	90.3474
E9	X17T	BZRAP1-AS1	UNKNOWN	SYBR	None	0.876467	0.298822	2.57075	35.9571	35.6423	2.71591	0.559138	0.190228	TRUE	0.229049	TRUE	3	31	1	90.1556
F7	X18N	BZRAP1-AS1	UNKNOWN	SYBR	None	4.76409	1.18474	19.1575	33.9264	34.2407	0.273478	0.723095	-2.2522	TRUE	0.229049	TRUE	3	28	1	90.3474
F8	X18N	BZRAP1-AS1	UNKNOWN	SYBR	None	4.76409	1.18474	19.1575	35.3356	34.2407	0.273478	0.723095	-2.2522	TRUE	0.229049	TRUE	3	30	1	90.1556
F9	X18N	BZRAP1-AS1	UNKNOWN	SYBR	None	4.76409	1.18474	19.1575	33.46	34.2407	0.273478	0.723095	-2.2522	TRUE	0.229049	TRUE	3	28	1	90.1556
G1	X13T	GAPDH	UNKNOWN	SYBR	None	1	0.751486	1.3307	31.7585	31.6758	-1.19169	0.148457	0	TRUE	0.425134	TRUE	3	25	1	84.7848
G2	X13T	GAPDH	UNKNOWN	SYBR	None	1	0.751486	1.3307	31.8179	31.6758	-1.19169	0.148457	0	TRUE	0.425134	TRUE	3	26	1	84.9766
G3	X13T	GAPDH	UNKNOWN	SYBR	None	1	0.751486	1.3307	31.4512	31.6758	-1.19169	0.148457	0	TRUE	0.425134	TRUE	3	25	1	84.9766
G4	X15T	GAPDH	UNKNOWN	SYBR	None	1.25244	0.838887	1.86987	28.9292	28.8742	-1.51644	0.20825	-0.324745	TRUE	0.425134	TRUE	3	23	1	85.1684
G5	X15T	GAPDH	UNKNOWN	SYBR	None	1.25244	0.838887	1.86987	28.871	28.8742	-1.51644	0.20825	-0.324745	TRUE	0.425134	TRUE	3	22	1	85.1684
G6	X15T	GAPDH	UNKNOWN	SYBR	None	1.25244	0.838887	1.86987	28.8223	28.8742	-1.51644	0.20825	-0.324745	TRUE	0.425134	TRUE	3	22	1	85.1684
G7	X17T	GAPDH	UNKNOWN	SYBR	None	1.17286	0.771879	1.78214	31.6576	31.5047	-1.42172	0.217393	-0.230028	TRUE	0.425134	TRUE	3	25	1	84.9766
G8	X17T	GAPDH	UNKNOWN	SYBR	None	1.17286	0.771879	1.78214	31.3279	31.5047	-1.42172	0.217393	-0.230028	TRUE	0.425134	TRUE	3	25	1	84.9766
G9	X17T	GAPDH	UNKNOWN	SYBR	None	1.17286	0.771879	1.78214	31.5285	31.5047	-1.42172	0.217393	-0.230028	TRUE	0.425134	TRUE	3	25	1	84.7848
H1	X14N	GAPDH	UNKNOWN	SYBR	None	1.54639	1.21218	1.97273	32.6513	32.8245	-1.82059	0.126526	-0.6289	TRUE	0.425134	TRUE	3	26	1	84.593
H2	X14N	GAPDH	UNKNOWN	SYBR	None	1.54639	1.21218	1.97273	32.9516	32.8245	-1.82059	0.126526	-0.6289	TRUE	0.425134	TRUE	3	27	1	84.7848
H3	X14N	GAPDH	UNKNOWN	SYBR	None	1.54639	1.21218	1.97273	32.8704	32.8245	-1.82059	0.126526	-0.6289	TRUE	0.425134	TRUE	3	27	1	84.7848
H4	X16N	GAPDH	UNKNOWN	SYBR	None	1.11969	0.834223	1.50283	32.3097	32.2896	-1.35478	0.152925	-0.163095	TRUE	0.425134	TRUE	3	26	1	84.7848
H5	X16N	GAPDH	UNKNOWN	SYBR	None	1.11969	0.834223	1.50283	32.201	32.2896	-1.35478	0.152925	-0.163095	TRUE	0.425134	TRUE	3	26	1	84.7848
H6	X16N	GAPDH	UNKNOWN	SYBR	None	1.11969	0.834223	1.50283	32.358	32.2896	-1.35478	0.152925	-0.163095	TRUE	0.425134	TRUE	3	26	1	84.9766
H7	X18N	GAPDH	UNKNOWN	SYBR	None	0.839728	0.349927	2.01512	32.9426	33.0275	-0.939685	0.454851	0.252005	TRUE	0.425134	TRUE	3	26	1	84.7848
H8	X18N	GAPDH	UNKNOWN	SYBR	None	0.839728	0.349927	2.01512	33.0545	33.0275	-0.939685	0.454851	0.252005	TRUE	0.425134	TRUE	3	27	1	84.7848
H9	X18N	GAPDH	UNKNOWN	SYBR	None	0.839728	0.349927	2.01512	33.0855	33.0275	-0.939685	0.454851	0.252005	TRUE	0.425134	TRUE	3	27	1	84.593
A7	15T	BZRAP1-AS1	UNKNOWN	SYBR	None	0.0810542	0.0593177	0.110756	27.612	27.5659	-4.31546	0.16223	3.62497	TRUE	0.143957	TRUE	3	23	1	90.0053
A8	15T	BZRAP1-AS1	UNKNOWN	SYBR	None	0.0810542	0.0593177	0.110756	27.7454	27.5659	-4.31546	0.16223	3.62497	TRUE	0.143957	TRUE	3	23	1	89.8105
A9	15T	BZRAP1-AS1	UNKNOWN	SYBR	None	0.0810542	0.0593177	0.110756	27.3403	27.5659	-4.31546	0.16223	3.62497	TRUE	0.143957	TRUE	3	23	1	89.8105
B7	15N	BZRAP1-AS1	UNKNOWN	SYBR	None	1	0.85238	1.17319	26.1099	25.9785	-7.94043	0.072407	0	TRUE	0.143957	TRUE	3	21	1	90.0053
B8	15N	BZRAP1-AS1	UNKNOWN	SYBR	None	1	0.85238	1.17319	25.9068	25.9785	-7.94043	0.072407	0	TRUE	0.143957	TRUE	3	21	1	90.0053
B9	15N	BZRAP1-AS1	UNKNOWN	SYBR	None	1	0.85238	1.17319	25.9187	25.9785	-7.94043	0.072407	0	TRUE	0.143957	TRUE	3	21	1	90.0053
C7	X19T	BZRAP1-AS1	UNKNOWN	SYBR	None	0.000368872	7.1961e-05	0.00189083	35.5073	36.242	3.46417	0.740887	11.4046	TRUE	0.143957	TRUE	3	31	1	90.2
C9	X19T	BZRAP1-AS1	UNKNOWN	SYBR	None	0.000368872	7.1961e-05	0.00189083	36.9767	36.242	3.46417	0.740887	11.4046	TRUE	0.143957	TRUE	3	32	1	77.7368
D7	X20N	BZRAP1-AS1	UNKNOWN	SYBR	None	0.00529546	0.00285832	0.00981062	35.7253	35.7229	-0.379398	0.206753	7.56103	TRUE	0.143957	TRUE	3	31	1	90.3947
D9	X20N	BZRAP1-AS1	UNKNOWN	SYBR	None	0.00529546	0.00285832	0.00981062	35.7205	35.7229	-0.379398	0.206753	7.56103	TRUE	0.143957	TRUE	3	31	1	90.0053
E1	15T	GAPDH	UNKNOWN	SYBR	None	0.217254	0.172337	0.273877	31.4301	31.353	-0.528339	0.120351	2.20255	TRUE	0.422349	TRUE	3	25	1	85.1368
E2	15T	GAPDH	UNKNOWN	SYBR	None	0.217254	0.172337	0.273877	31.2627	31.353	-0.528339	0.120351	2.20255	TRUE	0.422349	TRUE	3	25	1	85.1368
E3	15T	GAPDH	UNKNOWN	SYBR	None	0.217254	0.172337	0.273877	31.3662	31.353	-0.528339	0.120351	2.20255	TRUE	0.422349	TRUE	3	24	1	85.1368
F1	15N	GAPDH	UNKNOWN	SYBR	None	1	0.886541	1.12798	31.1861	31.188	-2.73089	0.0545936	0	TRUE	0.422349	TRUE	3	25	1	84.9421
F2	15N	GAPDH	UNKNOWN	SYBR	None	1	0.886541	1.12798	31.1103	31.188	-2.73089	0.0545936	0	TRUE	0.422349	TRUE	3	25	1	84.9421
F3	15N	GAPDH	UNKNOWN	SYBR	None	1	0.886541	1.12798	31.2677	31.188	-2.73089	0.0545936	0	TRUE	0.422349	TRUE	3	24	1	85.1368
G1	X19T	GAPDH	UNKNOWN	SYBR	None	0.530934	0.42586	0.661933	30.9731	30.9604	-1.81749	0.11459	0.913396	TRUE	0.422349	TRUE	3	25	1	84.9421
G2	X19T	GAPDH	UNKNOWN	SYBR	None	0.530934	0.42586	0.661933	30.8448	30.9604	-1.81749	0.11459	0.913396	TRUE	0.422349	TRUE	3	24	1	84.9421
G3	X19T	GAPDH	UNKNOWN	SYBR	None	0.530934	0.42586	0.661933	31.0631	30.9604	-1.81749	0.11459	0.913396	TRUE	0.422349	TRUE	3	24	1	85.1368
H1	X20N	GAPDH	UNKNOWN	SYBR	None	5.27656	3.30258	8.4304	31.0631	30.9718	-5.13048	0.212417	-2.3996	TRUE	0.422349	TRUE	3	25	1	84.7474
H2	X20N	GAPDH	UNKNOWN	SYBR	None	5.27656	3.30258	8.4304	30.8964	30.9718	-5.13048	0.212417	-2.3996	TRUE	0.422349	TRUE	3	25	1	84.9421
H3	X20N	GAPDH	UNKNOWN	SYBR	None	5.27656	3.30258	8.4304	30.956	30.9718	-5.13048	0.212417	-2.3996	TRUE	0.422349	TRUE	3	25	1	84.9421
A4	T11	GAPDH	UNKNOWN	SYBR	None	1.00654	0.772151	1.31208	33.3136	33.0962	2.88684	0.120174	-0.00940259	TRUE	0.383674	TRUE	3	28	1	84.826
A5	T11	GAPDH	UNKNOWN	SYBR	None	1.00654	0.772151	1.31208	32.9812	33.0962	2.88684	0.120174	-0.00940259	TRUE	0.383674	TRUE	3	27	1	84.6329
A6	T11	GAPDH	UNKNOWN	SYBR	None	1.00654	0.772151	1.31208	32.9938	33.0962	2.88684	0.120174	-0.00940259	TRUE	0.383674	TRUE	3	28	1	84.826
A11	T16	GAPDH	UNKNOWN	SYBR	None	1.9674	1.13818	3.40075	34.9684	34.7299	1.91995	0.248099	-0.97629	TRUE	0.383674	TRUE	3	29	1	84.4399
A12	T16	GAPDH	UNKNOWN	SYBR	None	1.9674	1.13818	3.40075	34.4915	34.7299	1.91995	0.248099	-0.97629	TRUE	0.383674	TRUE	3	28	1	84.4399
B4	N11	GAPDH	UNKNOWN	SYBR	None	0.952535	0.628156	1.44442	33.1179	33.4903	2.9664	0.216338	0.0701561	TRUE	0.383674	TRUE	3	27	1	85.0191
B5	N11	GAPDH	UNKNOWN	SYBR	None	0.952535	0.628156	1.44442	33.6904	33.4903	2.9664	0.216338	0.0701561	TRUE	0.383674	TRUE	3	28	1	85.0191
B6	N11	GAPDH	UNKNOWN	SYBR	None	0.952535	0.628156	1.44442	33.6626	33.4903	2.9664	0.216338	0.0701561	TRUE	0.383674	TRUE	3	27	1	85.0191
B10	N16	GAPDH	UNKNOWN	SYBR	None	1.50061	1.37277	1.64036	31.1634	31.1771	2.31069	0.0462689	-0.58555	TRUE	0.383674	TRUE	3	26	1	84.826
B11	N16	GAPDH	UNKNOWN	SYBR	None	1.50061	1.37277	1.64036	31.2173	31.1771	2.31069	0.0462689	-0.58555	TRUE	0.383674	TRUE	3	25	1	84.826
B12	N16	GAPDH	UNKNOWN	SYBR	None	1.50061	1.37277	1.64036	31.1506	31.1771	2.31069	0.0462689	-0.58555	TRUE	0.383674	TRUE	3	25	1	84.6329
C4	T12	GAPDH	UNKNOWN	SYBR	None	3.27938	2.6326	4.08505	28.9679	28.8901	1.18282	0.114151	-1.71342	TRUE	0.383674	TRUE	3	23	1	84.4399
C5	T12	GAPDH	UNKNOWN	SYBR	None	3.27938	2.6326	4.08505	29.0237	28.8901	1.18282	0.114151	-1.71342	TRUE	0.383674	TRUE	3	23	1	85.4052
C6	T12	GAPDH	UNKNOWN	SYBR	None	3.27938	2.6326	4.08505	28.6788	28.8901	1.18282	0.114151	-1.71342	TRUE	0.383674	TRUE	3	23	1	85.4052
C10	T18	GAPDH	UNKNOWN	SYBR	None	0.984696	0.888863	1.09086	32.132	32.1359	2.91849	0.0532035	0.0222499	TRUE	0.383674	TRUE	3	26	1	85.0191
C11	T18	GAPDH	UNKNOWN	SYBR	None	0.984696	0.888863	1.09086	32.2289	32.1359	2.91849	0.0532035	0.0222499	TRUE	0.383674	TRUE	3	27	1	84.826
C12	T18	GAPDH	UNKNOWN	SYBR	None	0.984696	0.888863	1.09086	32.0467	32.1359	2.91849	0.0532035	0.0222499	TRUE	0.383674	TRUE	3	27	1	84.6329
D4	N12	GAPDH	UNKNOWN	SYBR	None	1.82468	1.6476	2.0208	30.9412	30.9769	2.0286	0.0530466	-0.867646	TRUE	0.383674	TRUE	3	25	1	85.4052
D5	N12	GAPDH	UNKNOWN	SYBR	None	1.82468	1.6476	2.0208	31.0105	30.9769	2.0286	0.0530466	-0.867646	TRUE	0.383674	TRUE	3	25	1	85.4052
D6	N12	GAPDH	UNKNOWN	SYBR	None	1.82468	1.6476	2.0208	30.9789	30.9769	2.0286	0.0530466	-0.867646	TRUE	0.383674	TRUE	3	24	1	85.4052
D10	N18	GAPDH	UNKNOWN	SYBR	None	1	0.828445	1.20708	29.9348	29.8068	2.89624	0.097795	0	TRUE	0.383674	TRUE	3	24	1	85.2121
D11	N18	GAPDH	UNKNOWN	SYBR	None	1	0.828445	1.20708	29.6213	29.8068	2.89624	0.097795	0	TRUE	0.383674	TRUE	3	23	1	85.0191
D12	N18	GAPDH	UNKNOWN	SYBR	None	1	0.828445	1.20708	29.8642	29.8068	2.89624	0.097795	0	TRUE	0.383674	TRUE	3	24	1	84.6329
E4	T13	GAPDH	UNKNOWN	SYBR	None	0.852513	0.468673	1.55072	33.1289	33.6909	3.12645	0.31088	0.230206	TRUE	0.383674	TRUE	3	27	1	85.4052
E5	T13	GAPDH	UNKNOWN	SYBR	None	0.852513	0.468673	1.55072	33.9098	33.6909	3.12645	0.31088	0.230206	TRUE	0.383674	TRUE	3	28	1	85.2121
E6	T13	GAPDH	UNKNOWN	SYBR	None	0.852513	0.468673	1.55072	34.0339	33.6909	3.12645	0.31088	0.230206	TRUE	0.383674	TRUE	3	28	1	85.2121
E10	T19	GAPDH	UNKNOWN	SYBR	None	1.8789	1.7539	2.01281	28.7159	28.6685	1.98635	0.0357731	-0.90989	TRUE	0.383674	TRUE	3	23	1	85.2121
E11	T19	GAPDH	UNKNOWN	SYBR	None	1.8789	1.7539	2.01281	28.6588	28.6685	1.98635	0.0357731	-0.90989	TRUE	0.383674	TRUE	3	23	1	85.0191
E12	T19	GAPDH	UNKNOWN	SYBR	None	1.8789	1.7539	2.01281	28.6309	28.6685	1.98635	0.0357731	-0.90989	TRUE	0.383674	TRUE	3	23	1	84.826
F4	N13	GAPDH	UNKNOWN	SYBR	None	0.895495	0.552989	1.45014	35.6584	35.6997	3.05548	0.250477	0.159242	TRUE	0.383674	TRUE	3	30	1	85.0191
F5	N13	GAPDH	UNKNOWN	SYBR	None	0.895495	0.552989	1.45014	35.9118	35.6997	3.05548	0.250477	0.159242	TRUE	0.383674	TRUE	3	30	1	85.0191
F6	N13	GAPDH	UNKNOWN	SYBR	None	0.895495	0.552989	1.45014	35.5288	35.6997	3.05548	0.250477	0.159242	TRUE	0.383674	TRUE	3	29	1	85.0191
F10	N19	GAPDH	UNKNOWN	SYBR	None	0.941386	0.812739	1.0904	29.8587	29.7601	2.98338	0.0763545	0.0871417	TRUE	0.383674	TRUE	3	23	1	85.0191
F11	N19	GAPDH	UNKNOWN	SYBR	None	0.941386	0.812739	1.0904	29.6567	29.7601	2.98338	0.0763545	0.0871417	TRUE	0.383674	TRUE	3	23	1	84.826
F12	N19	GAPDH	UNKNOWN	SYBR	None	0.941386	0.812739	1.0904	29.765	29.7601	2.98338	0.0763545	0.0871417	TRUE	0.383674	TRUE	3	23	1	84.6329
G4	T14	GAPDH	UNKNOWN	SYBR	None	6.22851	5.42701	7.14839	27.242	27.2812	0.257355	0.0715775	-2.63889	TRUE	0.383674	TRUE	3	21	1	85.4052
G5	T14	GAPDH	UNKNOWN	SYBR	None	6.22851	5.42701	7.14839	27.3143	27.2812	0.257355	0.0715775	-2.63889	TRUE	0.383674	TRUE	3	21	1	85.4052
G6	T14	GAPDH	UNKNOWN	SYBR	None	6.22851	5.42701	7.14839	27.2873	27.2812	0.257355	0.0715775	-2.63889	TRUE	0.383674	TRUE	3	21	1	85.4052
G10	T21	GAPDH	UNKNOWN	SYBR	None	0.791885	0.648795	0.966534	32.8055	32.8129	3.23288	0.10356	0.336636	TRUE	0.383674	TRUE	3	27	1	84.826
G11	T21	GAPDH	UNKNOWN	SYBR	None	0.791885	0.648795	0.966534	32.6708	32.8129	3.23288	0.10356	0.336636	TRUE	0.383674	TRUE	3	27	1	84.6329
G12	T21	GAPDH	UNKNOWN	SYBR	None	0.791885	0.648795	0.966534	32.9623	32.8129	3.23288	0.10356	0.336636	TRUE	0.383674	TRUE	3	27	1	84.4399
H4	N14	GAPDH	UNKNOWN	SYBR	None	1.14329	0.663256	1.97073	32.2423	32.3764	2.70306	0.282933	-0.193185	TRUE	0.383674	TRUE	3	26	1	85.0191
H5	N14	GAPDH	UNKNOWN	SYBR	None	1.14329	0.663256	1.97073	32.9021	32.3764	2.70306	0.282933	-0.193185	TRUE	0.383674	TRUE	3	27	1	85.0191
H6	N14	GAPDH	UNKNOWN	SYBR	None	1.14329	0.663256	1.97073	31.9848	32.3764	2.70306	0.282933	-0.193185	TRUE	0.383674	TRUE	3	26	1	85.0191
H10	N21	GAPDH	UNKNOWN	SYBR	None	1.59361	0.648426	3.91656	30.027	29.5909	2.22394	0.407638	-0.6723	TRUE	0.383674	TRUE	3	25	1	84.826
H11	N21	GAPDH	UNKNOWN	SYBR	None	1.59361	0.648426	3.91656	29.9695	29.5909	2.22394	0.407638	-0.6723	TRUE	0.383674	TRUE	3	24	1	84.6329
H12	N21	GAPDH	UNKNOWN	SYBR	None	1.59361	0.648426	3.91656	28.7764	29.5909	2.22394	0.407638	-0.6723	TRUE	0.383674	TRUE	3	23	1	84.2468
A4	mr029	BZRAP1-AS1	UNKNOWN	SYBR	None	0.391387	0.0844339	1.81425	36.9467	36.3009	5.20335	0.695284	1.35333	TRUE	0.286587	TRUE	3	31	1	89.871
A5	mr029	BZRAP1-AS1	UNKNOWN	SYBR	None	0.391387	0.0844339	1.81425	35.655	36.3009	5.20335	0.695284	1.35333	TRUE	0.286587	TRUE	3	30	1	89.871
B4	mr030	BZRAP1-AS1	UNKNOWN	SYBR	None	0.54794	0.494504	0.607151	36.7231	36.7371	4.71792	0.0465166	0.86791	TRUE	0.286587	TRUE	3	31	1	90.0675
B5	mr030	BZRAP1-AS1	UNKNOWN	SYBR	None	0.54794	0.494504	0.607151	36.7511	36.7371	4.71792	0.0465166	0.86791	TRUE	0.286587	TRUE	3	31	1	90.0675
C4	mr091	BZRAP1-AS1	UNKNOWN	SYBR	None	1.58593	1.27072	1.97934	34.324	34.404	3.18469	0.115143	-0.665329	TRUE	0.286587	TRUE	3	29	1	90.2639
C5	mr091	BZRAP1-AS1	UNKNOWN	SYBR	None	1.58593	1.27072	1.97934	34.3761	34.404	3.18469	0.115143	-0.665329	TRUE	0.286587	TRUE	3	29	1	90.2639
C6	mr091	BZRAP1-AS1	UNKNOWN	SYBR	None	1.58593	1.27072	1.97934	34.5118	34.404	3.18469	0.115143	-0.665329	TRUE	0.286587	TRUE	3	29	1	90.2639
D4	mr092	BZRAP1-AS1	UNKNOWN	SYBR	None	1.22289	0.859348	1.74023	34.3801	34.5384	3.55972	0.159934	-0.290296	TRUE	0.286587	TRUE	3	28	1	90.2639
D5	mr092	BZRAP1-AS1	UNKNOWN	SYBR	None	1.22289	0.859348	1.74023	34.6967	34.5384	3.55972	0.159934	-0.290296	TRUE	0.286587	TRUE	3	29	1	90.2639
E5	mr109	BZRAP1-AS1	UNKNOWN	SYBR	None	0.663092	0.153241	2.86928	34.4901	35.1425	4.44273	0.664082	0.592718	TRUE	0.286587	TRUE	3	29	1	90.2639
E6	mr109	BZRAP1-AS1	UNKNOWN	SYBR	None	0.663092	0.153241	2.86928	35.7949	35.1425	4.44273	0.664082	0.592718	TRUE	0.286587	TRUE	3	30	1	90.2639
F4	mr110	BZRAP1-AS1	UNKNOWN	SYBR	None	1	0.75789	1.31945	34.9098	34.8896	3.85001	0.144047	0	TRUE	0.286587	TRUE	3	28	1	90.2639
F5	mr110	BZRAP1-AS1	UNKNOWN	SYBR	None	1	0.75789	1.31945	35.1282	34.8896	3.85001	0.144047	0	TRUE	0.286587	TRUE	3	29	1	90.2639
F6	mr110	BZRAP1-AS1	UNKNOWN	SYBR	None	1	0.75789	1.31945	34.6308	34.8896	3.85001	0.144047	0	TRUE	0.286587	TRUE	3	29	1	90.2639
A10	mr029	GAPDH	UNKNOWN	SYBR	None				31.4823	31.0975				TRUE	0.447485	TRUE	3	25	1	84.5669
A11	mr029	GAPDH	UNKNOWN	SYBR	None				30.6089	31.0975				TRUE	0.447485	TRUE	3	24	1	84.5669
A12	mr029	GAPDH	UNKNOWN	SYBR	None				31.2014	31.0975				TRUE	0.447485	TRUE	3	25	1	84.3704
B10	mr030	GAPDH	UNKNOWN	SYBR	None				32.1075	32.0192				TRUE	0.447485	TRUE	3	25	1	84.7633
B11	mr030	GAPDH	UNKNOWN	SYBR	None				31.9821	32.0192				TRUE	0.447485	TRUE	3	26	1	84.5669
B12	mr030	GAPDH	UNKNOWN	SYBR	None				31.9679	32.0192				TRUE	0.447485	TRUE	3	26	1	84.3704
C10	mr091	GAPDH	UNKNOWN	SYBR	None				31.0753	31.2193				TRUE	0.447485	TRUE	3	25	1	84.7633
C11	mr091	GAPDH	UNKNOWN	SYBR	None				31.413	31.2193				TRUE	0.447485	TRUE	3	25	1	84.7633
C12	mr091	GAPDH	UNKNOWN	SYBR	None				31.1696	31.2193				TRUE	0.447485	TRUE	3	25	1	84.3704
D10	mr092	GAPDH	UNKNOWN	SYBR	None				30.984	30.9787				TRUE	0.447485	TRUE	3	24	1	84.9598
D11	mr092	GAPDH	UNKNOWN	SYBR	None				30.9368	30.9787				TRUE	0.447485	TRUE	3	24	1	84.7633
D12	mr092	GAPDH	UNKNOWN	SYBR	None				31.0152	30.9787				TRUE	0.447485	TRUE	3	25	1	84.5669
E10	mr109	GAPDH	UNKNOWN	SYBR	None				30.5548	30.6998				TRUE	0.447485	TRUE	3	24	1	84.9598
E11	mr109	GAPDH	UNKNOWN	SYBR	None				30.9464	30.6998				TRUE	0.447485	TRUE	3	24	1	84.7633
E12	mr109	GAPDH	UNKNOWN	SYBR	None				30.5981	30.6998				TRUE	0.447485	TRUE	3	24	1	84.5669
F10	mr110	GAPDH	UNKNOWN	SYBR	None				31.0394	31.0396				TRUE	0.447485	TRUE	3	25	1	84.7633
F11	mr110	GAPDH	UNKNOWN	SYBR	None				31.0483	31.0396				TRUE	0.447485	TRUE	3	25	1	84.5669
F12	mr110	GAPDH	UNKNOWN	SYBR	None				31.031	31.0396				TRUE	0.447485	TRUE	3	24	1	84.3704
