# Supplementary material for: Long non-coding RNA BZRAP1-AS1 functions in malignancy and prognosis for non-small-cell lung cancer
Source: PeerJ journal article supplement (doi:10.7717/peerj.13871), 2022-08-23
Supplement: Raw_data.zip [file H1299.xlsx]

## Sheet: Sheet1
time (hours)	H1299					H1299 Negative Control					H1299 BZRAP1-AS1 OE
0	0.0956667	0.115667	0.131667			0.113667	0.105667	0.115667			0.0906667	0.0936667	0.103667
24	0.627333	0.666333	0.597333	0.578333	0.588333	0.541333	0.497333	0.512333	0.487333	0.497333	0.377333	0.279333	0.383333	0.360333	0.371333
48	1.75533	1.71633	1.52233	1.47833	1.53133	1.42233	1.33333	1.35133	1.36133	1.27833	0.940333	0.880333	0.874333	0.858333	0.867333
72	2.86	3.087	3.327	2.714	3.262	2.958	2.665		2.631		2.425		2.425	2.414
