# Supplementary material for: Long non-coding RNA BZRAP1-AS1 functions in malignancy and prognosis for non-small-cell lung cancer
Source: PeerJ journal article supplement (doi:10.7717/peerj.13871), 2022-08-23
Supplement: Raw_data.zip [file HCC827.xlsx]

## Sheet: Sheet1
time(hours)	HCC827					NC					OE
0	0.115667	0.106667	0.123667			0.144667	0.144667	0.162667			0.142667	0.130667	0.148667
24	0.637	0.528	0.647	0.574	0.631	0.497	0.464	0.49	0.492	0.593	0.424	0.371	0.365	0.402	0.364
48	1.202	1.103	1.162	1.152	1.367	0.947	0.908	0.935	0.913	1.03	0.794	0.773	0.786
72	1.85567	1.84567	1.90167	1.89967	1.87767	1.46867	1.47067	1.54767	1.46767	1.59667	1.25067	1.07167	1.21267	1.11967	1.24867
