# Supplementary material for: Long non-coding RNA BZRAP1-AS1 functions in malignancy and prognosis for non-small-cell lung cancer
Source: PeerJ journal article supplement (doi:10.7717/peerj.13871), 2022-08-23
Supplement: Raw_data.zip [file normal tissues in N stage(GTEx).xlsx]

## Sheet: Sheet1
sample	database	BZRAP1-AS1	source	N stage
TCGA-22-4593	TCGA	9	adjacent tissue	0
TCGA-22-4609	TCGA	8.12	adjacent tissue	0
TCGA-22-5471	TCGA	7.65	adjacent tissue	0
TCGA-22-5472	TCGA	7.51	adjacent tissue	0
TCGA-22-5478	TCGA	7.31	adjacent tissue	0
TCGA-22-5482	TCGA	7.28	adjacent tissue	0
TCGA-22-5489	TCGA	7.08	adjacent tissue	0
TCGA-22-5491	TCGA	7.08	adjacent tissue	0
TCGA-33-4587	TCGA	7.02	adjacent tissue	0
TCGA-34-7107	TCGA	6.88	adjacent tissue	0
TCGA-38-4625	TCGA	6.87	adjacent tissue	0
TCGA-38-4626	TCGA	6.85	adjacent tissue	0
TCGA-43-5670	TCGA	6.79	adjacent tissue	0
TCGA-43-6143	TCGA	6.76	adjacent tissue	0
TCGA-43-6771	TCGA	6.73	adjacent tissue	0
TCGA-43-7657	TCGA	6.72	adjacent tissue	0
TCGA-43-7658	TCGA	6.68	adjacent tissue	0
TCGA-44-2655	TCGA	6.65	adjacent tissue	0
TCGA-44-2657	TCGA	6.65	adjacent tissue	0
TCGA-44-2661	TCGA	6.65	adjacent tissue	0
TCGA-44-2662	TCGA	6.61	adjacent tissue	0
TCGA-44-2668	TCGA	6.59	adjacent tissue	0
TCGA-44-3398	TCGA	6.54	adjacent tissue	0
TCGA-44-5645	TCGA	6.54	adjacent tissue	0
TCGA-44-6145	TCGA	6.54	adjacent tissue	0
TCGA-44-6146	TCGA	6.53	adjacent tissue	0
TCGA-44-6147	TCGA	6.49	adjacent tissue	0
TCGA-44-6148	TCGA	6.47	adjacent tissue	0
TCGA-44-6776	TCGA	6.46	adjacent tissue	0
TCGA-44-6777	TCGA	6.43	adjacent tissue	0
TCGA-44-6778	TCGA	6.42	adjacent tissue	0
TCGA-50-5931	TCGA	6.34	adjacent tissue	0
TCGA-50-5935	TCGA	6.31	adjacent tissue	0
TCGA-50-5939	TCGA	6.28	adjacent tissue	0
TCGA-51-4079	TCGA	6.26	adjacent tissue	0
TCGA-55-6968	TCGA	6.16	adjacent tissue	0
TCGA-55-6971	TCGA	6.14	adjacent tissue	0
TCGA-55-6972	TCGA	6.13	adjacent tissue	0
TCGA-55-6978	TCGA	6.11	adjacent tissue	0
TCGA-55-6980	TCGA	6.07	adjacent tissue	0
TCGA-55-6985	TCGA	5.92	adjacent tissue	0
TCGA-55-6986	TCGA	5.92	adjacent tissue	0
TCGA-56-7222	TCGA	5.91	adjacent tissue	0
TCGA-56-7580	TCGA	5.9	adjacent tissue	0
TCGA-56-7582	TCGA	5.9	adjacent tissue	0
TCGA-56-7730	TCGA	5.88	adjacent tissue	0
TCGA-56-7731	TCGA	5.86	adjacent tissue	0
TCGA-56-8082	TCGA	5.85	adjacent tissue	0
TCGA-56-8083	TCGA	5.84	adjacent tissue	0
TCGA-56-8201	TCGA	5.83	adjacent tissue	0
TCGA-56-8309	TCGA	5.78	adjacent tissue	0
TCGA-56-8623	TCGA	5.78	adjacent tissue	0
TCGA-58-8386	TCGA	5.78	adjacent tissue	0
TCGA-60-2709	TCGA	5.77	adjacent tissue	0
TCGA-77-7138	TCGA	5.72	adjacent tissue	0
TCGA-77-7142	TCGA	5.71	adjacent tissue	0
TCGA-77-7338	TCGA	5.58	adjacent tissue	0
TCGA-77-8008	TCGA	5.52	adjacent tissue	0
TCGA-85-7710	TCGA	5.5	adjacent tissue	0
TCGA-90-6837	TCGA	5.45	adjacent tissue	0
TCGA-91-6828	TCGA	5.37	adjacent tissue	0
TCGA-91-6829	TCGA	5.27	adjacent tissue	0
TCGA-91-6831	TCGA	5.26	adjacent tissue	0
TCGA-91-6835	TCGA	5.11	adjacent tissue	0
TCGA-91-6836	TCGA	4.99	adjacent tissue	0
TCGA-91-6847	TCGA	4.87	adjacent tissue	0
TCGA-22-5481	TCGA	7.31	adjacent tissue	1
TCGA-22-5483	TCGA	7.22	adjacent tissue	1
TCGA-34-8454	TCGA	6.88	adjacent tissue	1
TCGA-38-4627	TCGA	6.84	adjacent tissue	1
TCGA-38-4632	TCGA	6.82	adjacent tissue	1
TCGA-43-6647	TCGA	6.75	adjacent tissue	1
TCGA-43-6773	TCGA	6.73	adjacent tissue	1
TCGA-44-2665	TCGA	6.59	adjacent tissue	1
TCGA-49-6742	TCGA	6.4	adjacent tissue	1
TCGA-49-6744	TCGA	6.39	adjacent tissue	1
TCGA-50-5932	TCGA	6.32	adjacent tissue	1
TCGA-51-4081	TCGA	6.16	adjacent tissue	1
TCGA-55-6975	TCGA	6.12	adjacent tissue	1
TCGA-55-6979	TCGA	6.11	adjacent tissue	1
TCGA-55-6982	TCGA	6.02	adjacent tissue	1
TCGA-55-6983	TCGA	6	adjacent tissue	1
TCGA-55-6984	TCGA	5.98	adjacent tissue	1
TCGA-56-7823	TCGA	5.85	adjacent tissue	1
TCGA-73-4676	TCGA	5.74	adjacent tissue	1
TCGA-77-7337	TCGA	5.67	adjacent tissue	1
TCGA-77-8007	TCGA	5.54	adjacent tissue	1
TCGA-90-7767	TCGA	5.38	adjacent tissue	1
TCGA-92-7340	TCGA	3.99	adjacent tissue	1
TCGA-33-6737	TCGA	6.89	adjacent tissue	2
TCGA-39-5040	TCGA	6.81	adjacent tissue	2
TCGA-44-3396	TCGA	6.57	adjacent tissue	2
TCGA-49-4490	TCGA	6.42	adjacent tissue	2
TCGA-49-4512	TCGA	6.42	adjacent tissue	2
TCGA-49-6743	TCGA	6.4	adjacent tissue	2
TCGA-49-6745	TCGA	6.38	adjacent tissue	2
TCGA-49-6761	TCGA	6.37	adjacent tissue	2
TCGA-50-5930	TCGA	6.35	adjacent tissue	2
TCGA-50-5933	TCGA	6.31	adjacent tissue	2
TCGA-50-5936	TCGA	6.3	adjacent tissue	2
TCGA-50-6595	TCGA	6.28	adjacent tissue	2
TCGA-55-6970	TCGA	6.15	adjacent tissue	2
TCGA-55-6981	TCGA	6.03	adjacent tissue	2
TCGA-77-7335	TCGA	5.69	adjacent tissue	2
TCGA-91-6849	TCGA	4.62	adjacent tissue	2
GTEx-1	GTEX	8.61	normal tissue	5
GTEx-2	GTEX	8.52	normal tissue	5
GTEx-3	GTEX	8.23	normal tissue	5
GTEx-4	GTEX	8.18	normal tissue	5
GTEx-5	GTEX	8.15	normal tissue	5
GTEx-6	GTEX	8.07	normal tissue	5
GTEx-7	GTEX	8.03	normal tissue	5
GTEx-8	GTEX	7.98	normal tissue	5
GTEx-9	GTEX	7.97	normal tissue	5
GTEx-10	GTEX	7.96	normal tissue	5
GTEx-11	GTEX	7.9	normal tissue	5
GTEx-12	GTEX	7.86	normal tissue	5
GTEx-13	GTEX	7.84	normal tissue	5
GTEx-14	GTEX	7.81	normal tissue	5
GTEx-15	GTEX	7.73	normal tissue	5
GTEx-16	GTEX	7.7	normal tissue	5
GTEx-17	GTEX	7.7	normal tissue	5
GTEx-18	GTEX	7.69	normal tissue	5
GTEx-19	GTEX	7.69	normal tissue	5
GTEx-20	GTEX	7.68	normal tissue	5
GTEx-21	GTEX	7.65	normal tissue	5
GTEx-22	GTEX	7.65	normal tissue	5
GTEx-23	GTEX	7.64	normal tissue	5
GTEx-24	GTEX	7.63	normal tissue	5
GTEx-25	GTEX	7.62	normal tissue	5
GTEx-26	GTEX	7.61	normal tissue	5
GTEx-27	GTEX	7.6	normal tissue	5
GTEx-28	GTEX	7.58	normal tissue	5
GTEx-29	GTEX	7.58	normal tissue	5
GTEx-30	GTEX	7.56	normal tissue	5
GTEx-31	GTEX	7.56	normal tissue	5
GTEx-32	GTEX	7.56	normal tissue	5
GTEx-33	GTEX	7.55	normal tissue	5
GTEx-34	GTEX	7.54	normal tissue	5
GTEx-35	GTEX	7.52	normal tissue	5
GTEx-36	GTEX	7.48	normal tissue	5
GTEx-37	GTEX	7.48	normal tissue	5
GTEx-38	GTEX	7.48	normal tissue	5
GTEx-39	GTEX	7.48	normal tissue	5
GTEx-40	GTEX	7.45	normal tissue	5
GTEx-41	GTEX	7.45	normal tissue	5
GTEx-42	GTEX	7.42	normal tissue	5
GTEx-43	GTEX	7.42	normal tissue	5
GTEx-44	GTEX	7.41	normal tissue	5
GTEx-45	GTEX	7.37	normal tissue	5
GTEx-46	GTEX	7.36	normal tissue	5
GTEx-47	GTEX	7.35	normal tissue	5
GTEx-48	GTEX	7.34	normal tissue	5
GTEx-49	GTEX	7.34	normal tissue	5
GTEx-50	GTEX	7.32	normal tissue	5
GTEx-51	GTEX	7.32	normal tissue	5
GTEx-52	GTEX	7.31	normal tissue	5
GTEx-53	GTEX	7.3	normal tissue	5
GTEx-54	GTEX	7.3	normal tissue	5
GTEx-55	GTEX	7.28	normal tissue	5
GTEx-56	GTEX	7.28	normal tissue	5
GTEx-57	GTEX	7.28	normal tissue	5
GTEx-58	GTEX	7.27	normal tissue	5
GTEx-59	GTEX	7.26	normal tissue	5
GTEx-60	GTEX	7.26	normal tissue	5
GTEx-61	GTEX	7.26	normal tissue	5
GTEx-62	GTEX	7.22	normal tissue	5
GTEx-63	GTEX	7.21	normal tissue	5
GTEx-64	GTEX	7.21	normal tissue	5
GTEx-65	GTEX	7.2	normal tissue	5
GTEx-66	GTEX	7.17	normal tissue	5
GTEx-67	GTEX	7.15	normal tissue	5
GTEx-68	GTEX	7.15	normal tissue	5
GTEx-69	GTEX	7.15	normal tissue	5
GTEx-70	GTEX	7.12	normal tissue	5
GTEx-71	GTEX	7.12	normal tissue	5
GTEx-72	GTEX	7.11	normal tissue	5
GTEx-73	GTEX	7.09	normal tissue	5
GTEx-74	GTEX	7.08	normal tissue	5
GTEx-75	GTEX	7.08	normal tissue	5
GTEx-76	GTEX	7.08	normal tissue	5
GTEx-77	GTEX	7.08	normal tissue	5
GTEx-78	GTEX	7.06	normal tissue	5
GTEx-79	GTEX	6.99	normal tissue	5
GTEx-80	GTEX	6.97	normal tissue	5
GTEx-81	GTEX	6.96	normal tissue	5
GTEx-82	GTEX	6.95	normal tissue	5
GTEx-83	GTEX	6.93	normal tissue	5
GTEx-84	GTEX	6.93	normal tissue	5
GTEx-85	GTEX	6.91	normal tissue	5
GTEx-86	GTEX	6.91	normal tissue	5
GTEx-87	GTEX	6.9	normal tissue	5
GTEx-88	GTEX	6.9	normal tissue	5
GTEx-89	GTEX	6.89	normal tissue	5
GTEx-90	GTEX	6.88	normal tissue	5
GTEx-91	GTEX	6.88	normal tissue	5
GTEx-92	GTEX	6.86	normal tissue	5
GTEx-93	GTEX	6.85	normal tissue	5
GTEx-94	GTEX	6.85	normal tissue	5
GTEx-95	GTEX	6.84	normal tissue	5
GTEx-96	GTEX	6.82	normal tissue	5
GTEx-97	GTEX	6.82	normal tissue	5
GTEx-98	GTEX	6.82	normal tissue	5
GTEx-99	GTEX	6.81	normal tissue	5
GTEx-100	GTEX	6.81	normal tissue	5
GTEx-101	GTEX	6.81	normal tissue	5
GTEx-102	GTEX	6.81	normal tissue	5
GTEx-103	GTEX	6.79	normal tissue	5
GTEx-104	GTEX	6.79	normal tissue	5
GTEx-105	GTEX	6.77	normal tissue	5
GTEx-106	GTEX	6.76	normal tissue	5
GTEx-107	GTEX	6.76	normal tissue	5
GTEx-108	GTEX	6.75	normal tissue	5
GTEx-109	GTEX	6.74	normal tissue	5
GTEx-110	GTEX	6.7	normal tissue	5
GTEx-111	GTEX	6.69	normal tissue	5
GTEx-112	GTEX	6.68	normal tissue	5
GTEx-113	GTEX	6.67	normal tissue	5
GTEx-114	GTEX	6.67	normal tissue	5
GTEx-115	GTEX	6.66	normal tissue	5
GTEx-116	GTEX	6.66	normal tissue	5
GTEx-117	GTEX	6.64	normal tissue	5
GTEx-118	GTEX	6.64	normal tissue	5
GTEx-119	GTEX	6.64	normal tissue	5
GTEx-120	GTEX	6.62	normal tissue	5
GTEx-121	GTEX	6.62	normal tissue	5
GTEx-122	GTEX	6.61	normal tissue	5
GTEx-123	GTEX	6.6	normal tissue	5
GTEx-124	GTEX	6.6	normal tissue	5
GTEx-125	GTEX	6.59	normal tissue	5
GTEx-126	GTEX	6.59	normal tissue	5
GTEx-127	GTEX	6.59	normal tissue	5
GTEx-128	GTEX	6.57	normal tissue	5
GTEx-129	GTEX	6.57	normal tissue	5
GTEx-130	GTEX	6.57	normal tissue	5
GTEx-131	GTEX	6.56	normal tissue	5
GTEx-132	GTEX	6.56	normal tissue	5
GTEx-133	GTEX	6.56	normal tissue	5
GTEx-134	GTEX	6.55	normal tissue	5
GTEx-135	GTEX	6.53	normal tissue	5
GTEx-136	GTEX	6.53	normal tissue	5
GTEx-137	GTEX	6.53	normal tissue	5
GTEx-138	GTEX	6.52	normal tissue	5
GTEx-139	GTEX	6.51	normal tissue	5
GTEx-140	GTEX	6.5	normal tissue	5
GTEx-141	GTEX	6.49	normal tissue	5
GTEx-142	GTEX	6.48	normal tissue	5
GTEx-143	GTEX	6.46	normal tissue	5
GTEx-144	GTEX	6.46	normal tissue	5
GTEx-145	GTEX	6.46	normal tissue	5
GTEx-146	GTEX	6.45	normal tissue	5
GTEx-147	GTEX	6.45	normal tissue	5
GTEx-148	GTEX	6.44	normal tissue	5
GTEx-149	GTEX	6.43	normal tissue	5
GTEx-150	GTEX	6.43	normal tissue	5
GTEx-151	GTEX	6.42	normal tissue	5
GTEx-152	GTEX	6.41	normal tissue	5
GTEx-153	GTEX	6.41	normal tissue	5
GTEx-154	GTEX	6.41	normal tissue	5
GTEx-155	GTEX	6.4	normal tissue	5
GTEx-156	GTEX	6.4	normal tissue	5
GTEx-157	GTEX	6.4	normal tissue	5
GTEx-158	GTEX	6.38	normal tissue	5
GTEx-159	GTEX	6.37	normal tissue	5
GTEx-160	GTEX	6.37	normal tissue	5
GTEx-161	GTEX	6.35	normal tissue	5
GTEx-162	GTEX	6.33	normal tissue	5
GTEx-163	GTEX	6.32	normal tissue	5
GTEx-164	GTEX	6.31	normal tissue	5
GTEx-165	GTEX	6.3	normal tissue	5
GTEx-166	GTEX	6.3	normal tissue	5
GTEx-167	GTEX	6.3	normal tissue	5
GTEx-168	GTEX	6.29	normal tissue	5
GTEx-169	GTEX	6.28	normal tissue	5
GTEx-170	GTEX	6.28	normal tissue	5
GTEx-171	GTEX	6.28	normal tissue	5
GTEx-172	GTEX	6.27	normal tissue	5
GTEx-173	GTEX	6.26	normal tissue	5
GTEx-174	GTEX	6.26	normal tissue	5
GTEx-175	GTEX	6.26	normal tissue	5
GTEx-176	GTEX	6.24	normal tissue	5
GTEx-177	GTEX	6.23	normal tissue	5
GTEx-178	GTEX	6.23	normal tissue	5
GTEx-179	GTEX	6.22	normal tissue	5
GTEx-180	GTEX	6.22	normal tissue	5
GTEx-181	GTEX	6.21	normal tissue	5
GTEx-182	GTEX	6.21	normal tissue	5
GTEx-183	GTEX	6.2	normal tissue	5
GTEx-184	GTEX	6.2	normal tissue	5
GTEx-185	GTEX	6.19	normal tissue	5
GTEx-186	GTEX	6.16	normal tissue	5
GTEx-187	GTEX	6.16	normal tissue	5
GTEx-188	GTEX	6.16	normal tissue	5
GTEx-189	GTEX	6.15	normal tissue	5
GTEx-190	GTEX	6.15	normal tissue	5
GTEx-191	GTEX	6.15	normal tissue	5
GTEx-192	GTEX	6.12	normal tissue	5
GTEx-193	GTEX	6.12	normal tissue	5
GTEx-194	GTEX	6.09	normal tissue	5
GTEx-195	GTEX	6.08	normal tissue	5
GTEx-196	GTEX	6.08	normal tissue	5
GTEx-197	GTEX	6.07	normal tissue	5
GTEx-198	GTEX	6.07	normal tissue	5
GTEx-199	GTEX	6.07	normal tissue	5
GTEx-200	GTEX	6.01	normal tissue	5
GTEx-201	GTEX	6.01	normal tissue	5
GTEx-202	GTEX	5.98	normal tissue	5
GTEx-203	GTEX	5.97	normal tissue	5
GTEx-204	GTEX	5.97	normal tissue	5
GTEx-205	GTEX	5.97	normal tissue	5
GTEx-206	GTEX	5.96	normal tissue	5
GTEx-207	GTEX	5.95	normal tissue	5
GTEx-208	GTEX	5.95	normal tissue	5
GTEx-209	GTEX	5.94	normal tissue	5
GTEx-210	GTEX	5.93	normal tissue	5
GTEx-211	GTEX	5.93	normal tissue	5
GTEx-212	GTEX	5.92	normal tissue	5
GTEx-213	GTEX	5.92	normal tissue	5
GTEx-214	GTEX	5.91	normal tissue	5
GTEx-215	GTEX	5.91	normal tissue	5
GTEx-216	GTEX	5.91	normal tissue	5
GTEx-217	GTEX	5.89	normal tissue	5
GTEx-218	GTEX	5.87	normal tissue	5
GTEx-219	GTEX	5.86	normal tissue	5
GTEx-220	GTEX	5.86	normal tissue	5
GTEx-221	GTEX	5.86	normal tissue	5
GTEx-222	GTEX	5.86	normal tissue	5
GTEx-223	GTEX	5.84	normal tissue	5
GTEx-224	GTEX	5.84	normal tissue	5
GTEx-225	GTEX	5.83	normal tissue	5
GTEx-226	GTEX	5.82	normal tissue	5
GTEx-227	GTEX	5.82	normal tissue	5
GTEx-228	GTEX	5.81	normal tissue	5
GTEx-229	GTEX	5.81	normal tissue	5
GTEx-230	GTEX	5.8	normal tissue	5
GTEx-231	GTEX	5.79	normal tissue	5
GTEx-232	GTEX	5.78	normal tissue	5
GTEx-233	GTEX	5.76	normal tissue	5
GTEx-234	GTEX	5.75	normal tissue	5
GTEx-235	GTEX	5.74	normal tissue	5
GTEx-236	GTEX	5.73	normal tissue	5
GTEx-237	GTEX	5.72	normal tissue	5
GTEx-238	GTEX	5.71	normal tissue	5
GTEx-239	GTEX	5.69	normal tissue	5
GTEx-240	GTEX	5.69	normal tissue	5
GTEx-241	GTEX	5.67	normal tissue	5
GTEx-242	GTEX	5.66	normal tissue	5
GTEx-243	GTEX	5.63	normal tissue	5
GTEx-244	GTEX	5.61	normal tissue	5
GTEx-245	GTEX	5.59	normal tissue	5
GTEx-246	GTEX	5.59	normal tissue	5
GTEx-247	GTEX	5.56	normal tissue	5
GTEx-248	GTEX	5.54	normal tissue	5
GTEx-249	GTEX	5.54	normal tissue	5
GTEx-250	GTEX	5.54	normal tissue	5
GTEx-251	GTEX	5.53	normal tissue	5
GTEx-252	GTEX	5.49	normal tissue	5
GTEx-253	GTEX	5.47	normal tissue	5
GTEx-254	GTEX	5.44	normal tissue	5
GTEx-255	GTEX	5.43	normal tissue	5
GTEx-256	GTEX	5.42	normal tissue	5
GTEx-257	GTEX	5.4	normal tissue	5
GTEx-258	GTEX	5.38	normal tissue	5
GTEx-259	GTEX	5.37	normal tissue	5
GTEx-260	GTEX	5.36	normal tissue	5
GTEx-261	GTEX	5.35	normal tissue	5
GTEx-262	GTEX	5.3	normal tissue	5
GTEx-263	GTEX	5.29	normal tissue	5
GTEx-264	GTEX	5.22	normal tissue	5
GTEx-265	GTEX	5.22	normal tissue	5
GTEx-266	GTEX	5.21	normal tissue	5
GTEx-267	GTEX	5.17	normal tissue	5
GTEx-268	GTEX	5.17	normal tissue	5
GTEx-269	GTEX	5.14	normal tissue	5
GTEx-270	GTEX	5.14	normal tissue	5
GTEx-271	GTEX	5.08	normal tissue	5
GTEx-272	GTEX	5.04	normal tissue	5
GTEx-273	GTEX	5	normal tissue	5
GTEx-274	GTEX	4.99	normal tissue	5
GTEx-275	GTEX	4.92	normal tissue	5
GTEx-276	GTEX	4.85	normal tissue	5
GTEx-277	GTEX	4.82	normal tissue	5
GTEx-278	GTEX	4.79	normal tissue	5
GTEx-279	GTEX	4.78	normal tissue	5
GTEx-280	GTEX	4.68	normal tissue	5
GTEx-281	GTEX	4.57	normal tissue	5
GTEx-282	GTEX	4.56	normal tissue	5
GTEx-283	GTEX	4.56	normal tissue	5
GTEx-284	GTEX	4.44	normal tissue	5
GTEx-285	GTEX	4.4	normal tissue	5
GTEx-286	GTEX	4.37	normal tissue	5
GTEx-287	GTEX	4.32	normal tissue	5
GTEx-288	GTEX	0	normal tissue	5
