# Supplementary material for: Long non-coding RNA BZRAP1-AS1 functions in malignancy and prognosis for non-small-cell lung cancer
Source: PeerJ journal article supplement (doi:10.7717/peerj.13871), 2022-08-23
Supplement: Raw_data.zip [file TCGA data.xlsx]

## Sheet: Sheet1
Sample ID	BZRAP1-AS1(tumor tissues)	BZRAP1-AS1(adjacent normal tissues)	SEX	OS	Histologic type	follow-up outcome	T stage	N stage	M stage	TNM_Stage	A8_New_Event	A8_New_Event_Time	A8_New_Event_Type	A9_Cancer_Status	AGE	tumor location	EGFR	residual_tumor	smoking index
TCGA-18-3406	10		MALE	371	LUSC	Dead	T1	N0	M0	Stage IA	1	357	Locoregional Recurrence	WITH TUMOR	67	L-Upper	Not Available	R0	200
TCGA-18-3407	25		MALE	136	LUSC	Dead	T2	N0	M0	Stage IB	0	136		TUMOR FREE	72	L-Upper	Not Available	R0	40
TCGA-18-3408	23		FEMALE	2304	LUSC	Dead	T2	N0	M0	Stage IB	1	1793	Locoregional Recurrence	WITH TUMOR	77	R-Lower	Not Available	R0	30
TCGA-18-3409	31		MALE	3747	LUSC	Alive	T1	N0	M0	Stage IA	1	2291	New Primary Tumor	TUMOR FREE	74	L-Upper	Not Available	R0	20
TCGA-18-3410	233		MALE	146	LUSC	Dead	T3	N0	M0	Stage IIB	0	146		TUMOR FREE	81	R-Lower	Not Available	R0	Not Available
TCGA-18-3411	38		FEMALE	3576	LUSC	Alive	T2	N2	M0	Stage IIIA	0	3576		TUMOR FREE	63	R-Upper	Not Available	R0	50
TCGA-18-3412	36		MALE	345	LUSC	Dead	T2	N0	M0	Stage IB	1	273	Distant Metastasis	WITH TUMOR	52	L-Lower	Not Available	R0	25
TCGA-18-3414	24		MALE	716	LUSC	Dead	T4	N1	M1	Stage IV	0	716		TUMOR FREE	73	R-Lower	Not Available	R0	25
TCGA-18-3415	28		MALE	2803	LUSC	Dead	T2	N0	M0	Stage IB	0	2803		TUMOR FREE	77	R-Upper	Not Available	R0	30
TCGA-18-3416	87		MALE	973	LUSC	Dead	T2	N1	M0	Stage IIB	1	940	Distant Metastasis	WITH TUMOR	83	L-Upper	Not Available	R0	40
TCGA-18-3417	8		MALE	1097	LUSC	Dead	T2	N1	M1	Stage IV	0	1097		TUMOR FREE	65	R-Upper	Not Available	R0	25
TCGA-18-3419	27		MALE	2811	LUSC	Alive	T2	N1	M0	Stage IIB	0	2811		TUMOR FREE	73	L-Lower	Not Available	R0	50
TCGA-18-3421	8		MALE	2645	LUSC	Alive	T2	N0	M0	Stage IB	0	2645		TUMOR FREE	65	R-Lower	Not Available	R0	40
TCGA-18-4083	79		MALE	188	LUSC	Dead	T2	N1	M0	Stage IIB	0	188		TUMOR FREE	63	L-Lower	Not Available	R0	45
TCGA-18-4086	48		MALE	85	LUSC	Dead	T2	N0	M0	Stage IB	0	85		TUMOR FREE	64	R-Lower	Not Available	R0	30
TCGA-18-4721	24		MALE	4694	LUSC	Alive	T1	N0	M0	Stage IA	0	4694		TUMOR FREE	74	L-Lower	Not Available	R0	Not Available
TCGA-18-5592	53		MALE	1519	LUSC	Alive	T3	N0	M0	Stage IIB	0	1519		TUMOR FREE	57	L-Upper	Not Available	R0	40
TCGA-18-5595	21		MALE	827	LUSC	Dead	T2	N0	M0	Stage IB	0	827		Not Available	50	R-Lower	Not Available	R0	Not Available
TCGA-21-1070	63		FEMALE	3636	LUSC	Alive	T3	N0	M0	Stage IIIA	0	3636		TUMOR FREE	60	L-Upper	Not Available	R0	15
TCGA-21-1071	22		MALE	1426	LUSC	Dead	T2	N0	M0	Stage IB	1	993		Not Available	67	R-Upper	Not Available	R0	90
TCGA-21-1072	33		MALE	3016	LUSC	Alive	T2	N0	M0	Stage IB	0	3016		TUMOR FREE	75	Discrepancy	Not Available	R0	Not Available
TCGA-21-1075	12		MALE	2134	LUSC	Alive	T2	N1	M0	Stage IIB	0	2134		TUMOR FREE	57	L-Lower	Not Available	R0	74
TCGA-21-1076	86		FEMALE	1852	LUSC	Alive	T2	N0	M0	Stage IB	1	1575		TUMOR FREE	54	L-Lower	Not Available	R0	35
TCGA-21-1077	26		MALE	1058	LUSC	Dead	T2	N1	M0	Stage IIB	1	644		WITH TUMOR	64	R-Upper	Not Available	R0	56
TCGA-21-1078	16		MALE	474	LUSC	Dead	T2	N0	M0	Stage IB	1	257		WITH TUMOR	77	R-Lower	Not Available	R0	9
TCGA-21-1079	3		MALE	965	LUSC	Dead	T3	N0	M0	Stage IIIA	1	317		WITH TUMOR	71	L-Upper	Not Available	R0	80
TCGA-21-1080	25		MALE	3724	LUSC	Alive	T2	N0	M0	Stage IB	0	3724		TUMOR FREE	66	L-Lower	Not Available	R0	100
TCGA-21-1081	44		MALE	284	LUSC	Dead	T2	N1	M0	Stage IIB	1			WITH TUMOR	69	L-Lower	Not Available	R0	45
TCGA-21-1082	56		MALE	3644	LUSC	Alive	T2	N0	M0	Stage IB	0	3644		TUMOR FREE	61	L-Lower	Not Available	R0	Not Available
TCGA-21-1083	82		MALE	1315	LUSC	Dead	T1	N0	M0	Stage IA	0	1315		TUMOR FREE	75	L-Upper	Not Available	R0	240
TCGA-21-5782	25		FEMALE	962	LUSC	Dead	T2	N0	M0	Stage IB	0	962		Not Available	68	L-Lower	Not Available	R0	48
TCGA-21-5783	36		MALE	2680	LUSC	Dead	T2	N0	M0	Stage IB	0	2680		Not Available	76	L-Upper	NO	R0	Not Available
TCGA-21-5784	23		FEMALE	1268	LUSC	Alive	T2	N0	M0	Stage IB	0	1268		TUMOR FREE	80	R-Upper	Not Available	R0	14
TCGA-21-5786	23		MALE	1032	LUSC	Alive	T2	N0	M0	Stage IB	1	817	Locoregional Recurrence	TUMOR FREE	64	R-Upper	Not Available	R0	75
TCGA-21-5787	55		MALE	329	LUSC	Dead	T2	N2	M0	Stage IIIA	1	103		WITH TUMOR	65	L-Upper	Not Available	R0	100
TCGA-21-A5DI	14		MALE	979	LUSC	Alive	T1b	N0	M0	Stage IA	0	979		Unknown	77	R-Lower	Not Available	R0	Not Available
TCGA-22-0940	62		MALE	669	LUSC	Dead	T1	N1	M0	Stage IIA	1			WITH TUMOR	71	L-Lower	NO	R0	25
TCGA-22-0944	24		MALE	223	LUSC	Dead	T2	N0	M0	Stage IB	0	223		TUMOR FREE	61	L-Upper	NO	R0	38
TCGA-22-1000	74		MALE	454	LUSC	Dead	T2	N0	M0	Stage IB	1	263		WITH TUMOR	76	R-Lower	NO	R0	40
TCGA-22-1002	40		MALE	131	LUSC	Dead	T1	N0	M0	Stage IA	0	131		TUMOR FREE	69	R-Middle	NO	R0	85
TCGA-22-1005	70		MALE	1953	LUSC	Dead	T1	N0	M0	Stage IA	0	1953		TUMOR FREE	63	R-Upper	NO	R0	40
TCGA-22-1011	74		MALE	53	LUSC	Dead	T2	N0	M0	Stage IB	0	53		TUMOR FREE	73	R-Upper	NO	R0	83
TCGA-22-1012	27		FEMALE	429	LUSC	Dead	T2	N0	M0	Stage IB	0	429		TUMOR FREE	80	R-Lower	NO	R0	60
TCGA-22-1016	77		MALE	822	LUSC	Dead	T2	N0	M0	Stage IB	0	822		TUMOR FREE	65	R-Upper	NO	R0	40
TCGA-22-1017	33		MALE	1485	LUSC	Dead	T1	N0	M0	Stage IA	1	904	Locoregional Recurrence	WITH TUMOR	62	L-Upper	NO	R0	Not Available
TCGA-22-4591	94		MALE	623	LUSC	Dead	T3	N2	M0	Stage IIIA	1	443		WITH TUMOR	80	R-Lower	NO	R0	Not Available
TCGA-22-4593	49	100	MALE	1067	LUSC	Dead	T2b	N0	M0	Stage IIA	0	1067		TUMOR FREE	77	R-Lower	NO	R0	30
TCGA-22-4594	74		FEMALE	1470	LUSC	Dead	T3	N2	M0	Stage IIIA	0	1470		Not Available	60	L-Upper	NO	R0	40
TCGA-22-4595	43		MALE	734	LUSC	Dead	T3	N2		Stage IIIA	1	250		WITH TUMOR	57	L-Lower	NO	R0	37
TCGA-22-4596	128		FEMALE	17	LUSC	Dead	T1b	N0	M0	Stage IB	0	17		TUMOR FREE	69	L-Upper	NO	R0	40
TCGA-22-4599	21		FEMALE	1161	LUSC	Dead	T2a	N0	M0	Stage IB	0	1161		Not Available	73	Not Available	NO	R0	25
TCGA-22-4601	11		FEMALE	1057	LUSC	Dead	T4	N0	M0	Stage IIIA	1	525		WITH TUMOR	73	R-Upper	NO	R0	60
TCGA-22-4604	99		MALE	399	LUSC	Dead	T2a	N1	M0	Stage IIA	1	306		WITH TUMOR	73	L-Upper	NO	R0	50
TCGA-22-4605	39		FEMALE	974	LUSC	Dead	T2	N0	M0	Stage IB	0	974		TUMOR FREE	78	R-Upper	NO	R0	75
TCGA-22-4607	108		MALE	587	LUSC	Dead	T2a	N0	M0	Stage IB	0	587		TUMOR FREE	75	R-Lower	NO	R0	20
TCGA-22-4609	76	98	MALE	291	LUSC	Dead	T1	N0	M0	Stage IA	0	291		TUMOR FREE	81	R-Upper	NO	R0	77
TCGA-22-4613	37		FEMALE	358	LUSC	Dead	T1b	N0	M0	Stage IA	0	358		Not Available	73	L-Upper	NO	R0	30
TCGA-22-5471	68	69	MALE	1845	LUSC	Alive	T2	N0	M0	Stage IB	1	229		Not Available	75	L-Lower	NO	R2	50
TCGA-22-5472	35	111	MALE	1975	LUSC	Dead	T2a	N0	M0	Stage IB	1	746		Discrepancy	67	R-Lower	NO	R0	35
TCGA-22-5473	65		MALE	1933	LUSC	Dead	T3	N0	M0		1	1655		TUMOR FREE	78	Discrepancy	NO	R0	45
TCGA-22-5474	148		MALE	445	LUSC	Dead	T2a	N0	M0	Stage IB	0	445		TUMOR FREE	74	L-Upper	NO	R0	50
TCGA-22-5477	66		MALE	1346	LUSC	Dead	T1	N0	M0	Stage IA	1	511		Not Available	65	R-Lower	NO	R0	100
TCGA-22-5478	51	161	MALE	24	LUSC	Dead	T2a	N0	M0	Stage IB	0	24		TUMOR FREE	79	R-Lower	NO	R0	Not Available
TCGA-22-5479	25		MALE	2625	LUSC	Dead	T2	N0	M0	Stage IB	0	2625		Not Available	64	L-Lower	NO	R0	35
TCGA-22-5480	228		FEMALE	2170	LUSC	Dead	T1b	N0	M0	Stage IA	1	1779		WITH TUMOR	66	L-Upper	NO	R0	50
TCGA-22-5481	83	97	FEMALE	2409	LUSC	Dead	T2	N1	M0	Stage IIB	1	346		Not Available	72	L-Lower	NO	R0	75
TCGA-22-5482	91	156	MALE	357	LUSC	Dead	T2a	N0	M0	Stage IB	0	357		TUMOR FREE	81	L-Upper	NO	R0	60
TCGA-22-5483	364	87	MALE	573	LUSC	Dead	T1a	N1	M0	Stage IIA	1	568		WITH TUMOR	74	R-Upper	NO	R0	50
TCGA-22-5485	81		FEMALE	916	LUSC	Dead	T1a	N0	M0	Stage IA	1	840		WITH TUMOR	58	R-Upper	NO	R0	60
TCGA-22-5489	163	111	MALE	1912	LUSC	Dead	T1b	N0	M0	Stage IA	1	428		WITH TUMOR	64	L-Upper	NO	R0	70
TCGA-22-5491	46	92	MALE	1713	LUSC	Dead	T1a	N0	M0	Stage IA	0	1713		Not Available	74	L-Lower	NO	R0	57
TCGA-22-5492	120		FEMALE	506	LUSC	Dead	T2a	N2	M0	Stage IIIA	0	506		Not Available	73	L-Upper	NO	R0	50
TCGA-22-A5C4	38		MALE	671	LUSC	Alive	T2b	N0	M0	Stage IIA	0	671		TUMOR FREE	70	R-Lower	NO	R0	80
TCGA-33-4532	21		MALE	3924	LUSC	Dead	T2	N0	M0	Stage IB	0	3924		TUMOR FREE	68	R-Lower	Not Available	R0	53
TCGA-33-4533	131		FEMALE	4068	LUSC	Alive	T2	N0	M0	Stage IB	0	4068		TUMOR FREE	76	L-Upper	Not Available	R0	50
TCGA-33-4538	41		MALE	2979	LUSC	Dead	T2	N2	M0	Stage IIIA	0	2979		Not Available	66	L-Upper	Not Available	RX	51
TCGA-33-4547	38		MALE	2419	LUSC	Alive	T2	N0	M0	Stage IB	0	2419		TUMOR FREE	68	R-Upper	Not Available	R0	40
TCGA-33-4566	9		MALE	5287	LUSC	Dead	T2	N0	M0	Stage IB	0	5287		Not Available	40	R-Upper	Not Available	R0	20
TCGA-33-4582	13		MALE	3149	LUSC	Dead	T1	N0	M0	Stage IA	1	2923	Locoregional Recurrence	Not Available	55	L-Lower	Not Available	R0	86
TCGA-33-4583	2		MALE	4601	LUSC	Dead	T1	N0	M0	Stage IA	0	4601		Not Available	73	L-Lower	Not Available	R0	46
TCGA-33-4586	36		MALE	428	LUSC	Dead	T2	N2	M0	Stage IIIA	1	169	Locoregional Recurrence	Not Available	57	L-Lower	Not Available	Not Available	108
TCGA-33-4587	82	77	FEMALE	1656	LUSC	Dead	T2	N0	MX	Stage IB	1			WITH TUMOR	63	R-Middle	Not Available	R0	Not Available
TCGA-33-4589	5		FEMALE	47	LUSC	Dead	T2	N1	M0	Stage IIB	0	47		Not Available	62	R-Lower	Not Available	Not Available	45
TCGA-33-6737	31	108	MALE	601	LUSC	Dead	T2	N2	M0	Stage IIIA	1			WITH TUMOR	71	R-Upper	Not Available	Not Available	20
TCGA-33-6738	24		MALE	1927	LUSC	Alive	T1	N2	MX	Stage IIIA	0	1927		TUMOR FREE	80	L-Upper	Not Available	Not Available	50
TCGA-33-A4WN	35		MALE	143	LUSC	Dead	T2a	N0	MX	Stage IB	0	143		TUMOR FREE	60	R-Upper	Not Available	R0	60
TCGA-33-A5GW	17		MALE	9	LUSC	Alive	T1a	N1	MX	Stage IIA	0	9		TUMOR FREE	67	R-Lower	Not Available	R0	50
TCGA-33-AAS8	44		FEMALE	1114	LUSC	Dead	T1	N0	MX	Stage IA	0	1114		TUMOR FREE	59	R-Upper	Not Available	R0	60
TCGA-33-AASB	29		MALE	211	LUSC	Dead	T2	N0	MX	Stage IB	1	30	Distant Metastasis	WITH TUMOR	66	L-Upper	Not Available	R0	40
TCGA-33-AASD	39		MALE	2249	LUSC	Dead	T1	N0	MX	Stage IA	1	1912	Locoregional Recurrence	WITH TUMOR	83	R-Lower	Not Available	R0	84
TCGA-33-AASI	21		FEMALE	1344	LUSC	Dead	T2	N1	MX	Stage IIB	0	1344		WITH TUMOR	65	L-Lower	Not Available	RX	60
TCGA-33-AASJ	25		MALE	3600	LUSC	Dead	T2	N0	MX	Stage IB	1	1135	Locoregional Recurrence	WITH TUMOR	60	R-Lower	Not Available	R0	Not Available
TCGA-33-AASL	41		FEMALE	826	LUSC	Dead	T1	N0	MX	Stage IA	1	149	Locoregional Recurrence	WITH TUMOR	57	R-Upper	Not Available	R0	60
TCGA-34-2596	108		MALE	80	LUSC	Dead	T2	N1	M0	Stage IIB	0	80		TUMOR FREE	70	Bronchial	Not Available	R0	60
TCGA-34-2600	55		FEMALE	1874	LUSC	Dead	T1	N0	M0	Stage IA	0	1874		Not Available	76	R-Lower	Not Available	R0	50
TCGA-34-2608	48		MALE	1000	LUSC	Dead	T2	N0	M0	Stage IB	0	1000		TUMOR FREE	84	L-Upper	Not Available	R0	60
TCGA-34-5231	70		MALE	1984	LUSC	Dead	T1	N0	M0	Stage IA	0	1984		TUMOR FREE	72	R-Upper	YES	Not Available	50
TCGA-34-5232	223		FEMALE	2471	LUSC	Alive	T1	N1	M0	Stage IIA	0	2471		TUMOR FREE	75	L-Upper	YES	Not Available	Not Available
TCGA-34-5234	55		FEMALE	2271	LUSC	Alive	T1	N0	M0	Stage IA	0	2271		TUMOR FREE	71	L-Upper	NO	R0	40
TCGA-34-5236	31		MALE	276	LUSC	Dead	T3	N0	M0	Stage IIB	1	113	Locoregional Recurrence	WITH TUMOR	60	L-Upper	YES	Not Available	Not Available
TCGA-34-5239	202		MALE	1834	LUSC	Alive	T4	N0	M0	Stage IIIA	1	1530	Distant Metastasis	WITH TUMOR	75	L-Upper	YES	Not Available	Not Available
TCGA-34-5240	48		FEMALE	1541	LUSC	Alive	T2	N1	M0	Stage IIB	0	1541		TUMOR FREE	73	L-Upper	NO	Not Available	56
TCGA-34-5241	53		MALE	515	LUSC	Dead	T2	N0	M0	Stage IB	0	515		TUMOR FREE	79	R-Lower	Not Available	Not Available	25
TCGA-34-5927	164		FEMALE	1361	LUSC	Alive	T1	N0	M0	Stage IA	1	245	Distant Metastasis	Not Available	70	R-Lower	Not Available	Not Available	Not Available
TCGA-34-5928	108		FEMALE	1196	LUSC	Alive	T2	N1	M0	Stage IIB	0	1196		TUMOR FREE	83	L-Lower	Not Available	Not Available	40
TCGA-34-5929	143		FEMALE	151	LUSC	Dead	T2	N0	M0	Stage IB	0	151		TUMOR FREE	78	L-Upper	YES	Not Available	40
TCGA-34-7107	65	81	MALE	34	LUSC	Dead	T2a	N0	M0	Stage II	0	34		Not Available	70	R-Lower	Not Available	Not Available	Not Available
TCGA-34-8454	101	134	FEMALE	1180	LUSC	Alive	T3	N1	M0	Stage IIIA	0	1180		TUMOR FREE	62	R-Lower	Not Available	R0	90
TCGA-34-8455	22		MALE	123	LUSC	Dead	T4	N0	M1a	Stage IV	1			WITH TUMOR	67	L-Upper	Not Available	R0	50
TCGA-34-8456	73		FEMALE	804	LUSC	Alive	T2a	N1	M0	Stage IIA	0	804		TUMOR FREE	71	R-Lower	Not Available	R0	20
TCGA-34-A5IX	19		MALE	1031	LUSC	Alive	T3	N0	M0	Stage IIB	0	1031		TUMOR FREE	80	R-Lower	Not Available	Not Available	Not Available
TCGA-37-3783	51		MALE	122	LUSC	Alive	T3	N2	M0	Stage IIIA	0	122		TUMOR FREE	51	L-Upper	NO	R0	Not Available
TCGA-37-3789	17		MALE	13	LUSC	Alive	T2	N0		Stage IB	0	13		TUMOR FREE	65	L-Upper	NO	R0	Not Available
TCGA-37-3792	60		MALE	12	LUSC	Alive	T2	N0	M0	Stage IB	0	12		TUMOR FREE	69	R-Upper	NO	R0	Not Available
TCGA-37-4129	62		FEMALE	242	LUSC	Alive	T1b	N0	M0	Stage IA	0	242		TUMOR FREE	52	R-Middle	NO	R0	30
TCGA-37-4130	74		MALE	247	LUSC	Alive	T1b	N0	M0	Stage IA	0	247		TUMOR FREE	56	R-Upper	NO	R0	25
TCGA-37-4132	99		FEMALE	227	LUSC	Alive	T2	N0	M1	Stage IV	0	227		TUMOR FREE	61	L-Lower	NO	R0	Not Available
TCGA-37-4133	29		MALE	238	LUSC	Alive	T4	N0	M0	Stage IIIA	0	238		TUMOR FREE	63	R-Lower	NO	R0	40
TCGA-37-4135	23		MALE	207	LUSC	Alive	T2a	N0	M0	Stage IB	0	207		TUMOR FREE	68	R-Lower	NO	R0	45
TCGA-37-4141	156		FEMALE	12	LUSC	Alive	T1b	N0	M0	Stage IA	0	12		TUMOR FREE	65	R-Upper	NO	R0	Not Available
TCGA-37-5819	74		MALE	103	LUSC	Alive	T2	N2	M0	Stage IIIA	0	103		TUMOR FREE	64	R-Upper	Not Available	R0	45
TCGA-37-A5EL	111		MALE	1143	LUSC	Dead	T3	N0	M0	Stage IIB	1	946	Distant Metastasis	TUMOR FREE	53	L-Upper	Not Available	Not Evaluated	Not Available
TCGA-37-A5EM	20		MALE	867	LUSC	Alive	T2	N0	M0	Stage II	0	867		TUMOR FREE	49	L-Upper	Not Available	Not Evaluated	Not Available
TCGA-37-A5EN	41		MALE	660	LUSC	Alive	T4	N2	M0	Stage IIIB	0	660		TUMOR FREE	59	R-Middle	Not Available	Not Available	Not Available
TCGA-39-5011	51		FEMALE	4053	LUSC	Alive	T1b	N0	M0	Stage IA	1	565		TUMOR FREE	70	R-Lower	NO	R0	45
TCGA-39-5016	117		MALE	3850	LUSC	Alive	T2a	N1	M0	Stage IIA	0	3850		TUMOR FREE	44	R-Lower	NO	R0	40
TCGA-39-5019	81		MALE	3387	LUSC	Alive	T2a	N0	M0	Stage IB	1	378		TUMOR FREE	70	R-Upper	NO	R0	30
TCGA-39-5021	33		MALE	2086	LUSC	Dead	T2a	N0	M0	Stage IB	1	1875		WITH TUMOR	70	L-Upper	NO	R0	114
TCGA-39-5022	148		MALE	1679	LUSC	Dead	T2a	N0	M0	Stage IB	1	1448		TUMOR FREE	76	R-Upper	NO	R0	35
TCGA-39-5024	37		FEMALE	2510	LUSC	Alive	T2a	N2	M0	Stage IIIA	0	2510		TUMOR FREE	65	Bronchial	NO	R0	40
TCGA-39-5027	37		MALE	3108	LUSC	Alive	T2a	N0	M0	Stage IB	1	3081	New Primary Tumor	TUMOR FREE	73	R-Lower	NO	R0	40
TCGA-39-5028	42		MALE	52	LUSC	Dead	T4	N1	M0	Stage IIIA	0	52		Not Available	75	R-Upper	NO	R0	30
TCGA-39-5029	37		MALE	740	LUSC	Dead	T1b	N2	M0	Stage IIIA	1	491		WITH TUMOR	67	L-Lower	NO	R0	192
TCGA-39-5030	99		FEMALE	59	LUSC	Dead	T2a	N2	M0	Stage IIIA	0	59		Not Available	81	L-Lower	NO	R0	8
TCGA-39-5031	111		FEMALE	1841	LUSC	Dead	T1a	N0	M0	Stage IA	0	1841		TUMOR FREE	76	L-Upper	NO	R0	60
TCGA-39-5034	7		FEMALE	1107	LUSC	Dead	T3	N0	M0	Stage IIB	1	352		Not Available	73	R-Upper	YES	R0	84
TCGA-39-5035	57		FEMALE	2080	LUSC	Alive	T1b	N0	M0	Stage IA	0	2080		TUMOR FREE	72	R-Lower	NO	R0	47
TCGA-39-5036	20		MALE	2165	LUSC	Alive	T2	N0	M0	Stage IB	0	2165		TUMOR FREE	73	L-Upper	NO	R0	63
TCGA-39-5037	24		MALE	1690	LUSC	Alive	T1b	N1	M0	Stage IIA	0	1690		TUMOR FREE	65	L-Lower	NO	R0	26
TCGA-39-5039	20		MALE	544	LUSC	Dead	T2b	N0	M0	Stage IIA	0	544		TUMOR FREE	76	R-Upper	NO	R0	64
TCGA-39-5040	30	85	MALE	519	LUSC	Dead	T2a	N2	M0	Stage IIIA	1	442		WITH TUMOR	59	L-Upper	NO	R0	60
TCGA-43-2576	29		FEMALE	1223	LUSC	Alive	T2	N2	M0	Stage IIIA	0	1223		TUMOR FREE	62	L-Upper	Not Available	R0	20
TCGA-43-2578	120		FEMALE	550	LUSC	Alive	T1	N0	M0	Stage IA	0	550		TUMOR FREE	59	L-Upper	Not Available	R0	64
TCGA-43-2581	25		FEMALE	1176	LUSC	Alive	T3	N1	M0	Stage IIIA	0	1176		TUMOR FREE	47	R-Upper	Not Available	R0	30
TCGA-43-3394	46		MALE	1190	LUSC	Dead	T2a	N0	M0	Stage IB	1	552		TUMOR FREE	52	L-Lower	Not Available	R0	15
TCGA-43-3920	33		MALE	1007	LUSC	Alive	T2	N0	M0	Stage IB	0	1007		TUMOR FREE	71	R-Upper	Not Available	R0	50
TCGA-43-5668	142		MALE	559	LUSC	Dead	T1b	N1	M0	Stage IIA	1	470		TUMOR FREE	78	R-Upper	Not Available	Not Available	20
TCGA-43-5670	26	115	MALE	849	LUSC	Alive	T2b	N0	M0	Stage IIA	0	849		TUMOR FREE	70	L-Lower	Not Available	Not Available	30
TCGA-43-6143	83	181	MALE	699	LUSC	Alive	T2	N0	M0	Stage IB	0	699		TUMOR FREE	70	R-Lower	Not Available	RX	114
TCGA-43-6647	69	167	FEMALE	757	LUSC	Alive	T2b	N1	MX	Stage IIB	0	757		TUMOR FREE	69	R-Lower	Not Available	RX	36
TCGA-43-6770	56		FEMALE	653	LUSC	Alive	T2a	N0	MX	Stage IB	0	653		TUMOR FREE	59	L-Upper	Not Available	RX	34
TCGA-43-6771	13	92	MALE	166	LUSC	Dead	T2	N0	MX	Stage IB	1	154		WITH TUMOR	85	L-Upper	Not Available	RX	40
TCGA-43-6773	61	37	MALE	116	LUSC	Dead	T2	N1	MX	Stage IIB	0	116		TUMOR FREE	76	R-Lower	Not Available	Not Available	Not Available
TCGA-43-7656	165		MALE	596	LUSC	Alive	T1b	N0	MX	Stage IA	0	596		TUMOR FREE	71	R-Lower	Not Available	Not Available	45
TCGA-43-7657	71	114	FEMALE	236	LUSC	Alive	T1	N0	MX	Stage IA	0	236		Not Available	68	R-Upper	Not Available	Not Available	45
TCGA-43-7658	186	106	FEMALE	2378	LUSC	Dead	T1	N0	M0	Stage IA	1	2305	Distant Metastasis	TUMOR FREE	75	R-Upper	Not Available	Not Available	12
TCGA-43-8115	72		FEMALE	407	LUSC	Alive	T2a	N1	MX	Stage IIA	0	407		TUMOR FREE	72	L-Lower	Unknown	R0	55.83
TCGA-43-8116	49		MALE	358	LUSC	Alive	T1b	N0	M0	Stage IA	0	358		TUMOR FREE	73	L-Upper	Unknown	Not Available	35
TCGA-43-8118	70		FEMALE	89	LUSC	Dead	T1b	N0	M0	Stage IA	0	89		Unknown	55	R-Upper	NO	Not Evaluated	20
TCGA-43-A474	9		MALE	353	LUSC	Alive	T2b	N0	M0	Stage IIA	0	353		TUMOR FREE	66	L-Upper	Not Available	R0	47
TCGA-43-A475	129		FEMALE	296	LUSC	Alive	T3	N0	M0	Stage IIB	0	296		TUMOR FREE	67	R-Upper	Not Available	R1	100
TCGA-43-A56U	126		FEMALE	432	LUSC	Alive	T1b	N0	MX	Stage IA	0	432		TUMOR FREE	76	L-Upper	Not Available	R0	20.5
TCGA-43-A56V	15		MALE	366	LUSC	Alive	T2a	N2	M0	Stage IIIA	1	355	Locoregional Recurrence	TUMOR FREE	61	R-Middle	Not Available	Not Available	48
TCGA-46-3765	23		FEMALE	405	LUSC	Alive	T1	N0	M0	Stage IA	0	405		TUMOR FREE	59	R-Upper	NO	R0	Not Available
TCGA-46-3766	65		FEMALE	370	LUSC	Alive	T1	N0	M0	Stage IA	0	370		TUMOR FREE	62	R-Lower	NO	R0	Not Available
TCGA-46-3767	59		MALE	396	LUSC	Alive	T1a	N0	M0	Stage IA	0	396		TUMOR FREE	76	L-Lower	NO	R0	Not Available
TCGA-46-3768	21		MALE	299	LUSC	Dead	T3	N1	M0	Stage IIIA	0	299		TUMOR FREE	58	L-Upper	NO	R0	Not Available
TCGA-46-3769	33		MALE	135	LUSC	Alive	T4	N0	M0		0	135		TUMOR FREE	57	R-Upper	YES	R1	Not Available
TCGA-46-6025	7		MALE	324	LUSC	Alive	T2b	N1	M0	Stage IIB	0	324		TUMOR FREE	71	R-Lower	NO	R0	Not Available
TCGA-46-6026	66		MALE	423	LUSC	Alive	T2a	N1	M0	Stage IIB	0	423		TUMOR FREE	81	R-Lower	NO	R2	Not Available
TCGA-51-4079	12	183	FEMALE	12	LUSC	Dead	T2	N0		Stage IB	0	12		Not Available	73	R-Upper	NO	R0	25
TCGA-51-4080	43		MALE	12	LUSC	Dead	T4	N1		Stage IIIB	0	12		Not Available	65	R-Upper	NO	R0	Not Available
TCGA-51-4081	29	266	MALE	911	LUSC	Alive	T2a	N1	M0	Stage IIB	0	911		WITH TUMOR	55	R-Upper	NO	R0	80
TCGA-51-6867	108		FEMALE	1856	LUSC	Dead	T1	N0	M0	Stage I	1	788		WITH TUMOR	72	R-Upper	NO	R0	40
TCGA-52-7622	67		FEMALE	862	LUSC	Alive	T1a	N0	M0	Stage IA	0	862		TUMOR FREE	62	R-Lower	NO	R0	22
TCGA-52-7809	81		MALE	166	LUSC	Dead	T2	N0	M0	Stage IB	1			WITH TUMOR	74	R-Upper	NO	R0	60
TCGA-52-7810	26		FEMALE	923	LUSC	Alive	T3	N0	M0	Stage IIB	0	923		TUMOR FREE	60	R-Upper	NO	Not Available	20
TCGA-52-7811	16		MALE	266	LUSC	Dead	T2	N0	M0	Stage IB	1	153	Distant Metastasis	WITH TUMOR	67	L-Lower	NO	R0	50
TCGA-52-7812	26		MALE	835	LUSC	Dead	T2	N2	M0		1	791	Distant Metastasis	WITH TUMOR	68	L-Upper	NO	R0	30
TCGA-56-1622	21		MALE	881	LUSC	Dead	T2	N0	M0	Stage IB	1			WITH TUMOR	58	R-Lower	Not Available	R0	86
TCGA-56-5897	63		MALE	378	LUSC	Alive	T1b	N0	MX	Stage IA	0	378		TUMOR FREE	74	R-Upper	Not Available	Not Available	Not Available
TCGA-56-5898	26		MALE	555	LUSC	Alive	T1b	N0	M0	Stage IA	0	555		TUMOR FREE	69	R-Upper	Not Available	R0	Not Available
TCGA-56-6545	105		FEMALE	666	LUSC	Alive	T2a	N0	M0	Stage IB	0	666		TUMOR FREE	77	R-Upper	Not Available	R0	Not Available
TCGA-56-6546	55		MALE		LUSC		T2b	N0	MX	Stage IIA	0			TUMOR FREE	67	R-Upper	Not Available	Not Available	Not Available
TCGA-56-7221	29		MALE	608	LUSC	Alive	T2	N0	M0	Stage IB	0	608		TUMOR FREE	79	R-Lower	Not Available	R0	25
TCGA-56-7222	40	51	MALE	562	LUSC	Dead	T2a	N0	M0	Stage IB	1	427		TUMOR FREE	60	R-Upper	NO	Not Available	23
TCGA-56-7223	146		MALE	442	LUSC	Dead	T3	N1	MX	Stage IIIA	1	132	Locoregional Recurrence	TUMOR FREE	66	R-Lower	Not Available	R0	Not Available
TCGA-56-7579	9	93	MALE	951	LUSC	Dead	T3	N1	M0	Stage IIIA	1	149	Locoregional Recurrence	TUMOR FREE	61	L-Upper	Not Available	R0	2
TCGA-56-7580	39	74	MALE	925	LUSC	Alive	T2a	N0	M0	Stage IB	0	925		TUMOR FREE	84	L-Lower	Not Available	R0	Not Available
TCGA-56-7582	39	87	MALE	601	LUSC	Alive	T2a	N0	M0	Stage IB	0	601		TUMOR FREE	83	R-Lower	Not Available	R0	Not Available
TCGA-56-7730	18	51	MALE	198	LUSC	Dead	T2b	N0	M0	Stage IIA	1			WITH TUMOR	73	R-Upper	Not Available	R1	Not Available
TCGA-56-7731	32	50	FEMALE	3	LUSC	Dead	T2a	N0	MX	Stage IB	0	3		TUMOR FREE	66	R-Upper	Not Available	Not Available	100
TCGA-56-7822	23		MALE	532	LUSC	Dead	T2b	N1	M0	Stage IIB	1	301		WITH TUMOR	75	R-Upper	Not Available	R0	60
TCGA-56-7823	33	91	FEMALE	1011	LUSC	Alive	T1b	N1	M0	Stage IIA	0	1011		WITH TUMOR	58	R-Upper	Not Available	Not Available	80
TCGA-56-8082	21	81	FEMALE	455	LUSC	Alive	T2b	N0	MX	Stage IIA	0	455		TUMOR FREE	80	R-Lower	Unknown	R0	Not Available
TCGA-56-8083	42	58	MALE	150	LUSC	Alive	T2a	N0	MX	Stage IB	0	150		TUMOR FREE	56	L-Upper	Unknown	R0	30
TCGA-56-8201	48	80	MALE	397	LUSC	Dead	T3	N0	MX	Stage IIB	1			TUMOR FREE	74	R-Upper	Unknown	R0	Not Available
TCGA-56-8304	15		FEMALE	106	LUSC	Alive	T1b	N0	MX	Stage IA	0	106		TUMOR FREE	73	R-Upper	Unknown	R0	58
TCGA-56-8305	20		MALE	105	LUSC	Alive	T2a	N0	M0	Stage IB	0	105		TUMOR FREE	72	R-Upper	Unknown	R0	100
TCGA-56-8307	70		FEMALE	818	LUSC	Alive	T3	N0	M0	Stage IIB	0	818		TUMOR FREE	55	R-Lower	Unknown	R0	35
TCGA-56-8308	28		MALE	517	LUSC	Alive	T3	N0	MX	Stage IIB	1			Unknown	79	L-Upper	Not Available	R1	63
TCGA-56-8309	114	35	MALE	428	LUSC	Alive	T1b	N0	MX	Stage IA	0	428		TUMOR FREE	66	R-Lower	Not Available	R0	50
TCGA-56-8503	39		FEMALE	41	LUSC	Alive	T3	N0	M0	Stage IIB	0	41		TUMOR FREE	76	R-Lower	Unknown	R0	91
TCGA-56-8504	9		MALE	510	LUSC	Alive	T2a	N0	MX	Stage IB	0	510		TUMOR FREE	74	L-Upper	Unknown	R0	Not Available
TCGA-56-8622	20		MALE	55	LUSC	Alive	T2a	N0	M0	Stage IB	0	55		TUMOR FREE	68	R-Lower	Unknown	R0	40
TCGA-56-8623	158	115	MALE	692	LUSC	Dead	T2a	N0	MX	Stage IB	1	645	New Primary Tumor	Unknown	71	R-Upper	Unknown	R0	45
TCGA-56-8624	32		MALE	420	LUSC	Alive	T3	N0	MX	Stage IIB	0	420		TUMOR FREE	84	R-Lower	YES	R0	20
TCGA-56-8625	69		FEMALE	315	LUSC	Dead	T3	N1	MX	Stage IIIA	1	272	Distant Metastasis	Unknown	66	R-Lower	Unknown	RX	Not Available
TCGA-56-8626	32		MALE	302	LUSC	Dead	T1a	N0	MX	Stage IA	0	302		TUMOR FREE	59	L-Upper	Unknown	R0	50
TCGA-56-8628	72		MALE	616	LUSC	Alive	T1b	N0	MX	Stage IA	0	616		TUMOR FREE	78	R-Upper	Unknown	R0	Not Available
TCGA-56-8629	13		MALE	481	LUSC	Alive	T2b	N0	MX	Stage IIA	0	481		TUMOR FREE	63	L-Lower	NO	R0	66
TCGA-56-A49D	50		MALE	637	LUSC	Alive	T2a	N2	MX	Stage IIIA	0	637		Unknown	67	L-Upper	Unknown	R0	53
TCGA-56-A4BW	30		MALE	585	LUSC	Alive	T2a	N1	M0	Stage IIA	0	585		Unknown	55	L-Upper	Unknown	R0	120
TCGA-56-A4BX	23		MALE	405	LUSC	Alive	T2b	N0	MX	Stage IIA	0	405		TUMOR FREE	70	R-Lower	NO	R0	83
TCGA-56-A4BY	63		MALE	543	LUSC	Dead	T2a	N0	MX	Stage IB	1			TUMOR FREE	66	L-Upper	NO	RX	65
TCGA-56-A4ZJ	46		FEMALE	640	LUSC	Alive	T1a	N0	M0	Stage IA	0	640		TUMOR FREE	75	R-Lower	Unknown	R0	100
TCGA-56-A4ZK	61		FEMALE	570	LUSC	Alive	T2	N0	M0	Stage IB	0	570		WITH TUMOR	76	R-Lower	NO	R1	Not Available
TCGA-56-A5DR	22		MALE	4	LUSC	Alive	T1a	N0	MX	Stage IA	0	4		TUMOR FREE	81	L-Upper	NO	R0	Not Available
TCGA-56-A5DS	69		FEMALE	8	LUSC	Alive	T2a	N0	MX	Stage IB	0	8		TUMOR FREE	72	R-Lower	NO	R0	50
TCGA-56-A62T	18		MALE	440	LUSC	Alive	T2b	N0	MX	Stage IIA	0	440		WITH TUMOR	78	L-Upper	NO	R1	102
TCGA-58-8386	57	78	MALE	1	LUSC	Dead	T3	NX	M1	Stage IV	0	1		TUMOR FREE	75	R-Upper	NO	R0	65
TCGA-58-8387	37		MALE	403	LUSC	Dead	T2b	N0	M0	Stage IIA	0	403		TUMOR FREE	60	R-Lower	NO	R0	40
TCGA-58-8388	166		MALE	412	LUSC	Dead	T2a	N0	M0	Stage IB	0	412		TUMOR FREE	60	L-Upper	NO	R0	80
TCGA-58-8390	56		MALE	911	LUSC	Alive	T2b	N0	M0	Stage IIA	0	911		TUMOR FREE	70	R-Lower	NO	R0	120
TCGA-58-8391	36		FEMALE	2167	LUSC	Alive	T2	N2	M0	Stage IIIA	1	2033	Distant Metastasis	TUMOR FREE	57	Bronchial	NO	R0	30
TCGA-58-8392	35		MALE	501	LUSC	Dead	T2a	N0	M0	Stage IB	1	96	Distant Metastasis	WITH TUMOR	70	L-Upper	YES	R0	80
TCGA-58-8393	79		FEMALE	1058	LUSC	Alive	T2a	N0	M0	Stage IB	0	1058		TUMOR FREE	68	R-Lower	NO	R0	7
TCGA-58-A46J	36		MALE	2589	LUSC	Alive	T2	N1	M0	Stage IIB	0	2589		TUMOR FREE	64	R-Upper	NO	R0	Not Available
TCGA-58-A46K	30		MALE	1045	LUSC	Dead	T2	N2	M0	Stage IIIA	1	735	Locoregional Recurrence	WITH TUMOR	59	R-Lower	NO	R0	10
TCGA-58-A46L	97		MALE	1723	LUSC	Alive	T2	N2	M0	Stage IIIA	0	1723		TUMOR FREE	73	R-Upper	NO	R0	Not Available
TCGA-58-A46M	45		MALE	1072	LUSC	Alive	T2b	N1	M0	Stage IIB	0	1072		TUMOR FREE	61	L-Lower	NO	R0	Not Available
TCGA-58-A46N	32		MALE	910	LUSC	Alive	T2a	N0	M0	Stage IB	1	630	Locoregional Recurrence	TUMOR FREE	52	R-Lower	NO	R0	50
TCGA-60-2695	75		FEMALE	642	LUSC	Alive	T2	N0	M0	Stage IB	0	642		TUMOR FREE	74	L-Upper	NO	R0	64
TCGA-60-2696	14		FEMALE	109	LUSC	Dead	T2	N0	M0	Stage IIA	0	109		Not Available	76	L-Upper	NO	RX	15
TCGA-60-2697	164		MALE	372	LUSC	Dead	T2	N2	M0	Stage IIA	1	200		WITH TUMOR	41	R-Middle	NO	RX	Not Available
TCGA-60-2698	65		MALE	311	LUSC	Dead	T2	N1	M0	Stage IIB	1	114		WITH TUMOR	62	R-Lower	NO	RX	Not Available
TCGA-60-2703	19		MALE	2945	LUSC	Dead	T2	N1	M0	Stage IIB	1	1757		Not Available	73	R-Lower	NO	R0	50
TCGA-60-2704	108		MALE	1154	LUSC	Dead	T2	N1	M0	Stage IIB	1	532		WITH TUMOR	73	R-Upper	NO	R0	60
TCGA-60-2706	92		MALE	2820	LUSC	Alive	T1	N0	M0	Stage IA	0	2820		TUMOR FREE	58	R-Upper	NO	Not Available	51
TCGA-60-2707	25		MALE	667	LUSC	Dead	T2	N0	M0	Stage IB	1	579		WITH TUMOR	70	L-Upper	NO	RX	49
TCGA-60-2708	22		FEMALE	2447	LUSC	Alive	T2	N1	M0	Stage IIB	0	2447		TUMOR FREE	64	L-Lower	NO	R0	20
TCGA-60-2709	82	133	MALE	1505	LUSC	Alive	T2	N0	MX	Stage IB	0	1505		TUMOR FREE	69	L-Upper	NO	R0	157.5
TCGA-60-2710	91		FEMALE	2024	LUSC	Alive	T1	N1	M0	Stage IIA	0	2024		TUMOR FREE	67	L-Upper	NO	Not Available	63
TCGA-60-2711	56		FEMALE	1260	LUSC	Alive	T2	N0	M0	Stage IB	0	1260		TUMOR FREE	64	R-Lower	NO	R0	39
TCGA-60-2712	135		FEMALE	274	LUSC	Dead	T2	N1	M0	Stage IIB	0	274		Not Available	79	L-Upper	NO	R0	10
TCGA-60-2713	69		MALE	1731	LUSC	Alive	T2	N0	M0	Stage IB	1	1356		Not Available	64	R-Lower	NO	R0	110
TCGA-60-2714	57		FEMALE	1531	LUSC	Alive	T2	N1	M0	Stage IIB	0	1531		TUMOR FREE	66	R-Upper	NO	R0	90
TCGA-60-2715	127		MALE	1075	LUSC	Dead	T1	N0	M0	Stage IA	1			WITH TUMOR	51	L-Upper	NO	RX	25
TCGA-60-2716	38		MALE	1475	LUSC	Alive	T2	N1	M0	Stage IIB	0	1475		TUMOR FREE	39	L-Upper	NO	R0	Not Available
TCGA-60-2719	57		FEMALE	1297	LUSC	Alive	T1	N0	M0	Stage IB	0	1297		TUMOR FREE	83	R-Upper	NO	R0	7
TCGA-60-2720	7		FEMALE	97	LUSC	Alive	T2	N0	M0	Stage IB	0	97		TUMOR FREE	60	R-Lower	NO	R0	110
TCGA-60-2721	76		MALE	983	LUSC	Alive	T2	N0	M0	Stage IB	0	983		TUMOR FREE	73	R-Upper	NO	R0	93
TCGA-60-2722	7		MALE	908	LUSC	Alive	T2	N1	M0	Stage IIB	1	851		TUMOR FREE	66	R-Upper	NO	R0	90
TCGA-60-2723	43		FEMALE	1092	LUSC	Alive	T2	N0	M0	Stage IB	0	1092		TUMOR FREE	74	R-Middle	NO	R0	58
TCGA-60-2724	29		MALE	717	LUSC	Alive	T3	N1	M0	Stage IIIA	0	717		TUMOR FREE	47	Bronchial	NO	R0	60
TCGA-60-2725	54		MALE	816	LUSC	Alive	T2	N0	M0	Stage IB	0	816		TUMOR FREE	74	L-Upper	NO	R0	56
TCGA-60-2726	38		MALE	358	LUSC	Dead	T2	N1	M0	Stage IIA	0	358		TUMOR FREE	56	R-Middle	NO	R0	42
TCGA-63-5128	20		MALE		LUSC		T2	N0	M0	Stage IB	1			WITH TUMOR	Not Available	L-Upper	NO	R0	Not Available
TCGA-63-5131	31		MALE		LUSC		T2	N1	M0	Stage IIB	0			TUMOR FREE	Not Available	R-Lower	NO	R0	50
TCGA-63-6202	89		MALE	1602	LUSC	Alive	T2	N0	M0	Stage IIA	0	1602		TUMOR FREE	Not Available	R-Upper	Not Available	R0	35
TCGA-63-7020	36		MALE	2133	LUSC	Alive	T1	N0	M0	Stage IA	0	2133		TUMOR FREE	Not Available	R-Upper	Not Available	R0	50
TCGA-63-7021	34		MALE	2142	LUSC	Alive	T1	N0	M0	Stage IA	1	1503	New Primary Tumor	TUMOR FREE	Not Available	L-Upper	Not Available	R0	21
TCGA-63-7022	72		FEMALE	2073	LUSC	Alive	T1	N0	M0	Stage IA	0	2073		TUMOR FREE	Not Available	L-Upper	Not Available	R0	30
TCGA-63-7023	71		MALE	1682	LUSC	Alive	T1	N1	M0	Stage IIA	0	1682		TUMOR FREE	Not Available	L-Lower	Not Available	R0	55
TCGA-63-A5M9	22		FEMALE	0	LUSC	Alive	T2	N1	M0	Stage IIB	0	0		Unknown	Not Available	L-Lower	Unknown	RX	25
TCGA-63-A5MB	78		MALE	3123	LUSC	Alive	T2	N0	M0	Stage IB	0	3123		TUMOR FREE	62	L-Upper	NO	R0	25
TCGA-63-A5MG	25		MALE	2148	LUSC	Alive	T2	N0	M0	Stage IB	0	2148		TUMOR FREE	68	L-Lower	NO	R0	Not Available
TCGA-63-A5MH	82		MALE	2026	LUSC	Alive	T1	N0	M0	Stage IA	0	2026		TUMOR FREE	68	L-Lower	NO	R0	35
TCGA-63-A5MI	51		MALE	1784	LUSC	Alive	T2	N2	M0	Stage IIIA	0	1784		TUMOR FREE	65	Bronchial	NO	R0	50
TCGA-63-A5MJ	25		MALE	1824	LUSC	Alive	T2	N1	M0	Stage IIB	0	1824		TUMOR FREE	54	Other (please specify)	NO	R0	Not Available
TCGA-63-A5ML	43		MALE	1386	LUSC	Alive	T2	N0	M0	Stage IB	0	1386		TUMOR FREE	68	R-Lower	NO	R0	60
TCGA-63-A5MM	33		FEMALE	456	LUSC	Dead	T2	N1	M0	Stage IIB	1	218	Locoregional Recurrence	WITH TUMOR	69	Bronchial	NO	R0	30
TCGA-63-A5MN	91		FEMALE	345	LUSC	Dead	T3	N0	M0	Stage IIB	1	320	Distant Metastasis	WITH TUMOR	78	R-Upper	NO	R1	Not Available
TCGA-63-A5MP	132		MALE	769	LUSC	Alive	T2	N1	M0	Stage IIB	1	511	Locoregional Recurrence	WITH TUMOR	56	R-Lower	NO	R0	41
TCGA-63-A5MR	17		FEMALE	2716	LUSC	Alive	T2	N0	M0	Stage IB	0	2716		TUMOR FREE	70	L-Upper	NO	R0	120
TCGA-63-A5MS	20		MALE	2381	LUSC	Alive	T2	N0	M0	Stage IB	0	2381		TUMOR FREE	78	L-Upper	NO	R0	6
TCGA-63-A5MT	15		MALE	498	LUSC	Alive	T3	N0	M0	Stage IIB	1	427	Distant Metastasis	WITH TUMOR	74	R-Upper	NO	R0	100
TCGA-63-A5MU	32		MALE		LUSC		T2b	N1	M0	Stage IIB	1	420	Distant Metastasis	WITH TUMOR	48	R-Lower	NO	R0	15
TCGA-63-A5MV	120		MALE	1100	LUSC	Alive	T2b	N0	M0	Stage IIA	0	1100		TUMOR FREE	69	R-Lower	NO	R0	50
TCGA-63-A5MW	121		MALE	1639	LUSC	Alive	T2	N0	M0	Stage IB	0	1639		TUMOR FREE	76	R-Upper	Unknown	R0	60
TCGA-63-A5MY	19		MALE	1052	LUSC	Alive	T1b	N0	M0	Stage IA	0	1052		TUMOR FREE	63	L-Lower	Unknown	R0	40
TCGA-66-2727	16		FEMALE	516	LUSC	Dead	T2	N0	M0	Stage IB	0	516		Not Available	55	L-Lower	Not Available	R0	56
TCGA-66-2734	38		FEMALE	1311	LUSC	Alive	T2	N0	M0	Stage IB	0	1311		Not Available	62	L-Lower	Not Available	R0	40
TCGA-66-2737	59		MALE	61	LUSC	Alive	T2	N1	M0	Stage IIB	0	61		TUMOR FREE	72	R-Middle	Not Available	R0	40
TCGA-66-2742	37		MALE	641	LUSC	Alive	T2	N1	M1	Stage IV	0	641		Not Available	70	R-Upper	Not Available	R0	44
TCGA-66-2744	59		MALE	30	LUSC	Alive	T2	N1	M0	Stage IIB	0	30		TUMOR FREE	71	R-Lower	Not Available	R0	63
TCGA-66-2753	36		MALE	31	LUSC	Alive	T2	N0	M0	Stage IB	0	31		TUMOR FREE	69	L-Lower	Not Available	R0	162
TCGA-66-2754	5		MALE	61	LUSC	Alive	T2	N2	M0	Stage IIIA	0	61		TUMOR FREE	67	R-Upper	Not Available	R0	40
TCGA-66-2755	130		MALE	28	LUSC	Alive	T2	N0	M0	Stage IB	0	28		TUMOR FREE	63	R-Upper	Not Available	R0	20
TCGA-66-2756	26		MALE	30	LUSC	Alive	T4	N0	M0	Stage IIIB	0	30		TUMOR FREE	68	L-Upper	Not Available	R0	Not Available
TCGA-66-2757	75		FEMALE	1338	LUSC	Dead	T1	N0	M0	Stage IA	1	912		Not Available	65	L-Upper	Not Available	R0	72
TCGA-66-2758	73		MALE	639	LUSC	Alive	T2	N0	M0	Stage IB	0	639		Not Available	71	L-Upper	Not Available	R0	56
TCGA-66-2759	33		MALE	762	LUSC	Alive	T2	N2	M0	Stage IIIA	0	762		Not Available	66	L-Lower	Not Available	R0	16
TCGA-66-2763	95		FEMALE	30	LUSC	Alive	T2	N0	M0	Stage IB	0	30		TUMOR FREE	63	L-Upper	Not Available	R0	40
TCGA-66-2765	42		MALE	61	LUSC	Alive	T2	N0	M0	Stage IB	0	61		TUMOR FREE	64	L-Lower	Not Available	R0	108
TCGA-66-2766	51		MALE	31	LUSC	Alive	T2	N2	M0	Stage IIIA	0	31		TUMOR FREE	54	L-Upper	Not Available	R0	80
TCGA-66-2767	197		MALE	61	LUSC	Alive	T2	N3	M0	Stage IIIB	0	61		TUMOR FREE	62	R-Lower	Not Available	R0	43
TCGA-66-2768	19		MALE	61	LUSC	Alive	T2	N1	M0	Stage IIB	0	61		TUMOR FREE	57	L-Lower	Not Available	R0	Not Available
TCGA-66-2769	92		MALE	215	LUSC	Dead	T4	N0	M0	Stage IIIB	0	215		Not Available	75	L-Upper	Not Available	R1	33
TCGA-66-2770	82		MALE	700	LUSC	Alive	T2	N0	M0	Stage IB	0	700		Not Available	79	R-Lower	Not Available	R0	25
TCGA-66-2771	39		MALE	578	LUSC	Alive	T2	N1	M0	Stage IIB	0	578		Not Available	60	R-Upper	Not Available	R0	70
TCGA-66-2773	52		MALE	92	LUSC	Dead	T2	N0	M0	Stage IB	0	92		TUMOR FREE	69	L-Lower	Not Available	R0	58
TCGA-66-2777	31		MALE	61	LUSC	Alive	T2	N0	M0	Stage IB	0	61		TUMOR FREE	71	R-Middle	Not Available	R0	12
TCGA-66-2778	18		FEMALE	578	LUSC	Alive	T2	N3	M0	Stage IIIB	0	578		Not Available	68	L-Lower	Not Available	R2	37
TCGA-66-2780	32		MALE	366	LUSC	Dead	T2	N0	M0	Stage IB	0	366		Not Available	65	L-Upper	Not Available	R0	28
TCGA-66-2781	96		MALE	121	LUSC	Alive	T2	N0	M0	Stage IB	0	121		TUMOR FREE	67	L-Upper	Not Available	R0	80
TCGA-66-2782	74		MALE	365	LUSC	Dead	T3	N0	M0	Stage IIB	1	304		Not Available	71	R-Upper	Not Available	R0	50
TCGA-66-2783	17		MALE	759	LUSC	Alive	T2	N3	M0	Stage IIIB	0	759		Not Available	67	L-Lower	Not Available	R2	65
TCGA-66-2785	96		MALE	60	LUSC	Alive	T2	N0	M0	Stage IB	0	60		TUMOR FREE	65	L-Upper	Not Available	R0	70
TCGA-66-2786	67		FEMALE	790	LUSC	Alive	T1	N0	M0	Stage IA	0	790		Not Available	68	R-Upper	Not Available	R0	74
TCGA-66-2787	28		MALE	1217	LUSC	Alive	T1	N0	M0	Stage IA	0	1217		Not Available	57	Discrepancy	Not Available	R0	40
TCGA-66-2788	37		MALE	699	LUSC	Alive	T2	N0	M0	Stage IB	0	699		Not Available	56	L-Lower	Not Available	R0	80
TCGA-66-2789	102		MALE	123	LUSC	Dead	T1	N3	M0	Stage IIIB	0	123		TUMOR FREE	73	L-Lower	Not Available	R0	40
TCGA-66-2790	186		MALE	699	LUSC	Alive	T2	N1	M0	Stage IIB	1	699		Not Available	72	L-Upper	Not Available	R0	57
TCGA-66-2791	85		MALE	153	LUSC	Dead	T2	N3	M0	Stage IIIB	0	153		Not Available	66	R-Lower	Not Available	R1	25
TCGA-66-2792	91		MALE	913	LUSC	Alive	T2	N1	M0	Stage IIB	0	913		Not Available	58	L-Lower	Not Available	R0	10
TCGA-66-2793	39		MALE	306	LUSC	Dead	T4	N1	M0	Stage IIIB	0	306		TUMOR FREE	68	R-Middle	Not Available	R0	112
TCGA-66-2794	63		MALE	1645	LUSC	Alive	T4	N2	M0	Stage IIIB	0	1645		Not Available	64	L-Upper	Not Available	R0	100
TCGA-66-2795	34		MALE	122	LUSC	Alive	T4	N1	M0	Stage IIIB	0	122		TUMOR FREE	68	L-Upper	Not Available	R0	86
TCGA-66-2800	40		MALE	1492	LUSC	Alive	T4	N0	M0	Stage IIIB	0	1492		Not Available	70	R-Upper	Not Available	R0	75
TCGA-68-7755	29		FEMALE	83	LUSC	Alive	T1b	N1	M0	Stage IIA	0	83		TUMOR FREE	60	R-Lower	NO	Not Available	78
TCGA-68-7756	20		MALE	202	LUSC	Alive	T4	N1	MX	Stage IIIA	0	202		Not Available	84	L-Upper	YES	Not Available	20
TCGA-68-7757	60		MALE	211	LUSC	Alive	T1b	N0	MX	Stage IA	0	211		Unknown	74	L-Upper	NO	Not Available	25
TCGA-68-8250	36		MALE	244	LUSC	Alive	T1a	N0	MX	Stage IA	0	244		TUMOR FREE	66	R-Upper	NO	Not Available	50
TCGA-68-8251	117		MALE	406	LUSC	Alive	T2a	N0	M0	Stage IB	0	406		WITH TUMOR	78	L-Upper	Not Available	Not Available	52
TCGA-68-A59I	62		FEMALE	492	LUSC	Alive	T3	N1	M0	Stage IIIA	1	159	New Primary Tumor	TUMOR FREE	73	L-Lower	Unknown	Not Evaluated	50
TCGA-68-A59J	69		FEMALE	448	LUSC	Alive	T2a	N0	MX	Stage IB	0	448		TUMOR FREE	74	R-Lower	Unknown	R0	45
TCGA-6A-AB49	5		FEMALE		LUSC		T2	N0	MX	Stage IB	0			Unknown	73	L-Lower	Not Available	RX	50
TCGA-70-6722	38		MALE	367	LUSC	Alive	T3	N1	M0	Stage IIIA	1	293	Locoregional Recurrence	TUMOR FREE	47	R-Upper	Not Available	RX	Not Available
TCGA-70-6723	89		MALE	375	LUSC	Alive	T3	N0	M0	Stage IIA	1	312	Locoregional Recurrence	TUMOR FREE	65	R-Upper	Not Available	RX	Not Available
TCGA-77-6842	112		MALE	899	LUSC	Dead	T2	N1	M0	Stage IIB	1	201		Not Available	79	Not Available	NO	R0	22.5
TCGA-77-6843	42		MALE	2224	LUSC	Dead	T1	N1	M0	Stage IIA	0	2224		Not Available	74	R-Upper	NO	R0	30
TCGA-77-6844	68		MALE	2284	LUSC	Dead	T3	N1	M0	Stage IIIA	1	1788		Not Available	74	R-Lower	NO	R0	45
TCGA-77-6845	45		MALE	708	LUSC	Dead	T3	N0	M0	Stage IIB	0	708		Not Available	69	R-Middle	NO	R0	51
TCGA-77-7138	18	88	MALE	340	LUSC	Dead	T2	N0	M0	Stage IB	0	340		Not Available	67	L-Lower	NO	R0	20
TCGA-77-7139	25		MALE	4261	LUSC	Alive	T2	N1	M0	Stage IIB	0	4261		Not Available	56	R-Lower	NO	R0	2
TCGA-77-7140	20		FEMALE	632	LUSC	Dead	T2	N1	M0	Stage IIB	1	250		Not Available	69	L-Upper	NO	R0	Not Available
TCGA-77-7141	41		MALE	15	LUSC	Alive	T2	N0	M0	Stage IB	0	15		Not Available	64	L-Upper	NO	R0	70
TCGA-77-7142	16	53	FEMALE	2227	LUSC	Alive	T2	N0	M0	Stage IB	0	2227		TUMOR FREE	59	L-Upper	NO	R0	52.5
TCGA-77-7335	27	61	FEMALE	2133	LUSC	Dead	T4	N2	M0	Stage IIIB	0	2133		Not Available	62	Not Available	NO	R0	52
TCGA-77-7337	48	100	MALE	3253	LUSC	Dead	T2	N1	M0	Stage IIB	0	3253		Not Available	65	L-Upper	NO	R0	79.5
TCGA-77-7338	60	70	MALE	5	LUSC	Dead	T2	N0	M0	Stage IB	0	5		Not Available	64	R-Upper	NO	R1	41.25
TCGA-77-7463	19		MALE	1423	LUSC	Dead	T2	N0	M0	Stage IB	0	1423		Not Available	75	L-Upper	NO	R0	42
TCGA-77-7465	63		MALE	990	LUSC	Alive	T2a	N1	M0	Stage IIA	0	990		Not Available	58	R-Upper	NO	R0	120
TCGA-77-8007	40	84	MALE	198	LUSC	Dead	T2	N1	M0	Stage IIB	1	139		Not Available	68	R-Upper	NO	R0	100
TCGA-77-8008	41	76	MALE	2639	LUSC	Dead	T2	N0	M0	Stage IB	0	2639		Not Available	68	R-Lower	NO	R0	61.5
TCGA-77-8009	11		MALE	1695	LUSC	Dead	T2	N1	M0	Stage IIB	1	607	New Primary Tumor	Not Available	68	R-Lower	NO	R0	97.5
TCGA-77-8128	29		MALE	1150	LUSC	Dead	T2	N2	M0	Stage IIIA	0	1150		Unknown	60	Other (please specify)	NO	R0	113
TCGA-77-8130	24		MALE	4765	LUSC	Alive	T2	N1	M0	Stage IIB	1	4471	New Primary Tumor	TUMOR FREE	69	L-Upper	NO	R0	32.25
TCGA-77-8131	63		MALE	383	LUSC	Dead	T2	NX	M0	Stage IB	0	383		Unknown	72	L-Lower	NO	R0	69
TCGA-77-8133	154		MALE	1640	LUSC	Dead	T1	N1	M0	Stage IIA	0	1640		Unknown	74	Other (please specify)	NO	R0	22
TCGA-77-8136	40		FEMALE	1189	LUSC	Dead	T2	N1	M0	Stage IIB	1	301	Distant Metastasis	Unknown	74	Other (please specify)	NO	R0	135
TCGA-77-8138	34		MALE	539	LUSC	Dead	T2	N0	M0	Stage IB	1	289	Locoregional Recurrence	WITH TUMOR	74	L-Upper	NO	R0	54
TCGA-77-8139	41		MALE	3166	LUSC	Alive	T3	N0	M0	Stage IIB	0	3166		TUMOR FREE	72	R-Upper	NO	R0	52
TCGA-77-8140	10		FEMALE	351	LUSC	Dead	T2	N1	M0	Stage IIB	0	351		Unknown	66	R-Lower	NO	R0	78
TCGA-77-8143	13		MALE	803	LUSC	Dead	T2	N2	M0	Stage IIIA	1			WITH TUMOR	76	L-Upper	NO	R0	30
TCGA-77-8144	15		MALE	833	LUSC	Alive	T2	N0	M0	Stage IB	0	833		Unknown	70	L-Lower	NO	R0	59
TCGA-77-8145	2		MALE	212	LUSC	Dead	T4	N1	M0	Stage IIIB	1	136	Distant Metastasis	Unknown	73	Other (please specify)	NO	R1	57
TCGA-77-8146	11		MALE	3189	LUSC	Alive	T1	N0	M0	Stage IA	0	3189		Unknown	72	R-Upper	NO	R0	75
TCGA-77-8148	15		MALE	2023	LUSC	Alive	T3	N1	M0	Stage IIIA	0	2023		Unknown	68	Other (please specify)	NO	R0	60
TCGA-77-8150	17		MALE	1655	LUSC	Dead	T3	N1	M0	Stage IIIA	1	1278	Locoregional Recurrence	WITH TUMOR	64	R-Lower	NO	R0	46
TCGA-77-8153	7		FEMALE	1992	LUSC	Alive	T2	N0	M0	Stage IB	0	1992		TUMOR FREE	77	R-Lower	NO	R0	25
TCGA-77-8154	5		MALE	1841	LUSC	Alive	T1	N0	M0	Stage IA	0	1841		TUMOR FREE	67	R-Lower	NO	R0	40
TCGA-77-8156	63		MALE	1106	LUSC	Alive	T2a	N0	M0	Stage IB	0	1106		Unknown	60	L-Upper	NO	R0	57.5
TCGA-77-A5FZ	119		MALE	3838	LUSC	Dead	T4	N0	M0	Stage IIIB	0	3838		Unknown	64	L-Upper	NO	R0	141
TCGA-77-A5G1	22		MALE	4026	LUSC	Alive	T3	N1	M0	Stage IIIA	1	2197	New Primary Tumor	Unknown	75	R-Lower	NO	R0	53
TCGA-77-A5G3	34		MALE	4570	LUSC	Alive	T2	N1	M0	Stage IIB	0	4570		TUMOR FREE	63	Bronchial	NO	R0	40
TCGA-77-A5G6	20		MALE	678	LUSC	Dead	T2	N2	M0	Stage IIIA	1	392	Locoregional Recurrence	WITH TUMOR	66	R-Upper	NO	R0	74
TCGA-77-A5G7	16		MALE	180	LUSC	Dead	T1	N0	M0	Stage IA	0	180		Unknown	63	L-Upper	NO	R0	69
TCGA-77-A5G8	23		MALE	1884	LUSC	Alive	T3	N0	M0	Stage IIB	0	1884		Unknown	70	R-Upper	NO	R0	90
TCGA-77-A5GA	20		MALE	1280	LUSC	Alive	T2a	N0	M0	Stage IB	0	1280		Unknown	76	L-Upper	NO	R0	99
TCGA-77-A5GB	4		MALE	0	LUSC	Dead	T2a	NX	M0	Stage IB	1		New Primary Tumor	Unknown	90	Other (please specify)	NO	R0	52
TCGA-77-A5GF	14		MALE	840	LUSC	Dead	T2a	N1	M0	Stage IIA	1	722	Locoregional Recurrence	WITH TUMOR	70	L-Lower	NO	R0	60
TCGA-77-A5GH	47		MALE	1182	LUSC	Alive	T2a	N0	M0	Stage IB	0	1182		Unknown	81	Other (please specify)	NO	R0	11
TCGA-79-5596	54		MALE		LUSC		T3	N1	M0	Stage IIIA	1			TUMOR FREE	Not Available	L-Upper	Not Available	R0	40
TCGA-85-6175	60		FEMALE	294	LUSC	Dead	T3	N0	M0	Stage IIB	1			TUMOR FREE	63	L-Upper	NO	R0	Not Available
TCGA-85-6560	76		MALE	1259	LUSC	Alive	T1b	N1	M0	Stage IIA	0	1259		WITH TUMOR	59	R-Upper	Not Available	R0	40
TCGA-85-6561	104		MALE	1224	LUSC	Alive	T2a	NX	M0	Stage IB	0	1224		TUMOR FREE	66	R-Upper	Not Available	R0	35
TCGA-85-6798	19		MALE	195	LUSC	Dead	T3	N1	M0	Stage IIIA	1	180	Distant Metastasis	TUMOR FREE	57	R-Upper	Not Available	R0	35
TCGA-85-7696	87		MALE	1111	LUSC	Alive	T1	N0	M0	Stage IA	0	1111		TUMOR FREE	64	L-Upper	Not Available	R0	30
TCGA-85-7697	70		MALE	1063	LUSC	Alive	T3	N0	M0	Stage IIB	0	1063		TUMOR FREE	49	L-Upper	Not Available	R0	30
TCGA-85-7698	70		MALE	952	LUSC	Alive	T1b	N0	M0	Stage IA	1	650	Distant Metastasis	TUMOR FREE	48	R-Upper	Not Available	R0	44
TCGA-85-7699	140		MALE	1001	LUSC	Dead	T4	N0	M0	Stage IIIA	1	760	Distant Metastasis	TUMOR FREE	73	L-Upper	Not Available	R0	74
TCGA-85-7710	42	463	FEMALE	42	LUSC	Alive	T1b	N0	M0	Stage IA	0	42		TUMOR FREE	59	L-Lower	Not Available	Not Available	45
TCGA-85-7843	31		MALE	35	LUSC	Alive	T2a	N1	M0	Stage IIA	0	35		Not Available	50	L-Upper	Not Available	R0	35
TCGA-85-7844	71		MALE	911	LUSC	Alive	T2a	N0	M0	Stage IB	0	911		TUMOR FREE	71	L-Upper	NO	R0	40
TCGA-85-7950	64		MALE	576	LUSC	Alive	T2a	N0	M0	Stage IB	0	576		WITH TUMOR	46	L-Upper	NO	RX	27
TCGA-85-8048	82		MALE	765	LUSC	Alive	T1	N0	M0	Stage IA	0	765		TUMOR FREE	62	L-Lower	Not Available	R0	50
TCGA-85-8049	115		MALE	579	LUSC	Alive	T2a	N0	M0	Stage IB	0	579		TUMOR FREE	57	L-Lower	NO	R0	Not Available
TCGA-85-8052	47		MALE	734	LUSC	Alive	T3	N0	M0	Stage IIB	0	734		TUMOR FREE	53	R-Upper	NO	R0	40
TCGA-85-8070	45		MALE	960	LUSC	Alive	T2	N0	M0	Stage IB	0	960		WITH TUMOR	71	L-Upper	NO	R0	50
TCGA-85-8071	13		MALE	815	LUSC	Alive	T1a	N1	M0	Stage IIA	0	815		TUMOR FREE	52	R-Upper	NO	R0	30
TCGA-85-8072	38		MALE	932	LUSC	Alive	T1a	N0	M0	Stage IA	0	932		TUMOR FREE	60	L-Upper	NO	R0	15
TCGA-85-8276	49		MALE	1050	LUSC	Alive	T1b	N1	M0	Stage IIA	1	1048	Distant Metastasis	TUMOR FREE	62	L-Upper	Not Available	R0	20
TCGA-85-8277	40		MALE	307	LUSC	Dead	T3	N1	M0	Stage IIIA	0	307		TUMOR FREE	70	L-Upper	Not Available	R0	Not Available
TCGA-85-8287	74		MALE	23	LUSC	Dead	T1b	N0	M0	Stage IA	0	23		TUMOR FREE	72	L-Upper	Not Available	R0	50
TCGA-85-8288	159		MALE	402	LUSC	Dead	T1b	N1	M0	Stage IIA	0	402		TUMOR FREE	70	R-Middle	Not Available	R0	50
TCGA-85-8350	98		MALE	683	LUSC	Alive	T1b	N0	M0	Stage IA	0	683		TUMOR FREE	61	R-Upper	NO	R0	40
TCGA-85-8351	11		MALE	510	LUSC	Alive	T2a	N1	M0	Stage IIA	0	510		TUMOR FREE	72	R-Lower	NO	R0	60
TCGA-85-8352	27		MALE	161	LUSC	Dead	T3	N1	M0	Stage IIIA	1	128	Distant Metastasis	TUMOR FREE	67	R-Upper	Not Available	R0	50
TCGA-85-8353	67		MALE	94	LUSC	Dead	T3	N1	M0	Stage IIIA	1			WITH TUMOR	72	R-Lower	NO	R0	50
TCGA-85-8354	13		MALE	995	LUSC	Alive	T2a	N0	M0	Stage IB	0	995		TUMOR FREE	53	R-Lower	Not Available	R0	30
TCGA-85-8355	205		MALE	61	LUSC	Alive	T1a	N0	M0	Stage IA	0	61		TUMOR FREE	63	L-Upper	Unknown	R0	Not Available
TCGA-85-8479	20		MALE	468	LUSC	Alive	T1a	N0	M0	Stage IA	0	468		TUMOR FREE	66	L-Lower	NO	R0	90
TCGA-85-8481	10		MALE	236	LUSC	Dead	T3	N0	M0	Stage IIB	0	236		TUMOR FREE	70	L-Upper	NO	R0	80
TCGA-85-8580	39		FEMALE	1113	LUSC	Alive	T2a	N0	M0	Stage IB	0	1113		TUMOR FREE	52	R-Lower	NO	R0	38
TCGA-85-8582	52		MALE	1160	LUSC	Alive	T1a	N0	M0	Stage IA	0	1160		TUMOR FREE	49	L-Upper	NO	R0	40
TCGA-85-8584	44		MALE	383	LUSC	Dead	T2a	N1	M0	Stage IIA	0	383		TUMOR FREE	71	R-Upper	NO	R0	50
TCGA-85-8664	31		MALE	550	LUSC	Dead	T2b	N1	M0	Stage IIB	1	434	Locoregional Recurrence	TUMOR FREE	73	R-Upper	Not Available	R0	60
TCGA-85-8666	21		MALE	687	LUSC	Dead	T2a	N0	M0	Stage IB	0	687		TUMOR FREE	65	L-Upper	Not Available	R0	55
TCGA-85-A4CL	52		MALE	921	LUSC	Dead	T1b	N0	M0	Stage IA	0	921		TUMOR FREE	65	R-Lower	NO	R0	40
TCGA-85-A4CN	20		FEMALE	1038	LUSC	Alive	T2b	N1	M0	Stage IIB	0	1038		TUMOR FREE	56	L-Lower	NO	R0	Not Available
TCGA-85-A4JB	24		MALE	942	LUSC	Alive	T3	N0	M0	Stage IIB	0	942		TUMOR FREE	74	R-Upper	NO	R0	25
TCGA-85-A4JC	23		MALE	604	LUSC	Dead	T2b	N0	M0	Stage IIA	1	548	Locoregional Recurrence	TUMOR FREE	84	L-Upper	NO	R0	25
TCGA-85-A4PA	581		MALE	741	LUSC	Alive	T2a	N0	M0	Stage IB	0	741		TUMOR FREE	61	L-Lower	NO	R0	40
TCGA-85-A4QQ	9		MALE	927	LUSC	Dead	T2a	N0	M0	Stage IB	0	927		TUMOR FREE	68	R-Lower	NO	R0	50
TCGA-85-A4QR	12		MALE	600	LUSC	Alive	T2a	N0	M0	Stage IB	0	600		TUMOR FREE	67	R-Upper	NO	R0	50
TCGA-85-A50M	11		MALE	826	LUSC	Dead	T2b	N0	M0	Stage IIA	0	826		TUMOR FREE	47	R-Upper	NO	R0	15
TCGA-85-A50Z	20		MALE	493	LUSC	Alive	T2b	N0	M0	Stage IIA	1	462	New Primary Tumor	TUMOR FREE	57	R-Upper	Not Available	R0	45
TCGA-85-A510	38		FEMALE	482	LUSC	Alive	T2b	N1	M0	Stage IIB	1	363	Distant Metastasis	TUMOR FREE	74	L-Lower	NO	R0	45
TCGA-85-A511	41		MALE	455	LUSC	Dead	T2b	N1	M0	Stage IIB	1	390	Distant Metastasis	TUMOR FREE	62	L-Lower	NO	R0	40
TCGA-85-A512	31		MALE	465	LUSC	Alive	T1b	N1	M0	Stage IIA	0	465		TUMOR FREE	46	L-Upper	NO	R0	25
TCGA-85-A513	110		FEMALE	910	LUSC	Alive	T1a	NX	M0	Stage IA	0	910		TUMOR FREE	60	L-Upper	NO	R0	Not Available
TCGA-85-A53L	29		MALE	377	LUSC	Alive	T2b	N0	M0	Stage IIA	0	377		TUMOR FREE	63	R-Middle	NO	R0	30
TCGA-85-A5B5	19		MALE	111	LUSC	Alive	T1b	N0	M0	Stage IA	0	111		TUMOR FREE	58	R-Upper	NO	R0	15
TCGA-90-6837	34	89	MALE	758	LUSC	Alive	T3	N0	MX	Stage IIB	0	758		TUMOR FREE	64	R-Upper	Not Available	R0	40
TCGA-90-7766	72		FEMALE	289	LUSC	Alive	T1b	N0	MX	Stage IA	1	289	Locoregional Recurrence	TUMOR FREE	66	R-Upper	NO	R0	30
TCGA-90-7767	494	87	MALE	89	LUSC	Alive	T2b	N1	MX	Stage IIB	0	89		TUMOR FREE	56	R-Upper	NO	R0	25
TCGA-90-7769	7		MALE	358	LUSC	Alive	T2b	N1	MX	Stage IIB	0	358		TUMOR FREE	55	Not Available	NO	R0	36
TCGA-90-7964	22		MALE	428	LUSC	Alive	T2a	N0	MX	Stage IB	0	428		TUMOR FREE	70	R-Upper	NO	R0	180
TCGA-90-A4ED	43		MALE	615	LUSC	Alive	T2a	N0	MX	Stage IB	0	615		TUMOR FREE	69	R-Upper	NO	Not Evaluated	30
TCGA-90-A4EE	175		MALE	688	LUSC	Alive	T2a	N1	MX	Stage IIA	0	688		TUMOR FREE	53	Bronchial	YES	Not Evaluated	68
TCGA-90-A59Q	41		FEMALE	322	LUSC	Dead	T2a	N1	MX	Stage IIA	1	274	Distant Metastasis	TUMOR FREE	61	R-Upper	NO	R0	80
TCGA-92-7340	41	120	FEMALE	82	LUSC	Alive	T2a	N1	MX	Stage IIA	1			WITH TUMOR	45	R-Upper	NO	R1	15
TCGA-92-7341	22		MALE	106	LUSC	Alive	T2a	N0	MX	Stage IB	1			WITH TUMOR	71	R-Upper	NO	R0	50
TCGA-92-8063	15		MALE	122	LUSC	Alive	T2b	N2	MX	Stage IIIA	0	122		TUMOR FREE	52	L-Upper	NO	RX	74
TCGA-92-8064	59		MALE	160	LUSC	Alive	T2b	N0	MX		0	160		TUMOR FREE	58	R-Upper	NO	RX	30
TCGA-92-8065	20		FEMALE	70	LUSC	Alive	T3	N0	MX	Stage IIB	0	70		TUMOR FREE	74	L-Lower	NO	RX	14
TCGA-94-7033	13		MALE	640	LUSC	Alive	T2	N0	MX	Stage IB	0	640		Not Available	73	Discrepancy	Not Available	R0	30
TCGA-94-7557	27		MALE	5	LUSC	Dead	T2	N0	M0	Stage IB	0	5		Not Available	73	L-Upper	Not Available	Not Available	Not Available
TCGA-94-7943	62		MALE	559	LUSC	Alive	T1b	NX	MX	Stage IA	1	556	Locoregional Recurrence	Not Available	80	L-Lower	Not Available	R0	30
TCGA-94-8035	16		MALE	122	LUSC	Alive	T3	N0	MX	Stage IIB	0	122		TUMOR FREE	64	L-Upper	Not Available	R0	50
TCGA-94-8490	33		MALE	153	LUSC	Alive	T3	N0	M0	Stage IIB	0	153		TUMOR FREE	70	R-Upper	NO	R0	Not Available
TCGA-94-8491	39		MALE	810	LUSC	Alive	T2a	N1	M0	Stage IIA	1	641	Distant Metastasis	TUMOR FREE	73	R-Lower	NO	Not Available	56
TCGA-94-A4VJ	35		FEMALE	430	LUSC	Alive	T1b	N0	M0	Stage IA	0	430		TUMOR FREE	71	Bronchial	NO	Not Available	37.5
TCGA-94-A5I4	30		MALE	491	LUSC	Alive	T2a	N1	MX	Stage IIA	1	314	Distant Metastasis	TUMOR FREE	61	Bronchial	NO	RX	80
TCGA-94-A5I6	30		MALE	538	LUSC	Alive	T3	N0	M0	Stage IIB	1	481	Distant Metastasis	TUMOR FREE	62	L-Lower	NO	RX	80
TCGA-96-7544	34		MALE	2160	LUSC	Dead	T2	N1	MX	Stage IIB	0	2160		TUMOR FREE	83	L-Lower	Not Available	Not Available	65
TCGA-96-7545	43		MALE	1736	LUSC	Dead	T1	N0	MX	Stage IA	1	1693	Locoregional Recurrence	Not Available	73	R-Lower	Not Available	Not Available	116
TCGA-96-8169	30		FEMALE	557	LUSC	Alive	T1a	N0	M0	Stage IA	0	557		TUMOR FREE	67	R-Lower	NO	Not Available	35
TCGA-96-8170	39		FEMALE	531	LUSC	Alive	T1a	N1	M0	Stage IIA	0	531		TUMOR FREE	75	R-Lower	NO	Not Available	50
TCGA-96-A4JK	47		MALE	589	LUSC	Alive	T2a	N1	M0	Stage IIA	0	589		TUMOR FREE	65	R-Upper	NO	R0	110
TCGA-96-A4JL	216		FEMALE	842	LUSC	Alive	T2a	N1	M0	Stage IIA	0	842		TUMOR FREE	78	L-Lower	NO	R0	Not Available
TCGA-98-7454	65		MALE	652	LUSC	Alive	T2a	N0	M0	Stage IB	0	652		TUMOR FREE	73	R-Upper	YES	R0	60
TCGA-98-8020	9		FEMALE	84	LUSC	Dead	T2	N2	M0	Stage IIIA	1	11	Distant Metastasis	WITH TUMOR	56	R-Upper	YES	R0	Not Available
TCGA-98-8021	61		FEMALE	937	LUSC	Alive	T1a	N0	M0	Stage IA	1	918	Locoregional Recurrence	TUMOR FREE	75	R-Upper	YES	R0	60
TCGA-98-8022	34		MALE	933	LUSC	Dead	T1a	N0	M0	Stage IA	0	933		TUMOR FREE	61	R-Upper	YES	R0	117
TCGA-98-8023	48		MALE	649	LUSC	Alive	T3	N1	M0	Stage IIIA	0	649		TUMOR FREE	70	Other (please specify)	YES	R0	75
TCGA-98-A538	29		MALE	826	LUSC	Alive	T3	N0	M0	Stage IIB	0	826		TUMOR FREE	67	L-Upper	YES	R0	35
TCGA-98-A539	26		MALE	173	LUSC	Alive	T3	N0	M0	Stage IIB	1	173	Locoregional Recurrence	Unknown	63	L-Upper	YES	R0	75
TCGA-98-A53A	46		MALE	552	LUSC	Dead	T2a	N0	M0	Stage IB	0	552		Unknown	70	R-Middle	YES	R0	80
TCGA-98-A53B	49		MALE	61	LUSC	Dead	T2a	N0	M0	Stage IB	0	61		TUMOR FREE	69	L-Upper	NO	R0	40
TCGA-98-A53C	109		FEMALE	822	LUSC	Alive	T1a	N0	M0	Stage IA	0	822		TUMOR FREE	77	R-Lower	NO	R0	112.5
TCGA-98-A53D	68		MALE	645	LUSC	Dead	T3	N0	M0	Stage IIB	1	413	Locoregional Recurrence	TUMOR FREE	68	R-Upper	NO	R0	90
TCGA-98-A53H	96		FEMALE	618	LUSC	Alive	T1a	N0	M0	Stage IA	1	427	New Primary Tumor	Unknown	76	R-Upper	NO	R0	40
TCGA-98-A53I	150		MALE	565	LUSC	Alive	T2a	N1	M0	Stage IIA	0	565		Unknown	64	R-Upper	YES	R0	70
TCGA-98-A53J	20		MALE	630	LUSC	Alive	T2a	N0	M0	Stage IB	0	630		TUMOR FREE	77	R-Upper	YES	R0	100
TCGA-J1-A4AH	6		MALE	581	LUSC	Alive	T2b	N0	MX	Stage IIA	0	581		TUMOR FREE	70	L-Lower	NO	R0	100
TCGA-L3-A4E7	34		MALE	392	LUSC	Alive	T2a	N0	M0	Stage IB	0	392		TUMOR FREE	71	R-Lower	NO	R0	25
TCGA-L3-A524	11		FEMALE	490	LUSC	Dead	T3	N0	M0	Stage IIB	0	490		TUMOR FREE	45	R-Upper	NO	R0	25.6
TCGA-LA-A446	54		MALE	401	LUSC	Alive	T1b	N0	MX	Stage IA	0	401		TUMOR FREE	68	R-Lower	NO	R0	26
TCGA-LA-A7SW	34		MALE	408	LUSC	Dead	T3	N1	MX	Stage IIIA	1	235	Locoregional Recurrence	Unknown	71	L-Upper	NO	R0	37
TCGA-MF-A522	8		MALE	360	LUSC	Dead	T2a	N0	MX	Stage IB	1	173	Distant Metastasis	Unknown	54	R-Upper	Not Available	Not Available	45
TCGA-NC-A5HD	19		MALE	2	LUSC	Dead	T3	N0	M0	Stage IIB	0	2		TUMOR FREE	79	L-Upper	NO	R0	50
TCGA-NC-A5HE	140		MALE	2336	LUSC	Alive	T2	N1	M0	Stage IIB	0	2336		TUMOR FREE	60	L-Upper	NO	R0	30
TCGA-NC-A5HF	21		MALE	138	LUSC	Dead	T4	N0	MX	Stage IIIB	1	132	Distant Metastasis	WITH TUMOR	74	L-Lower	NO	R0	Not Available
TCGA-NC-A5HG	55		MALE	1963	LUSC	Alive	T2	N2	M0	Stage IIIA	0	1963		TUMOR FREE	59	R-Lower	NO	R0	80
TCGA-NC-A5HH	36		MALE	37	LUSC	Alive	T1	N0	M0	Stage IA	0	37		TUMOR FREE	53	L-Lower	NO	R0	60
TCGA-NC-A5HI	36		FEMALE	1743	LUSC	Alive	T2	N0	M0	Stage IB	1	70	New Primary Tumor	TUMOR FREE	68	R-Lower	NO	R0	60
TCGA-NC-A5HJ	57		MALE	418	LUSC	Dead	T3	N0	M0	Stage IIB	1	328	New Primary Tumor	WITH TUMOR	59	R-Middle	NO	R0	78
TCGA-NC-A5HK	30		FEMALE	128	LUSC	Alive	T3	N0	M0	Stage IIB	0	128		TUMOR FREE	58	Other (please specify)	NO	R0	40
TCGA-NC-A5HL	45		MALE	88	LUSC	Dead	T2b	N0	M0	Stage IIA	0	88		TUMOR FREE	73	R-Upper	NO	R0	40
TCGA-NC-A5HM	22		MALE	1212	LUSC	Alive	T2a	N0	M0	Stage IB	0	1212		TUMOR FREE	76	R-Lower	NO	R0	50
TCGA-NC-A5HN	46		MALE	1499	LUSC	Alive	T2a	N1	M0	Stage IIA	0	1499		TUMOR FREE	77	L-Lower	NO	R0	100
TCGA-NC-A5HO	18		FEMALE	1336	LUSC	Alive	T3	N1	M0	Stage IIIA	0	1336		TUMOR FREE	70	L-Upper	NO	Not Evaluated	30
TCGA-NC-A5HP	24		MALE	770	LUSC	Dead	T2a	N0	M1b	Stage IV	1	317	Distant Metastasis	WITH TUMOR	69	L-Upper	NO	R0	50
TCGA-NC-A5HQ	69		MALE	448	LUSC	Dead	T3	N2	M0	Stage IIIA	0	448		Unknown	70	R-Middle	NO	R0	Not Available
TCGA-NC-A5HR	46		FEMALE	1244	LUSC	Alive	T2a	N1	M0	Stage IIA	0	1244		TUMOR FREE	75	R-Lower	NO	R0	35
TCGA-NC-A5HT	35		MALE	804	LUSC	Alive	T3	N1	M0	Stage IIIA	1	203	Locoregional Recurrence	WITH TUMOR	69	Other (please specify)	NO	R0	50
TCGA-NK-A5CR	6		MALE	2542	LUSC	Alive	T2	N0	MX	Stage IB	0	2542		TUMOR FREE	77	R-Upper	NO	Not Evaluated	40
TCGA-NK-A5CT	17		MALE	1997	LUSC	Alive	T1	N0	M0	Stage IA	1	1990	Locoregional Recurrence	TUMOR FREE	70	L-Lower	NO	Not Evaluated	80
TCGA-NK-A5CX	23		MALE	111	LUSC	Alive	T2b	N0	MX	Stage IIA	0	111		TUMOR FREE	73	R-Lower	NO	Not Evaluated	40
TCGA-NK-A5D1	63		MALE	511	LUSC	Alive	T2a	N1	M0	Stage IIA	1	151	Distant Metastasis	WITH TUMOR	57	R-Upper	NO	Not Evaluated	90
TCGA-NK-A7XE	49		MALE	13	LUSC	Alive	T4	N2	M0	Stage IIIB	0	13		TUMOR FREE	66	L-Upper	NO	Not Available	80
TCGA-O2-A52N	25		MALE	1006	LUSC	Dead	T2	N0	MX	Stage I	0	1006		TUMOR FREE	78	R-Upper	NO	Not Available	4.125
TCGA-O2-A52Q	20		FEMALE	113	LUSC	Dead	T3	N1	MX	Stage III	1	87	Distant Metastasis	WITH TUMOR	44	R-Upper	NO	Not Evaluated	1
TCGA-O2-A52S	30		FEMALE	387	LUSC	Dead	T4	N2	MX	Stage III	1	246	Distant Metastasis	WITH TUMOR	57	L-Lower	NO	Not Evaluated	3
TCGA-O2-A52V	25		FEMALE	1335	LUSC	Dead	T3	N0	MX	Stage II	1	690	Distant Metastasis	TUMOR FREE	75	L-Upper	NO	Not Evaluated	1
TCGA-O2-A52W	14		MALE	261	LUSC	Dead	T2	N0	MX	Stage I	0	261		TUMOR FREE	63	R-Lower	NO	Not Evaluated	2.5
TCGA-O2-A5IB	54		FEMALE	340	LUSC	Dead	T3	N1	MX	Stage III	1	253	Distant Metastasis	WITH TUMOR	71	R-Middle	NO	Not Evaluated	2.5
TCGA-XC-AA0X	50		FEMALE	6	LUSC	Dead	T1a	N0	M0	Stage IA	0	6		TUMOR FREE	77	R-Lower	NO	R0	30
TCGA-05-4244	52		MALE	0	LUAD	Alive	T2	N2	M1	Stage IV	0	0		TUMOR FREE	70	R-Lower	Not Available	RX	38
TCGA-05-4249	70		MALE	1523	LUAD	Alive	T2	N0	M0	Stage IB	0	1523		TUMOR FREE	67	R-Lower	Not Available	R0	52
TCGA-05-4250	53		FEMALE	121	LUAD	Dead	T3	N1	M0	Stage IIIA	0	121		Not Available	79	R-Lower	Not Available	R2	47
TCGA-05-4382	116		MALE	607	LUAD	Alive	T2	N0	M0	Stage IB	1	334	Distant Metastasis	TUMOR FREE	68	L-Upper	Not Available	R0	62
TCGA-05-4384	19		MALE	426	LUAD	Alive	T2	N2	M0	Stage IIIA	1	183	Distant Metastasis	Not Available	66	R-Lower	Not Available	RX	20
TCGA-05-4389	159		MALE	1369	LUAD	Alive	T1	N0	M0	Stage IA	0	1369		TUMOR FREE	70	R-Upper	Not Available	R0	43
TCGA-05-4390	16		FEMALE	1126	LUAD	Alive	T2	N0	M0	Stage IB	1	395		TUMOR FREE	58	R-Upper	Not Available	R0	15
TCGA-05-4395	21		MALE	0	LUAD	Dead	T4	N2	M0	Stage IIIB	0	0		TUMOR FREE	76	L-Upper	Not Available	R0	Not Available
TCGA-05-4396	15		MALE	303	LUAD	Dead	T4	N1	M0	Stage IIIB	0	303		Not Available	76	R-Lower	Not Available	R0	19
TCGA-05-4397	140		MALE	731	LUAD	Dead	T2	N1	M0	Stage IIB	0	731		Not Available	65	R-Middle	Not Available	R0	45
TCGA-05-4398	131		FEMALE	1431	LUAD	Alive	T4	N3	M0	Stage IIIB	0	1431		TUMOR FREE	47	R-Upper	Not Available	R0	72
TCGA-05-4402	52		FEMALE	244	LUAD	Dead	T2	NX	M1	Stage IV	0	244		TUMOR FREE	57	R-Lower	Not Available	R2	Not Available
TCGA-05-4403	26		MALE	578	LUAD	Alive	T2	N0	M0	Stage IB	0	578		Not Available	76	R-Upper	Not Available	R0	Not Available
TCGA-05-4405	35		FEMALE	610	LUAD	Alive	T2	N0	M0	Stage IB	0	610		TUMOR FREE	74	R-Lower	Not Available	R0	65
TCGA-05-4410	50		MALE	0	LUAD	Alive	T2	N0	M0	Stage IB	0	0		Not Available	62	L-Upper	Not Available	RX	98
TCGA-05-4415	14		MALE	91	LUAD	Dead	T4	N2	M0	Stage IIIB	1	60		WITH TUMOR	57	L-Lower	Not Available	R0	29
TCGA-05-4417	37		FEMALE	455	LUAD	Alive	T2	N0	M0	Stage IB	0	455		TUMOR FREE	51	R-Upper	Not Available	R0	56
TCGA-05-4418	81		MALE	274	LUAD	Dead	T3	N2	M0	Stage IIIA	0	274		Not Available	69	L-Lower	Not Available	R0	25
TCGA-05-4420	76		MALE	912	LUAD	Alive	T2	N0	M0	Stage IB	0	912		TUMOR FREE	41	R-Lower	Not Available	R0	38
TCGA-05-4422	141		MALE	365	LUAD	Alive	T2	N0	M0	Stage IB	0	365		Not Available	68	L-Lower	Not Available	R0	147
TCGA-05-4424	39		MALE	913	LUAD	Alive	T3	N0	M0	Stage IIB	1	153	Distant Metastasis	WITH TUMOR	70	R-Upper	Not Available	R1	50
TCGA-05-4425	50		FEMALE	669	LUAD	Alive	T2	N0	M1	Stage IV	0	669		Not Available	70	R-Middle	Not Available	R1	28
TCGA-05-4426	109		MALE	791	LUAD	Alive	T2	N0	M0	Stage IB	1	457		TUMOR FREE	71	L-Lower	Not Available	R0	20
TCGA-05-4427	37		FEMALE	791	LUAD	Alive	T2	N1	M0	Stage IIB	0	791		TUMOR FREE	65	L-Upper	Not Available	R0	8
TCGA-05-4430	83		FEMALE	761	LUAD	Alive	T2	N0	M0	Stage IB	0	761		TUMOR FREE	59	L-Lower	Not Available	R0	80
TCGA-05-4432	79		MALE	761	LUAD	Alive	T2	N1	M0	Stage IIB	0	761		TUMOR FREE	66	R-Upper	Not Available	R0	58
TCGA-05-4433	35		MALE	730	LUAD	Alive	T2	N0	M0	Stage IB	0	730		TUMOR FREE	82	L-Lower	Not Available	R0	1
TCGA-05-4434	163		FEMALE	457	LUAD	Dead	T4	N1	M1	Stage IV	0	457		Not Available	67	R-Lower	Not Available	R2	15
TCGA-05-5420	41		MALE	457	LUAD	Alive	T2	N2	M0	Stage IIIA	1	245		TUMOR FREE	67	L-Upper	Not Available	R0	40
TCGA-05-5423	61		MALE	151	LUAD	Alive	T2	N1	M0	Stage IIB	0	151		TUMOR FREE	65	L-Upper	Not Available	R0	72
TCGA-05-5425	36		MALE	882	LUAD	Alive	T2b	N1	M0	Stage IIB	1	486		TUMOR FREE	68	R-Upper	Not Available	R0	40
TCGA-05-5428	11		MALE	670	LUAD	Alive	T1b	N1	M0	Stage IIA	0	670		TUMOR FREE	57	R-Upper	Not Available	R0	30
TCGA-05-5429	5		MALE	275	LUAD	Dead	T3	N2	M0	Stage IIIA	0	275		TUMOR FREE	60	L-Upper	Not Available	R0	Not Available
TCGA-05-5715	22		FEMALE	62	LUAD	Alive	T2a	N0	M0	Stage IB	0	62		TUMOR FREE	69	L-Upper	Not Available	R0	Not Available
TCGA-35-3615	20		MALE	14	LUAD	Alive	T2	N0	M0	Stage IB	0	14		TUMOR FREE	57	R-Upper	NO	R0	Not Available
TCGA-35-4122	34		MALE	225	LUAD	Alive	T1	N0	M0	Stage IA	0	225		TUMOR FREE	69	L-Upper	NO	R0	45
TCGA-35-4123	69		MALE	182	LUAD	Alive	T1	N0	M0	Stage IA	0	182		TUMOR FREE	38	R-Upper	NO	R0	20
TCGA-35-5375	12		MALE	264	LUAD	Alive	T2	N2	M0	Stage IIIA	0	264		TUMOR FREE	61	L-Upper	Not Available	R0	35
TCGA-38-4625	110	89	FEMALE	2973	LUAD	Alive	T2a	N0	M0	Stage IB	0	2973		Not Available	66	R-Upper	NO	R0	50
TCGA-38-4626	79	65	FEMALE	3674	LUAD	Alive	T2b	N0	M0		1	2518	New Primary Tumor	TUMOR FREE	57	L-Upper	Not Available	R0	40
TCGA-38-4627	59	60	FEMALE	1147	LUAD	Dead	T1b	N1	M0	Stage IIA	0	1147		Not Available	64	R-Upper	Not Available	R0	Not Available
TCGA-38-4628	31		FEMALE	1492	LUAD	Dead	T2	N1	M0	Stage IIB	1	1083		WITH TUMOR	65	R-Upper	NO	R0	Not Available
TCGA-38-4629	42		MALE	864	LUAD	Dead	T3	N0	M0	Stage IIB	1	379		WITH TUMOR	68	R-Upper	NO	R0	100
TCGA-38-4630	85		FEMALE	1073	LUAD	Dead	T2	N0	M0	Stage IB	1	524		WITH TUMOR	75	R-Upper	NO	R1	Not Available
TCGA-38-4631	14		FEMALE	354	LUAD	Dead	T2	N0	M0	Stage IB	1			WITH TUMOR	72	L-Upper	NO	R0	40
TCGA-38-4632	22	26	MALE	1357	LUAD	Dead	T2	N1	M1	Stage IV	1	680		WITH TUMOR	42	L-Upper	NO	R0	10
TCGA-38-6178	26		FEMALE	448	LUAD	Alive	T2b	N2		Stage IIIA	1			WITH TUMOR	70	L-Upper	YES	R1	Not Available
TCGA-38-7271	94		FEMALE	800	LUAD	Dead	T1	N0	M0	Stage IA	1	304		WITH TUMOR	72	R-Upper	NO	R0	25
TCGA-38-A44F	49		MALE	133	LUAD	Alive	T2a	N0	M0	Stage IB	0	133		TUMOR FREE	80	R-Upper	NO	R0	12
TCGA-44-2655	83	146	FEMALE	1324	LUAD	Alive	T1	N0	M0	Stage IA	1	1009	New Primary Tumor	TUMOR FREE	65	R-Upper	Not Available	R0	30
TCGA-44-2656	116		MALE	1429	LUAD	Alive	T2	N0	M0	Stage IB	1	568	New Primary Tumor	TUMOR FREE	59	R-Upper	Not Available	Not Available	23
TCGA-44-2657	109	180	FEMALE	1351	LUAD	Alive	T2	NX	M0	Stage IB	0	1351		TUMOR FREE	74	L-Upper	Not Available	R0	25
TCGA-44-2659	77		FEMALE	1367	LUAD	Alive	T1	N1	M0	Stage IIB	1	1146	Locoregional Recurrence	TUMOR FREE	65	Discrepancy	Not Available	R0	57
TCGA-44-2661	137	69	FEMALE	1159	LUAD	Alive	T1	N0	M0	Stage IA	0	1159		TUMOR FREE	69	L-Upper	Not Available	R0	Not Available
TCGA-44-2662	57	69	MALE	1280	LUAD	Alive	T2	N0	M0	Stage IB	1	245		Discrepancy	65	R-Upper	Not Available	R0	56
TCGA-44-2665	44	51	FEMALE	1301	LUAD	Alive	T2	N1	M0	Stage IIB	0	1301		TUMOR FREE	55	R-Upper	Not Available	R0	Not Available
TCGA-44-2666	112		MALE	97	LUAD	Dead	T2	N0	M0	Stage IB	1			WITH TUMOR	43	R-Upper	Not Available	R0	30
TCGA-44-2668	106	79	MALE	761	LUAD	Dead	T2	N0	M0	Stage IB	1	433		TUMOR FREE	51	R-Upper	Not Available	R0	60
TCGA-44-3396	101	132	FEMALE	1130	LUAD	Alive	T2	N2	M0	Stage IIIA	0	1130		TUMOR FREE	74	Discrepancy	Not Available	R0	50
TCGA-44-3398	52	98	FEMALE	1163	LUAD	Alive	T1b	N0	M0	Stage IA	0	1163		TUMOR FREE	77	R-Lower	Not Available	R0	60
TCGA-44-3917	68		FEMALE	1183	LUAD	Alive	T2	N0	M0	Stage IB	0	1183		TUMOR FREE	33	R-Upper	Not Available	R0	16
TCGA-44-3918	136		FEMALE	1036	LUAD	Alive	T1	N0	M0	Stage IA	1	511	Locoregional Recurrence	TUMOR FREE	60	L-Upper	Not Available	R0	20
TCGA-44-3919	155		FEMALE	1026	LUAD	Dead	T1	N0	M0	Stage IA	1	921	Locoregional Recurrence	TUMOR FREE	71	R-Upper	Not Available	R0	Not Available
TCGA-44-4112	89		FEMALE	808	LUAD	Dead	T2a	N0	M0	Stage IB	1	619		Not Available	60	R-Upper	Not Available	R0	30
TCGA-44-5643	45		MALE	1013	LUAD	Alive	T2b	N2	M0	Stage IIIA	1			TUMOR FREE	53	R-Lower	Not Available	Not Available	20
TCGA-44-5644	11		FEMALE	863	LUAD	Alive	T2a	N0		Stage IB	0	863		TUMOR FREE	51	R-Lower	Not Available	Not Available	17.5
TCGA-44-5645	162	83	FEMALE	852	LUAD	Alive	T1	NX		Stage IA	0	852		TUMOR FREE	61	L-Upper	Not Available	Not Available	5
TCGA-44-6145	50	34	FEMALE	595	LUAD	Alive	T1	N0	M0	Stage IA	0	595		TUMOR FREE	62	R-Upper	Not Available	Not Available	75
TCGA-44-6146	43	48	MALE	728	LUAD	Alive	T3	N0	M0	Stage IIB	1	631	Locoregional Recurrence	TUMOR FREE	64	L-Lower	Not Available	Not Available	15
TCGA-44-6147	79	52	FEMALE	845	LUAD	Alive	T1b	NX	M0	Stage IA	0	845		TUMOR FREE	67	R-Upper	Not Available	Not Available	Not Available
TCGA-44-6148	104	75	MALE	704	LUAD	Alive	T1b	N0	M0	Stage IA	0	704		TUMOR FREE	60	L-Lower	Not Available	RX	60
TCGA-44-6774	42		FEMALE	658	LUAD	Alive	T1	N2	M0	Stage IIIA	0	658		Not Available	56	L-Lower	Not Available	Not Available	20
TCGA-44-6775	41		FEMALE	705	LUAD	Alive	T2a	N0	MX	Stage IB	1	684	Locoregional Recurrence	Not Available	72	R-Upper	Not Available	RX	25
TCGA-44-6776	13	24	FEMALE	2616	LUAD	Alive	T1	N0	MX	Stage IA	0	2616		TUMOR FREE	60	R-Upper	Not Available	Not Available	45
TCGA-44-6777	43	64	FEMALE	987	LUAD	Dead	T2	NX	MX	Stage IB	0	987		TUMOR FREE	85	L-Upper	Not Available	Not Available	64
TCGA-44-6778	87	70	MALE	1864	LUAD	Alive	T1	N0	MX	Stage IA	0	1864		TUMOR FREE	59	Discrepancy	Not Available	Not Available	15
TCGA-44-6779	13		FEMALE	500	LUAD	Dead	T2	N1	MX	Stage IIB	1	232		WITH TUMOR	50	Discrepancy	Not Available	Not Available	15
TCGA-44-7659	37		MALE	691	LUAD	Alive	T1b	N0	MX	Stage IA	0	691		TUMOR FREE	70	L-Upper	Not Available	Not Available	40
TCGA-44-7660	44		MALE	592	LUAD	Alive	T2	N0	MX	Stage IB	1	253	Locoregional Recurrence	TUMOR FREE	72	R-Upper	Not Available	Not Available	124
TCGA-44-7661	76		FEMALE	557	LUAD	Dead	T2a	N0	M0	Stage IB	1	335	Locoregional Recurrence	TUMOR FREE	69	R-Lower	YES	Not Available	22
TCGA-44-7662	75		MALE	218	LUAD	Alive	T2a	N0	MX	Stage IB	0	218		TUMOR FREE	61	L-Upper	Not Available	Not Available	50
TCGA-44-7667	7		FEMALE	1097	LUAD	Alive	T3	N0	MX	Stage IIB	0	1097		TUMOR FREE	49	R-Lower	Not Available	Not Available	50
TCGA-44-7669	40		MALE	574	LUAD	Dead	T1b	N1	MX	Stage IIA	1	390		WITH TUMOR	59	R-Upper	Not Available	Not Available	20
TCGA-44-7670	38		FEMALE	882	LUAD	Alive	T1b	N1	M0	Stage IIA	0	882		TUMOR FREE	47	L-Upper	Not Available	Not Available	30
TCGA-44-7671	20		MALE	889	LUAD	Alive	T2a	N0	M0	Stage IB	1	883	Locoregional Recurrence	TUMOR FREE	64	Not Available	Not Available	Not Available	Not Available
TCGA-44-7672	96		FEMALE	719	LUAD	Alive	T1b	N0	M0	Stage IA	0	719		TUMOR FREE	52	L-Upper	Not Available	Not Available	20
TCGA-44-8117	27		FEMALE	385	LUAD	Alive	T2a	N0	M0	Stage IB	0	385		TUMOR FREE	54	R-Upper	Unknown	Not Available	54
TCGA-44-8119	42		MALE	285	LUAD	Alive	T3	N0	M0	Stage IIB	0	285		TUMOR FREE	73	R-Upper	Unknown	Not Available	50
TCGA-44-8120	61		MALE	260	LUAD	Alive	T2a	N0	M0	Stage IB	0	260		TUMOR FREE	58	R-Upper	Unknown	Not Available	30
TCGA-44-A479	64		FEMALE	486	LUAD	Alive	T2	N0	MX	Stage IB	1	437	New Primary Tumor	TUMOR FREE	73	R-Upper	YES	R0	40
TCGA-44-A47A	87		FEMALE	466	LUAD	Alive	T2a	N0	MX	Stage IB	1	397	Distant Metastasis	TUMOR FREE	78	R-Upper	NO	R0	80
TCGA-44-A47B	27		MALE	287	LUAD	Alive	T2a	N0	M0	Stage IB	0	287		TUMOR FREE	79	R-Upper	NO	R0	4.5
TCGA-44-A47G	92		FEMALE	351	LUAD	Alive	T1	N0	M0	Stage IA	0	351		TUMOR FREE	73	R-Upper	NO	R0	28
TCGA-44-A4SS	46		MALE	415	LUAD	Alive	T1b	N0	M0	Stage IA	0	415		TUMOR FREE	73	L-Upper	Not Available	Not Available	90
TCGA-44-A4SU	96		FEMALE	409	LUAD	Dead	T1a	N0	MX	Stage IA	1	260	Locoregional Recurrence	TUMOR FREE	67	R-Lower	Not Available	R0	50
TCGA-49-4486	14		MALE	2318	LUAD	Dead	T1	N0	M0	Stage IA	1	2045	Distant Metastasis	WITH TUMOR	72	R-Lower	Not Available	R0	17.5
TCGA-49-4487	37		FEMALE	855	LUAD	Dead	T1	N0	M0	Stage IA	1	697		WITH TUMOR	72	L-Upper	Not Available	R0	40
TCGA-49-4488	18		FEMALE	869	LUAD	Dead	T1	N0	MX	Stage IA	1	634		Not Available	74	L-Lower	Not Available	R0	Not Available
TCGA-49-4490	18	41	FEMALE	385	LUAD	Dead	T3	N2	M0	Stage IIIA	1			Not Available	45	L-Upper	Not Available	Not Available	5
TCGA-49-4494	24		MALE	1081	LUAD	Dead	T3	N2	M0	Stage IIIA	0	1081		WITH TUMOR	77	L-Upper	Not Available	R0	50
TCGA-49-4501	122		FEMALE	1421	LUAD	Dead	T2	N0	M0	Stage IB	1	545		WITH TUMOR	67	R-Upper	Not Available	R0	Not Available
TCGA-49-4505	66		FEMALE	428	LUAD	Dead	T2	N1	M0	Stage IIB	1	417	Distant Metastasis	WITH TUMOR	61	R-Lower	Not Available	R0	74
TCGA-49-4506	20		FEMALE	999	LUAD	Dead	T2	N1	M0	Stage IIB	1	692	Locoregional Recurrence	Discrepancy	68	L-Upper	Not Available	R1	100
TCGA-49-4507	26		FEMALE	268	LUAD	Dead	T3	N1	M0	Stage IIIA	1	158		WITH TUMOR	73	Discrepancy	Not Available	R0	78
TCGA-49-4510	76		FEMALE	896	LUAD	Dead	T2	N1	M0	Stage IIB	1	502	Distant Metastasis	WITH TUMOR	51	L-Upper	Not Available	R0	55.5
TCGA-49-4512	23	16	FEMALE	905	LUAD	Dead	T2	N2	MX	Stage IIIA	1			WITH TUMOR	69	R-Middle	Not Available	R1	Not Available
TCGA-49-4514	17		FEMALE	1700	LUAD	Alive	T1	N0	M0	Stage IA	0	1700		TUMOR FREE	79	L-Upper	Not Available	R0	65
TCGA-49-6742	11	32	MALE	488	LUAD	Dead	T2a	N1	M0	Stage IIA	1	214	Distant Metastasis	TUMOR FREE	70	L-Upper	Not Available	R0	10
TCGA-49-6743	30	29	FEMALE	1621	LUAD	Alive	T1	N2	MX	Stage IIIA	0	1621		TUMOR FREE	81	R-Upper	Not Available	Not Available	50
TCGA-49-6744	38	38	FEMALE	1683	LUAD	Alive	T2a	N1	MX	Stage IIA	0	1683		TUMOR FREE	64	L-Upper	Not Available	R0	20
TCGA-49-6745	28	35	MALE	522	LUAD	Alive	T2a	N2	M0	Stage IIIA	0	522		TUMOR FREE	82	L-Upper	YES	Not Available	20
TCGA-49-6761	27	31	FEMALE	354	LUAD	Alive	T1	N2	MX	Stage IIIA	0	354		TUMOR FREE	68	R-Upper	Not Available	R0	50
TCGA-49-6767	40		FEMALE	677	LUAD	Alive	T3	N0	MX	Stage IIB	0	677		TUMOR FREE	46	R-Middle	Not Available	R0	30
TCGA-49-AAQV	115		FEMALE	677	LUAD	Dead	T1	N1	MX	Stage II	1	509	Distant Metastasis	TUMOR FREE	63	L-Lower	YES	R0	Not Available
TCGA-49-AAR0	51		MALE	4765	LUAD	Alive	T1	N0	MX	Stage IA	0	4765		TUMOR FREE	57	R-Upper	Not Available	R0	37
TCGA-49-AAR2	46		MALE	2224	LUAD	Alive	T2	N0	MX	Stage IB	0	2224		TUMOR FREE	64	R-Lower	Not Available	R0	Not Available
TCGA-49-AAR3	35		MALE	1893	LUAD	Alive	T2	N1	MX	Stage IIB	1	1893	Locoregional Recurrence	Discrepancy	69	R-Upper	Not Available	R0	Not Available
TCGA-49-AAR4	73		MALE	879	LUAD	Dead	T2	N2	MX	Stage IIIA	0	879		WITH TUMOR	51	L-Upper	Not Available	R0	35
TCGA-49-AAR9	2		MALE	260	LUAD	Dead	T3	N0	MX	Stage IIB	0	260		WITH TUMOR	61	Other (please specify)	Not Available	R0	Not Available
TCGA-49-AARE	29		FEMALE	1229	LUAD	Dead	T1	N0	MX	Stage IA	1	388	Locoregional Recurrence	WITH TUMOR	51	R-Upper	Not Available	R0	15
TCGA-49-AARN	33		FEMALE	1135	LUAD	Dead	T1	N0	MX	Stage IA	0	1135		Unknown	56	R-Lower	Not Available	R0	Not Available
TCGA-49-AARO	59		FEMALE	3759	LUAD	Alive	T1a	N0	MX	Stage IA	1	1144	Locoregional Recurrence	WITH TUMOR	39	L-Upper	Not Available	R0	Not Available
TCGA-49-AARQ	30		FEMALE	6732	LUAD	Alive	T2	N0	MX	Stage I	0	6732		TUMOR FREE	41	R-Upper	Not Available	R0	60
TCGA-49-AARR	104		MALE	4992	LUAD	Alive	T1	N0	MX	Stage IA	1	1099	New Primary Tumor	TUMOR FREE	68	L-Upper	Not Available	R0	Not Available
TCGA-4B-A93V	20		FEMALE	300	LUAD	Dead	T1b	N0	M0	Stage IA	1	251	Distant Metastasis	WITH TUMOR	52	R-Lower	Not Available	R0	30
TCGA-50-5044	8		FEMALE	624	LUAD	Dead	T4	N1	M0	Stage IIIB	1	483	Distant Metastasis	WITH TUMOR	72	R-Lower	Not Available	Not Available	Not Available
TCGA-50-5045	124		FEMALE	2174	LUAD	Dead	T2	N1	M0		1	1433	Locoregional Recurrence	WITH TUMOR	57	R-Lower	Not Available	Not Available	Not Available
TCGA-50-5049	77		MALE	3094	LUAD	Alive	T2	N0	M0	Stage IA	1	1568	Locoregional Recurrence	TUMOR FREE	70	R-Upper	YES	Not Available	Not Available
TCGA-50-5051	16		FEMALE	478	LUAD	Dead	T2	N2	M0	Stage IIIA	1	184	Distant Metastasis	TUMOR FREE	42	L-Upper	YES	R0	30
TCGA-50-5055	110		FEMALE	1830	LUAD	Dead	T1	N1	M0	Stage IIA	1	771	Locoregional Recurrence	WITH TUMOR	79	L-Lower	YES	R0	Not Available
TCGA-50-5066	25		MALE	1442	LUAD	Alive	T2	N0	M0	Stage IB	1	477	Distant Metastasis	Not Available	72	R-Upper	YES	R0	Not Available
TCGA-50-5068	34		FEMALE	1499	LUAD	Dead	T2	N1	MX	Stage IIB	1	686	Distant Metastasis	WITH TUMOR	59	R-Lower	Not Available	Not Available	Not Available
TCGA-50-5072	21		MALE	250	LUAD	Dead	T2	N2	M0	Stage IIIA	1	213	Distant Metastasis	WITH TUMOR	74	L-Upper	YES	Not Available	15
TCGA-50-5930	16	20	MALE	282	LUAD	Dead	T2	N2	M0	Stage IIIA	1	177	Distant Metastasis	WITH TUMOR	47	Discrepancy	Not Available	Not Available	Not Available
TCGA-50-5931	21	28	FEMALE	434	LUAD	Dead	T2	N0	M0	Stage IB	1	425	Distant Metastasis	TUMOR FREE	75	L-Upper	Not Available	R0	40
TCGA-50-5932	15	39	MALE	1235	LUAD	Dead	T2	N1	M0	Stage IIB	1	1090	Locoregional Recurrence	WITH TUMOR	75	R-Upper	Not Available	Not Available	Not Available
TCGA-50-5933	34	44	MALE	2393	LUAD	Dead	T4	N2	M0	Stage IIIB	0	2393		TUMOR FREE	72	L-Lower	Not Available	Not Available	Not Available
TCGA-50-5935	42	35	FEMALE	653	LUAD	Dead	T1	N0	M0	Stage IA	0	653		Not Available	86	L-Upper	YES	Not Available	Not Available
TCGA-50-5936	28	52	MALE	257	LUAD	Dead	T2	N2	M0	Stage IIIA	1	150		Not Available	58	R-Lower	YES	Not Available	Not Available
TCGA-50-5939	18	43	MALE	460	LUAD	Dead	T2	N0	M0	Stage IB	0	460		TUMOR FREE	85	R-Upper	Not Available	Not Available	15
TCGA-50-5941	56		FEMALE	1474	LUAD	Alive	T2a	N2	M0	Stage IIIA	0	1474		Not Available	55	R-Upper	Not Available	Not Available	25
TCGA-50-5942	64		FEMALE	1847	LUAD	Alive	T1	N0	M0	Stage IA	1	1378	Locoregional Recurrence	Not Available	67	R-Upper	Not Available	R0	30
TCGA-50-5944	32		FEMALE	1750	LUAD	Alive	T1	N0	M0	Stage IA	0	1750		TUMOR FREE	69	R-Upper	Not Available	R0	Not Available
TCGA-50-5946	58		MALE	1617	LUAD	Alive	T1	N0	MX	Stage IA	1	221	Distant Metastasis	WITH TUMOR	62	R-Upper	Not Available	Not Available	Not Available
TCGA-50-6590	43		FEMALE	1288	LUAD	Dead	T2	N0	M0	Stage IB	0	1288		TUMOR FREE	72	R-Upper	YES	Not Available	50
TCGA-50-6591	8		FEMALE	119	LUAD	Dead	T2	N0	M1	Stage IV	1			WITH TUMOR	63	L-Lower	Not Available	Not Available	Not Available
TCGA-50-6592	40		FEMALE	777	LUAD	Dead	T2	N0	M0	Stage IB	1			WITH TUMOR	71	L-Lower	Not Available	Not Available	Not Available
TCGA-50-6593	29		FEMALE	336	LUAD	Dead	T1	N2	M0	Stage IIIA	1	266	Distant Metastasis	WITH TUMOR	49	R-Upper	YES	R0	Not Available
TCGA-50-6594	28		FEMALE	370	LUAD	Dead	T3	N2	M0	Stage IIIA	1	285	Distant Metastasis	WITH TUMOR	79	L-Upper	Not Available	Not Available	Not Available
TCGA-50-6595	17	95	FEMALE	189	LUAD	Dead	T2	N2	M0	Stage IIIA	1	182	Distant Metastasis	WITH TUMOR	74	R-Upper	YES	Not Available	Not Available
TCGA-50-6597	22		FEMALE	1268	LUAD	Dead	T2	N0	M0	Stage IB	0	1268		TUMOR FREE	79	R-Lower	YES	R0	Not Available
TCGA-50-6673	17		FEMALE	22	LUAD	Dead	T1	N0	M0	Stage I	0	22		Not Available	84	R-Upper	Not Available	R0	Not Available
TCGA-50-7109	29		MALE	308	LUAD	Dead	T1	N0	M0	Stage IA	1	15	Distant Metastasis	Not Available	60	R-Lower	Not Available	Not Available	120
TCGA-50-8457	130		FEMALE	1125	LUAD	Alive	T1a	N0	M0	Stage IA	0	1125		TUMOR FREE	63	R-Upper	YES	Not Available	30
TCGA-50-8459	68		MALE	1119	LUAD	Alive	T3	N0	M0	Stage IIB	1	432	Locoregional Recurrence	WITH TUMOR	68	R-Lower	YES	Not Available	10
TCGA-50-8460	66		MALE	829	LUAD	Alive	T1a	N0	M0	Stage IA	0	829		Unknown	74	R-Upper	YES	R0	Not Available
TCGA-53-7624	10		FEMALE	1043	LUAD	Dead	T2	N0	M1	Stage IV	1	400	Distant Metastasis	WITH TUMOR	40	R-Upper	NO	R0	50
TCGA-53-7626	125		FEMALE	929	LUAD	Dead	T1	N1	M0	Stage IIA	1	865	Locoregional Recurrence	WITH TUMOR	76	R-Upper	NO	R0	35
TCGA-53-7813	21		FEMALE	424	LUAD	Alive	T4	N0	M0	Stage IIIB	0	424		TUMOR FREE	51	R-Upper	NO	Not Available	35
TCGA-53-A4EZ	35		MALE	1071	LUAD	Alive	T2a	N1	MX	Stage IIA	0	1071		TUMOR FREE	63	L-Upper	YES	RX	40
TCGA-55-1592	58		MALE	701	LUAD	Dead	T2	N0	M0	Stage IA	1	452		WITH TUMOR	65	L-Upper	Not Available	R0	Not Available
TCGA-55-1594	52		MALE	1178	LUAD	Alive	T2	N2	M0	Stage IIIA	0	1178		TUMOR FREE	68	R-Lower	Not Available	R0	Not Available
TCGA-55-1596	25		MALE	2065	LUAD	Alive	T2	N1	M0	Stage IIB	0	2065		TUMOR FREE	55	R-Upper	Not Available	R0	50
TCGA-55-5899	24		MALE	930	LUAD	Alive	T1a	N1	M0		0	930		Not Available	58	R-Upper	Not Available	R0	Not Available
TCGA-55-6543	17		FEMALE	435	LUAD	Alive	T1b	N0	MX	Stage IA	0	435		TUMOR FREE	60	R-Upper	Not Available	Not Available	60
TCGA-55-6642	43		MALE	2449	LUAD	Alive	T2	N0	MX	Stage IB	0	2449		TUMOR FREE	63	R-Lower	Not Available	R0	Not Available
TCGA-55-6712	20		MALE	171	LUAD	Dead	T2a	N1	MX	Stage IIA	1			WITH TUMOR	71	L-Upper	Not Available	R1	Not Available
TCGA-55-6968	72	54	MALE	1293	LUAD	Dead	T1	N0	M1	Stage IV	1			WITH TUMOR	61	R-Lower	Not Available	Not Available	Not Available
TCGA-55-6970	47	73	FEMALE	464	LUAD	Dead	T2	N2	MX	Stage IIIA	1	457	Locoregional Recurrence	WITH TUMOR	67	R-Upper	NO	R1	Not Available
TCGA-55-6971	68	37	FEMALE	1400	LUAD	Alive	T2	N0	MX	Stage IB	0	1400		TUMOR FREE	59	L-Lower	NO	R0	60
TCGA-55-6972	11	33	MALE	1632	LUAD	Dead	T2	N0	M0	Stage IB	0	1632		TUMOR FREE	72	R-Upper	NO	R0	Not Available
TCGA-55-6975	14	28	MALE	118	LUAD	Dead	T2	N1	M0	Stage IIB	1			WITH TUMOR	61	L-Lower	NO	Not Available	Not Available
TCGA-55-6978	83	29	MALE	176	LUAD	Dead	T2b	N0	MX	Stage IIA	1	42		WITH TUMOR	81	R-Middle	NO	Not Available	Not Available
TCGA-55-6979	37	37	FEMALE	237	LUAD	Dead	T2	N1	M0	Stage IIB	1	195	Distant Metastasis	WITH TUMOR	59	L-Upper	NO	Not Available	Not Available
TCGA-55-6980	34	35	MALE	2109	LUAD	Alive	T1	N0	M0	Stage IA	0	2109		TUMOR FREE	56	R-Lower	NO	R0	Not Available
TCGA-55-6981	15	32	FEMALE	1379	LUAD	Dead	T1	N2	M0	Stage IIIA	0	1379		TUMOR FREE	53	L-Upper	NO	R0	Not Available
TCGA-55-6982	23	57	FEMALE	995	LUAD	Dead	T2	N1	M0	Stage IIB	1	183	Distant Metastasis	WITH TUMOR	79	R-Lower	NO	Not Available	Not Available
TCGA-55-6983	103	35	MALE	2823	LUAD	Alive	T2	N1	M0	Stage IIB	0	2823		TUMOR FREE	81	L-Lower	NO	R0	60
TCGA-55-6984	16	84	FEMALE	760	LUAD	Dead	T2	N1	M0	Stage IIB	1	724		WITH TUMOR	71	L-Lower	NO	Not Available	Not Available
TCGA-55-6985	31	63	FEMALE	1233	LUAD	Alive	T2	N0	MX	Stage IB	0	1233		TUMOR FREE	58	L-Upper	NO	R0	50
TCGA-55-6986	30	121	FEMALE	3261	LUAD	Alive	T2	N0	M0	Stage IB	0	3261		TUMOR FREE	74	R-Lower	NO	Not Available	Not Available
TCGA-55-6987	161		MALE	2137	LUAD	Alive	T1	N0	M0	Stage IA	0	2137		TUMOR FREE	77	L-Lower	NO	Not Available	Not Available
TCGA-55-7227	63		MALE	952	LUAD	Dead	T3	N1	MX	Stage IIIA	1	255	Locoregional Recurrence	TUMOR FREE	77	R-Lower	Not Available	R0	Not Available
TCGA-55-7281	27		FEMALE	872	LUAD	Alive	T1b	N0	M0	Stage IA	1	339	Distant Metastasis	TUMOR FREE	70	R-Middle	Not Available	R0	20
TCGA-55-7283	33		FEMALE	609	LUAD	Alive	T3	N2	MX	Stage IIIA	1			WITH TUMOR	76	R-Upper	NO	Not Available	5
TCGA-55-7284	55		MALE	243	LUAD	Dead	T3	N0	MX	Stage IIB	1	231	Distant Metastasis	TUMOR FREE	74	R-Lower	Not Available	R0	Not Available
TCGA-55-7570	142		MALE	824	LUAD	Alive	T1a	N0	MX	Stage IA	0	824		TUMOR FREE	60	R-Upper	Not Available	R0	Not Available
TCGA-55-7573	35		FEMALE	487	LUAD	Alive	T1b	N0	MX	Stage IA	0	487		TUMOR FREE	72	R-Upper	NO	Not Available	Not Available
TCGA-55-7574	56		FEMALE	995	LUAD	Dead	T2a	N0	M0	Stage IB	1	478	Distant Metastasis	WITH TUMOR	64	R-Upper	Not Available	R1	2
TCGA-55-7576	79		MALE	670	LUAD	Alive	T2a	N0	M0	Stage IB	0	670		TUMOR FREE	54	R-Upper	Not Available	R0	Not Available
TCGA-55-7724	22		FEMALE	705	LUAD	Alive	T2a	N0	MX	Stage IB	0	705		TUMOR FREE	76	L-Upper	Not Available	R0	50
TCGA-55-7725	17		FEMALE	442	LUAD	Alive	T1a	N0	MX	Stage IA	0	442		TUMOR FREE	68	R-Lower	NO	R0	16
TCGA-55-7726	11		FEMALE	652	LUAD	Alive	T1b	N0	MX	Stage IA	0	652		TUMOR FREE	72	L-Lower	Not Available	R0	30
TCGA-55-7727	33		MALE	119	LUAD	Alive	T1a	N2	MX	Stage IIIA	0	119		TUMOR FREE	70	L-Upper	Not Available	R0	Not Available
TCGA-55-7728	116		FEMALE	704	LUAD	Alive	T2a	N0	MX	Stage IB	0	704		TUMOR FREE	64	L-Upper	NO	R0	30
TCGA-55-7815	14		MALE	773	LUAD	Alive	T2a	N0	MX	Stage IB	1	466	Locoregional Recurrence	TUMOR FREE	76	R-Lower	Not Available	R0	Not Available
TCGA-55-7816	65		FEMALE	468	LUAD	Dead	TX	NX	MX	Stage IV	1			WITH TUMOR	49	R-Upper	Not Available	Not Available	Not Available
TCGA-55-7903	37		MALE	567	LUAD	Alive	T1b	N0	MX	Stage IA	0	567		TUMOR FREE	64	R-Lower	NO	R0	40
TCGA-55-7907	24		MALE	343	LUAD	Dead	T2a	N1	MX	Stage IIA	1	294	Distant Metastasis	TUMOR FREE	77	L-Upper	Not Available	R0	80
TCGA-55-7910	19		FEMALE	1040	LUAD	Alive	T2b	N0	M0	Stage IIA	1	1018		WITH TUMOR	50	L-Lower	Not Available	R0	15
TCGA-55-7911	81		FEMALE	537	LUAD	Alive	T1a	N0	MX	Stage IA	1	515	New Primary Tumor	TUMOR FREE	70	R-Middle	NO	R0	96
TCGA-55-7913	53		FEMALE	561	LUAD	Dead	T1b	N0	MX	Stage IA	1	480	Distant Metastasis	TUMOR FREE	61	L-Lower	YES	R0	40
TCGA-55-7914	42		FEMALE	187	LUAD	Dead	T1b	N1	MX	Stage IIA	1			WITH TUMOR	71	R-Upper	YES	R0	5
TCGA-55-7994	90		MALE	603	LUAD	Alive	T3	N0	MX	Stage IIB	0	603		TUMOR FREE	81	R-Upper	NO	R0	28
TCGA-55-7995	168		FEMALE	889	LUAD	Alive	T1b	N0	M0	Stage IA	1	468	Locoregional Recurrence	TUMOR FREE	73	L-Upper	NO	R0	60
TCGA-55-8085	73		MALE	904	LUAD	Alive	T1b	N0	M0	Stage IA	0	904		TUMOR FREE	64	L-Lower	Unknown	R0	Not Available
TCGA-55-8087	118		FEMALE	462	LUAD	Alive	T2a	N0	MX	Stage IB	0	462		TUMOR FREE	59	R-Upper	NO	R0	Not Available
TCGA-55-8089	115		MALE	702	LUAD	Dead	T1a	N0	M0	Stage IA	0	702		TUMOR FREE	56	R-Upper	YES	R0	97
TCGA-55-8090	80		MALE	598	LUAD	Dead	T1a	N0	M0	Stage IA	1	548	Distant Metastasis	WITH TUMOR	80	R-Lower	Not Available	R0	Not Available
TCGA-55-8091	45		MALE	600	LUAD	Alive	T2	N0	MX	Stage IB	0	600		TUMOR FREE	74	R-Lower	NO	R0	Not Available
TCGA-55-8092	61		MALE	154	LUAD	Dead	T3	N0	MX	Stage IIB	1	127	Locoregional Recurrence	TUMOR FREE	75	R-Upper	Not Available	R0	40
TCGA-55-8094	11		MALE	541	LUAD	Alive	T2b	N0	M1b	Stage IV	1			WITH TUMOR	51	L-Upper	YES	R0	70
TCGA-55-8096	78		FEMALE	719	LUAD	Dead	T2a	N0	MX	Stage IB	1	566	Distant Metastasis	WITH TUMOR	67	L-Upper	NO	Not Available	104
TCGA-55-8097	88		FEMALE	476	LUAD	Alive	T1a	N0	MX	Stage IA	0	476		TUMOR FREE	60	R-Upper	NO	R0	35
TCGA-55-8203	95		FEMALE	547	LUAD	Alive	T1b	N0	M0	Stage IA	0	547		TUMOR FREE	69	R-Lower	NO	R0	50
TCGA-55-8204	32		FEMALE	515	LUAD	Alive	T2a	N0	MX	Stage IB	0	515		TUMOR FREE	87	L-Upper	Unknown	R0	Not Available
TCGA-55-8205	109		FEMALE	599	LUAD	Alive	T2b	N0	M0	Stage IIA	1	495	Distant Metastasis	TUMOR FREE	76	R-Lower	YES	R0	30
TCGA-55-8206	121		MALE	888	LUAD	Alive	T1b	N0	M0	Stage IA	0	888		TUMOR FREE	56	R-Upper	Not Available	R0	Not Available
TCGA-55-8207	52		MALE	977	LUAD	Alive	T2a	N0	MX	Stage IB	0	977		TUMOR FREE	73	L-Lower	Unknown	R0	Not Available
TCGA-55-8208	91		FEMALE	674	LUAD	Alive	T1b	N0	M0	Stage IA	1	511	Distant Metastasis	TUMOR FREE	73	R-Upper	Not Available	R0	50
TCGA-55-8299	107		FEMALE	469	LUAD	Dead	T1b	N0	MX	Stage IA	1	274	Distant Metastasis	TUMOR FREE	61	R-Upper	Not Available	R0	20
TCGA-55-8301	106		MALE	534	LUAD	Alive	T2a	N0	MX	Stage IB	1	238	Locoregional Recurrence	TUMOR FREE	58	R-Lower	Not Available	R0	100
TCGA-55-8302	29		MALE	478	LUAD	Alive	T2	N0	MX	Stage IB	0	478		TUMOR FREE	54	R-Lower	Unknown	R0	59
TCGA-55-8505	12		MALE	440	LUAD	Alive	T1a	N2	MX	Stage IIIA	0	440		TUMOR FREE	62	R-Lower	Unknown	R0	Not Available
TCGA-55-8506	10		FEMALE	11	LUAD	Alive	T3	N0	MX	Stage IIB	0	11		Unknown	62	R-Upper	Unknown	R0	Not Available
TCGA-55-8507	30		MALE	418	LUAD	Alive	T1a	N0	MX	Stage IA	0	418		TUMOR FREE	53	R-Upper	Unknown	R0	120
TCGA-55-8508	15		FEMALE	617	LUAD	Alive	T2a	N1	MX	Stage IIA	0	617		Unknown	60	R-Upper	Unknown	R0	Not Available
TCGA-55-8510	86		FEMALE	539	LUAD	Alive	T2a	N0	MX	Stage IB	0	539		TUMOR FREE	55	R-Lower	Unknown	R0	Not Available
TCGA-55-8511	44		FEMALE	552	LUAD	Alive	T2a	N0	MX	Stage IB	1	460		TUMOR FREE	73	R-Upper	Unknown	R0	58
TCGA-55-8512	65		MALE	607	LUAD	Dead	T1a	N1	M1b	Stage IV	1			WITH TUMOR	41	R-Lower	Unknown	R0	19
TCGA-55-8513	32		FEMALE	791	LUAD	Alive	T3	N0	MX	Stage IIB	1	317	Distant Metastasis	TUMOR FREE	77	L-Lower	YES	R0	Not Available
TCGA-55-8514	17		FEMALE	520	LUAD	Alive	T2a	N0	MX	Stage IB	0	520		TUMOR FREE	70	R-Upper	Unknown	R0	20
TCGA-55-8614	39		MALE	536	LUAD	Alive	T2a	N0	MX	Stage IB	0	536		TUMOR FREE	76	L-Upper	Unknown	R0	40
TCGA-55-8615	48		MALE	446	LUAD	Alive	T3	N2	MX	Stage IIIA	1	224	Distant Metastasis	TUMOR FREE	67	R-Middle	Unknown	R0	67
TCGA-55-8616	22		FEMALE	48	LUAD	Alive	T2a	N0	M0	Stage IB	0	48		TUMOR FREE	58	R-Upper	Unknown	R0	Not Available
TCGA-55-8619	89		FEMALE	416	LUAD	Alive	T3	N0	MX	Stage IIB	0	416		TUMOR FREE	72	R-Lower	Unknown	R0	Not Available
TCGA-55-8620	25		MALE	375	LUAD	Dead	T1a	N1	M1b	Stage IV	1			WITH TUMOR	60	L-Upper	NO	R0	154
TCGA-55-8621	58		FEMALE	515	LUAD	Alive	T1a	N0	MX	Stage IA	0	515		TUMOR FREE	75	L-Lower	Unknown	R0	30
TCGA-55-A48X	106		FEMALE	689	LUAD	Alive	T1b	N1	M0	Stage IIA	1	615	New Primary Tumor	TUMOR FREE	63	L-Lower	Unknown	R0	36
TCGA-55-A48Y	18		MALE	630	LUAD	Alive	T2b	N0	M0	Stage IIA	0	630		TUMOR FREE	69	L-Lower	Unknown	R0	50
TCGA-55-A48Z	51		FEMALE	651	LUAD	Alive	T1a	N3	MX	Stage IIIB	1	536	Distant Metastasis	WITH TUMOR	60	R-Upper	YES	R0	40
TCGA-55-A490	22		MALE	99	LUAD	Dead	T2b	N0	MX	Stage IIA	0	99		TUMOR FREE	78	R-Upper	YES	R0	34
TCGA-55-A491	35		FEMALE	626	LUAD	Alive	T1b	N0	MX	Stage IA	0	626		TUMOR FREE	81	L-Lower	NO	R0	45
TCGA-55-A492	9		FEMALE	596	LUAD	Alive	T1a	N0	MX	Stage IA	0	596		TUMOR FREE	70	R-Upper	NO	R0	35
TCGA-55-A493	70		FEMALE	28	LUAD	Alive	T2a	N0	M0	Stage IB	0	28		TUMOR FREE	54	R-Upper	NO	R0	53
TCGA-55-A494	75		FEMALE	481	LUAD	Alive	T2a	N0	MX	Stage IB	0	481		TUMOR FREE	61	R-Lower	YES	R0	7
TCGA-55-A4DF	63		MALE	440	LUAD	Dead	T1b	N0	MX	Stage IA	1	440	Distant Metastasis	TUMOR FREE	88	R-Lower	Unknown	R0	60
TCGA-55-A4DG	95		MALE	608	LUAD	Alive	T1b	N0	MX	Stage IA	0	608		TUMOR FREE	71	R-Upper	Unknown	R0	100
TCGA-55-A57B	69		FEMALE	546	LUAD	Alive	T1b	N0	M0	Stage IA	0	546		TUMOR FREE	80	L-Upper	NO	R0	Not Available
TCGA-62-8394	48		FEMALE	139	LUAD	Dead	T4	N2	M0	Stage IIIB	0	139		TUMOR FREE	65	L-Lower	NO	R0	Not Available
TCGA-62-8395	43		FEMALE	1216	LUAD	Alive	T3	N0	M0	Stage IIB	1	395	Locoregional Recurrence	WITH TUMOR	80	R-Upper	YES	R0	Not Available
TCGA-62-8397	14		FEMALE	1289	LUAD	Alive	T3	N0	M0	Stage IIB	0	1289		TUMOR FREE	70	R-Lower	NO	R0	Not Available
TCGA-62-8398	47		MALE	444	LUAD	Dead	T2	N2	M0	Stage IIIA	0	444		TUMOR FREE	55	R-Lower	NO	R0	20
TCGA-62-8399	28		MALE	2696	LUAD	Alive	T2	N2	M0	Stage IIIA	0	2696		TUMOR FREE	62	L-Upper	NO	R0	70
TCGA-62-8402	53		FEMALE	1498	LUAD	Dead	T2	N2	M0	Stage IIIA	1	772	Locoregional Recurrence	WITH TUMOR	73	R-Upper	YES	R0	Not Available
TCGA-62-A46O	6		FEMALE	1454	LUAD	Dead	T2	N0	M0	Stage IB	1	943	Locoregional Recurrence	WITH TUMOR	65	R-Lower	NO	R0	48
TCGA-62-A46P	9		MALE	594	LUAD	Dead	T2	N0	M0	Stage IB	1	267	Distant Metastasis	TUMOR FREE	65	L-Upper	NO	R0	40
TCGA-62-A46R	39		FEMALE	1725	LUAD	Dead	T2	N0	M0	Stage IB	0	1725		TUMOR FREE	54	L-Lower	NO	R0	25
TCGA-62-A46S	39		MALE	1653	LUAD	Dead	T2	N0	M0	Stage IB	1	527	Locoregional Recurrence	WITH TUMOR	73	L-Upper	NO	R0	40
TCGA-62-A46V	36		FEMALE	2199	LUAD	Alive	T2	N0	M0	Stage IB	0	2199		TUMOR FREE	78	L-Lower	NO	R0	Not Available
TCGA-62-A46Y	57		FEMALE	414	LUAD	Dead	T2	N2	M0	Stage IIIA	1	314	Distant Metastasis	WITH TUMOR	70	R-Lower	NO	R0	Not Available
TCGA-62-A470	9		MALE	1194	LUAD	Dead	T2	N0	M0	Stage IB	1	539	Locoregional Recurrence	WITH TUMOR	84	R-Upper	NO	R0	30
TCGA-62-A471	17		MALE	1246	LUAD	Alive	T2b	N1	M0	Stage IIB	0	1246		TUMOR FREE	64	L-Upper	NO	R0	30
TCGA-62-A472	31		MALE	910	LUAD	Alive	T3	N0	M0	Stage IIB	1	290	Locoregional Recurrence	WITH TUMOR	70	R-Lower	NO	R0	60
TCGA-64-1676	9		MALE	1728	LUAD	Alive	T1a	N0	M0	Stage IA	0	1728		TUMOR FREE	58	R-Lower	Not Available	R0	60
TCGA-64-1677	17		FEMALE	628	LUAD	Dead	T2	N2	M0	Stage IIIA	1	360		Not Available	77	R-Lower	Not Available	R0	50
TCGA-64-1678	3		FEMALE	1189	LUAD	Alive	T2b	N0	M0		0	1189		TUMOR FREE	70	R-Middle	Not Available	R0	20
TCGA-64-1679	31		FEMALE	2488	LUAD	Alive	T1	N2	M0	Stage IIIA	0	2488		TUMOR FREE	58	R-Upper	Not Available	R0	40
TCGA-64-1680	29		MALE	1126	LUAD	Alive	T2a	N2	M1	Stage IV	0	1126		TUMOR FREE	63	R-Middle	Not Available	R0	50
TCGA-64-1681	46		FEMALE	1167	LUAD	Dead	T1	N0	M0	Stage IA	1	439		Not Available	61	R-Upper	YES	R0	Not Available
TCGA-64-5774	12		MALE	2676	LUAD	Alive	T2	N0	M0	Stage IB	1	246		TUMOR FREE	60	Discrepancy	Not Available	R0	45
TCGA-64-5775	6		MALE	62	LUAD	Dead	T4	N0	M0	Stage IIIA	1			WITH TUMOR	71	L-Upper	Not Available	R0	110
TCGA-64-5778	54		MALE	1305	LUAD	Alive	T2	N0	M0	Stage IB	1	962	Distant Metastasis	TUMOR FREE	60	R-Upper	Not Available	R0	68
TCGA-64-5779	34		MALE	864	LUAD	Alive	T2	N2	M0	Stage IIIA	1	795	Distant Metastasis	TUMOR FREE	61	L-Lower	Not Available	R0	40
TCGA-64-5781	27		FEMALE	1559	LUAD	Alive	T2	N0	M0	Stage IB	1	96	Distant Metastasis	TUMOR FREE	55	R-Upper	Not Available	R0	25
TCGA-64-5815	16		MALE	866	LUAD	Alive	T2	N1	M0	Stage IIB	0	866		TUMOR FREE	74	R-Upper	YES	R0	30
TCGA-67-3770	22		FEMALE	610	LUAD	Alive	T1	N0	M0	Stage IA	0	610		TUMOR FREE	70	R-Upper	NO	R0	Not Available
TCGA-67-3771	31		FEMALE	610	LUAD	Alive	T1	N0	M0	Stage IA	0	610		TUMOR FREE	77	L-Upper	NO	R0	Not Available
TCGA-67-3772	50		FEMALE	573	LUAD	Alive	T2	N0	M0	Stage IB	0	573		TUMOR FREE	82	R-Upper	NO	Not Available	Not Available
TCGA-67-3773	34		FEMALE	427	LUAD	Alive	T2	N0	M0	Stage IB	0	427		TUMOR FREE	84	L-Lower	NO	R0	Not Available
TCGA-67-3774	55		FEMALE	385	LUAD	Alive	T2	N0	M0	Stage IB	0	385		TUMOR FREE	73	L-Lower	NO	RX	Not Available
TCGA-67-4679	35		MALE	448	LUAD	Alive	T3	N0	M0		0	448		TUMOR FREE	69	R-Lower	NO	R0	Not Available
TCGA-67-6215	37		FEMALE	174	LUAD	Alive	T2a	N0	M0	Stage IB	0	174		TUMOR FREE	52	R-Lower	NO	R0	Not Available
TCGA-67-6216	45		FEMALE	141	LUAD	Alive	T1a	N0	M0	Stage IA	0	141		TUMOR FREE	57	R-Middle	NO	R0	Not Available
TCGA-67-6217	48		FEMALE	422	LUAD	Alive	T2a	N1	M0	Stage IIA	1	296		WITH TUMOR	73	L-Upper	YES	R0	Not Available
TCGA-69-7760	24		MALE	202	LUAD	Alive	T3	N0	M0	Stage IIB	0	202		Not Available	73	R-Lower	YES	Not Available	Not Available
TCGA-69-7761	59		MALE	186	LUAD	Alive	T2a	N0	MX	Stage IB	0	186		TUMOR FREE	84	L-Lower	YES	Not Available	20
TCGA-69-7763	28		MALE	690	LUAD	Alive	T1b	N0	M0	Stage IA	0	690		Not Available	69	R-Middle	NO	Not Available	7.5
TCGA-69-7764	36		MALE	414	LUAD	Alive	T1b	N0	M0	Stage IA	0	414		Not Available	75	R-Upper	YES	Not Available	30
TCGA-69-7765	30		MALE	165	LUAD	Alive	T4	N0	MX		0	165		Not Available	56	R-Upper	NO	Not Available	Not Available
TCGA-69-7973	53		FEMALE	230	LUAD	Alive	T2a	N0	M0	Stage IB	0	230		TUMOR FREE	42	R-Middle	YES	Not Available	25
TCGA-69-7974	73		FEMALE	184	LUAD	Alive	T2a	N2	MX	Stage IIIA	1			WITH TUMOR	54	L-Upper	YES	Not Available	30
TCGA-69-7978	64		MALE	134	LUAD	Alive	T2b	N1	MX	Stage IIB	0	134		WITH TUMOR	59	R-Upper	YES	Not Available	80
TCGA-69-7979	29		FEMALE	408	LUAD	Alive	T2a	N0	MX	Stage IB	0	408		Not Available	71	R-Upper	NO	Not Available	28
TCGA-69-7980	76		FEMALE	411	LUAD	Alive	T1b	N0	M0	Stage I	0	411		TUMOR FREE	70	R-Upper	YES	Not Available	80
TCGA-69-8253	34		FEMALE	426	LUAD	Alive	T1a	N1	MX	Stage IIA	0	426		Unknown	59	R-Lower	NO	Not Available	7.8
TCGA-69-8254	202		MALE	409	LUAD	Alive	T2b				0	409		TUMOR FREE	85	R-Lower	YES	Not Available	40
TCGA-69-8255	117		MALE	129	LUAD	Alive	T1a	N0	M0	Stage IA	0	129		Unknown	71	R-Upper	YES	Not Available	40
TCGA-69-8453	55		MALE	813	LUAD	Alive	T3	N0	MX	Stage IIB	1	344	Locoregional Recurrence	WITH TUMOR	77	R-Lower	Unknown	Not Available	12
TCGA-69-A59K	30		FEMALE	591	LUAD	Alive	T3	N0	M0	Stage IIB	0	591		TUMOR FREE	60	R-Upper	YES	Not Evaluated	25
TCGA-71-6725	23		FEMALE	256	LUAD	Alive	T2	N0	M0	Stage IB	1	164	Locoregional Recurrence	TUMOR FREE	48	R-Upper	Not Available	RX	Not Available
TCGA-71-8520	14		FEMALE	210	LUAD	Dead	T2	N0	M0	Stage IB	1	179	Locoregional Recurrence	TUMOR FREE	60	L-Upper	Not Available	R0	Not Available
TCGA-73-4658	22		FEMALE	1600	LUAD	Dead	T2	N0	M0	Stage IB	0	1600		TUMOR FREE	80	L-Lower	NO	R0	25
TCGA-73-4659	60		MALE	711	LUAD	Dead	T2	N2	M0	Stage IIIA	1	35		WITH TUMOR	66	R-Upper	NO	R0	12
TCGA-73-4662	121		FEMALE	2515	LUAD	Alive	T1	N0	M0	Stage IA	1	21		TUMOR FREE	65	L-Upper	NO	R0	10
TCGA-73-4666	70		FEMALE	800	LUAD	Alive	T1	N0	M1	Stage IV	1			TUMOR FREE	52	R-Upper	NO	R0	10
TCGA-73-4668	34		FEMALE	467	LUAD	Alive	T2	N1	M0	Stage IIB	1	236		WITH TUMOR	66	L-Upper	NO	R0	55
TCGA-73-4670	27		FEMALE	131	LUAD	Alive	T2	N0	M1	Stage IV	0	131		WITH TUMOR	69	L-Upper	NO	R0	30
TCGA-73-4675	27		MALE	922	LUAD	Dead	T3	N1	M0	Stage IIIA	1	361	Locoregional Recurrence	TUMOR FREE	59	L-Lower	NO	RX	41
TCGA-73-4676	22	26	MALE	281	LUAD	Dead	T2a	N1	M0	Stage IIA	1			TUMOR FREE	45	R-Upper	NO	R0	48
TCGA-73-4677	50		MALE	38	LUAD	Dead	T2a	N0	M0		0	38		WITH TUMOR	74	R-Upper	NO	R0	Not Available
TCGA-73-7498	98		FEMALE	1189	LUAD	Alive	T1b	N0	M0	Stage IA	0	1189		TUMOR FREE	58	R-Lower	NO	R0	28
TCGA-73-7499	91		FEMALE	1531	LUAD	Dead	T2a	N0	M0	Stage IB	1	1447	Distant Metastasis	TUMOR FREE	81	R-Upper	NO	R0	Not Available
TCGA-73-A9RS	9		MALE	340	LUAD	Dead	T3	N0	M0	Stage IIB	1	107	Locoregional Recurrence	WITH TUMOR	41	R-Upper	YES	R0	11
TCGA-75-5122	90		MALE		LUAD		T2	N0	M0	Stage IB	1			WITH TUMOR	Not Available	L-Upper	NO	R0	20
TCGA-75-5125	55		MALE	2027	LUAD	Dead	T2	N1	M0	Stage IIB	1	1752		TUMOR FREE	Not Available	R-Upper	NO	R0	25
TCGA-75-5126	28		FEMALE		LUAD		T3	N2	M0	Stage IIIA	1			WITH TUMOR	Not Available	L-Upper	NO	R2	40
TCGA-75-5146	35		MALE	2368	LUAD	Alive	T2	N0	M0	Stage IB	1	1773	New Primary Tumor	TUMOR FREE	Not Available	R-Lower	NO	R0	Not Available
TCGA-75-5147	127		FEMALE	1333	LUAD	Alive	T2	N0	M0	Stage IB	0	1333		TUMOR FREE	Not Available	R-Upper	NO	R0	Not Available
TCGA-75-6203	39		FEMALE		LUAD		T2	N2	M0	Stage IIIA	0			TUMOR FREE	Not Available	L-Lower	Not Available	R0	Not Available
TCGA-75-6205	35		FEMALE		LUAD		T2a	N0	M0	Stage IB	1			TUMOR FREE	Not Available	L-Upper	Not Available	R0	Not Available
TCGA-75-6206	9		MALE	2590	LUAD	Alive	T2	N0	M0	Stage IB	0	2590		TUMOR FREE	Not Available	R-Upper	Not Available	R0	20
TCGA-75-6207	23		MALE		LUAD		T2	N2	M0	Stage IIIA	0			Not Available	Not Available	R-Upper	Not Available	R0	10
TCGA-75-6211	45		FEMALE		LUAD		T2	N0	M0	Stage IB	1			WITH TUMOR	Not Available	Discrepancy	Not Available	R0	34
TCGA-75-6212	42		FEMALE	1516	LUAD	Dead	T2	N1	M0	Stage IIB	1	1340	New Primary Tumor	TUMOR FREE	Not Available	L-Lower	Not Available	R0	Not Available
TCGA-75-6214	14		FEMALE	1115	LUAD	Dead	T2	N2	M0	Stage IIIA	1	419	Distant Metastasis	WITH TUMOR	Not Available	R-Upper	Not Available	R0	40
TCGA-75-7025	112		MALE	3305	LUAD	Alive	T2	N0	M0	Stage IB	1	1481	Locoregional Recurrence	TUMOR FREE	Not Available	L-Lower	Not Available	R0	Not Available
TCGA-75-7027	62		MALE	3059	LUAD	Alive	T2	N0	M0	Stage IB	1	2949	Locoregional Recurrence	TUMOR FREE	Not Available	L-Lower	Not Available	R0	50
TCGA-75-7030	21		MALE		LUAD		T3	N0	M0	Stage IIB	0			TUMOR FREE	Not Available	R-Lower	Not Available	R0	Not Available
TCGA-75-7031	20		FEMALE		LUAD		T2	N0	M0	Stage IB	0			TUMOR FREE	Not Available	R-Upper	Not Available	R0	5
TCGA-78-7143	50		FEMALE	4961	LUAD	Dead	T2	N0	M0	Stage IB	1	1500		Discrepancy	62	L-Upper	NO	R0	Not Available
TCGA-78-7145	18		FEMALE	826	LUAD	Dead	T4	N1	M1	Stage IV	1	422		WITH TUMOR	52	R-Middle	NO	R1	25
TCGA-78-7146	25		FEMALE	173	LUAD	Dead	T2	N2	M0	Stage IIIA	0	173		Not Available	71	L-Lower	NO	R0	6
TCGA-78-7147	53		FEMALE	586	LUAD	Dead	T2	N1	M0	Stage IIB	1	578		WITH TUMOR	67	R-Upper	NO	R0	50
TCGA-78-7148	25		MALE	626	LUAD	Dead	T2	N1	M0	Stage IIB	1	182		Not Available	71	L-Upper	NO	R0	57
TCGA-78-7149	11		MALE	3940	LUAD	Alive	T4	N0	M0	Stage IIIB	0	3940		Not Available	71	R-Lower	NO	R0	115
TCGA-78-7150	19		MALE	666	LUAD	Dead	T2	N1	M0	Stage IIB	1	139		WITH TUMOR	59	L-Lower	NO	R0	37
TCGA-78-7152	20		MALE	1215	LUAD	Dead	T2	N0	M0	Stage IB	1	1202	Distant Metastasis	WITH TUMOR	65	R-Upper	NO	R0	40
TCGA-78-7153	10		FEMALE	3635	LUAD	Alive	T2	N0	M0	Stage IB	0	3635		Not Available	65	R-Upper	NO	R0	20
TCGA-78-7154	15		MALE	593	LUAD	Dead	T3	N2	M0	Stage IIIA	0	593		Not Available	72	L-Upper	NO	R0	112.5
TCGA-78-7155	6		MALE	1171	LUAD	Dead	T2	N0	M0	Stage IB	1	209		Not Available	68	L-Upper	NO	R0	48
TCGA-78-7156	6		MALE	976	LUAD	Dead	T4	N1	M1	Stage IV	0	976		Not Available	62	Not Available	NO	R0	84
TCGA-78-7158	111		FEMALE	179	LUAD	Dead	T4	N2	M0	Stage IIIB	1	132		WITH TUMOR	59	L-Lower	NO	R1	14
TCGA-78-7159	25		FEMALE	1974	LUAD	Alive	T1	NX	M0	Stage IA	0	1974		Not Available	60	L-Upper	NO	R0	21
TCGA-78-7160	43		MALE	697	LUAD	Dead	T4	N2	M1	Stage IV	0	697		Not Available	61	R-Lower	NO	R0	43.8
TCGA-78-7161	36		FEMALE	291	LUAD	Dead	T3	N0	M0	Stage IIB	1	162	Locoregional Recurrence	WITH TUMOR	69	L-Upper	YES	R1	27.8
TCGA-78-7162	44		MALE	3169	LUAD	Dead	T1	N0	M0	Stage IA	1	2218		Not Available	75	L-Upper	NO	R0	12
TCGA-78-7163	28		MALE	7248	LUAD	Alive	T2	N0	M0	Stage IB	0	7248		TUMOR FREE	60	R-Lower	NO	R0	41
TCGA-78-7166	21		MALE	258	LUAD	Dead	T2	N1	M0	Stage IIB	0	258		Not Available	84	L-Lower	NO	R0	38
TCGA-78-7167	26		MALE	2681	LUAD	Dead	T2	N0	M1	Stage IV	1	726		WITH TUMOR	77	Not Available	NO	R0	64
TCGA-78-7220	18		FEMALE	807	LUAD	Dead	T2	N2	M0	Stage IIIA	1	531		WITH TUMOR	53	L-Upper	NO	R0	35
TCGA-78-7535	21		MALE	949	LUAD	Dead	T2	N0	M0	Stage IB	1	809		WITH TUMOR	45	L-Upper	NO	R0	35
TCGA-78-7536	46		MALE	244	LUAD	Dead	T2	N2	M0	Stage IIIA	1	231		WITH TUMOR	69	R-Upper	NO	R0	44
TCGA-78-7537	25		MALE	1622	LUAD	Dead	T2	N0	M0	Stage IB	0	1622		Not Available	72	R-Upper	NO	R0	20
TCGA-78-7539	85		FEMALE	791	LUAD	Alive	T2b	N0	M0	Stage IIA	1	688	Distant Metastasis	Not Available	75	R-Upper	NO	R0	2.2
TCGA-78-7540	26		FEMALE	1197	LUAD	Dead	T2	N0	M0	Stage IB	0	1197		Not Available	66	L-Lower	NO	R0	Not Available
TCGA-78-7542	17		MALE	321	LUAD	Dead	T2	N0	M0	Stage IB	0	321		Not Available	56	R-Upper	NO	R0	60
TCGA-78-7633	14		MALE	1528	LUAD	Dead	T2	N0	M0	Stage IB	1	1450	Locoregional Recurrence	Not Available	67	L-Upper	NO	R0	94
TCGA-78-8640	32		MALE	7062	LUAD	Alive	T1	N1	M0	Stage IIA	0	7062		TUMOR FREE	59	L-Upper	NO	R0	45
TCGA-78-8648	53		FEMALE	1209	LUAD	Dead	T3	N0	M0	Stage IIB	1	720	Locoregional Recurrence	Unknown	58	R-Upper	NO	R0	45
TCGA-78-8655	38		FEMALE	2360	LUAD	Alive	T1	N0	M0	Stage IA	0	2360		Unknown	77	L-Lower	NO	R0	10
TCGA-78-8660	57		MALE	321	LUAD	Dead	T2	N1	M0	Stage IIB	1	242	Distant Metastasis	WITH TUMOR	69	R-Lower	NO	R0	11
TCGA-78-8662	8		FEMALE	3361	LUAD	Dead	T2	N0	M0	Stage IB	1	3044	Locoregional Recurrence	Unknown	53	R-Upper	NO	R0	45
TCGA-80-5607	26		FEMALE		LUAD		T2	N1	M0	Stage IIB	1			WITH TUMOR	Not Available	L-Upper	Not Available	R0	15
TCGA-80-5608	27		FEMALE	2832	LUAD	Alive	T1	N0	M0	Stage IA	0	2832		TUMOR FREE	Not Available	R-Upper	Not Available	R0	26
TCGA-80-5611	16		MALE	2595	LUAD	Alive	T2	N0	M0	Stage IB	0	2595		TUMOR FREE	Not Available	L-Upper	Not Available	R0	60
TCGA-83-5908	145		FEMALE	824	LUAD	Alive	T1	N0	M0	Stage IA	0	824		TUMOR FREE	59	L-Upper	NO	R0	69
TCGA-86-6562	22		MALE	376	LUAD	Dead	T2a	N1	M0	Stage IIA	1	274		TUMOR FREE	52	R-Upper	Not Available	R0	Not Available
TCGA-86-6851	238		FEMALE	179	LUAD	Alive	T1b	N1	M0	Stage IIA	0	179		TUMOR FREE	73	L-Upper	Not Available	Not Available	52
TCGA-86-7701	37		MALE	947	LUAD	Alive	T2	N0	M1	Stage IV	1	424	Distant Metastasis	TUMOR FREE	66	R-Upper	Not Available	R0	Not Available
TCGA-86-7711	22		MALE	1046	LUAD	Dead	T2a	N1	M0	Stage IIA	1			TUMOR FREE	70	R-Lower	Not Available	R0	50
TCGA-86-7713	41		MALE	1157	LUAD	Alive	T2b	N0	M0	Stage IIA	0	1157		TUMOR FREE	70	R-Middle	Not Available	R0	Not Available
TCGA-86-7714	32		FEMALE	625	LUAD	Dead	T1b	N2	M0	Stage IIIA	1			WITH TUMOR	61	R-Lower	NO	R0	43
TCGA-86-7953	79		FEMALE	997	LUAD	Alive	T1b	N0	M0	Stage IA	0	997		TUMOR FREE	69	L-Upper	NO	RX	Not Available
TCGA-86-7954	120		FEMALE	605	LUAD	Alive	T2	N0	M0	Stage IB	0	605		TUMOR FREE	68	R-Lower	NO	R0	8
TCGA-86-7955	14		MALE	1072	LUAD	Alive	T2a	N0	M0	Stage IB	1	820	Locoregional Recurrence	TUMOR FREE	62	R-Lower	NO	RX	Not Available
TCGA-86-8054	13		MALE	1148	LUAD	Alive	T2b	N1	M0	Stage IIB	0	1148		TUMOR FREE	61	R-Upper	NO	R0	9
TCGA-86-8055	52		MALE	124	LUAD	Dead	T2a	N1	M0	Stage IIA	0	124		TUMOR FREE	79	L-Upper	NO	R0	60
TCGA-86-8056	102		FEMALE	139	LUAD	Alive	T4	N0	M0	Stage IIIA	0	139		TUMOR FREE	63	Other (please specify)	NO	R0	36
TCGA-86-8073	63		MALE	740	LUAD	Alive	T2a	N0	M0	Stage IB	0	740		TUMOR FREE	58	L-Upper	NO	R0	40
TCGA-86-8074	65		FEMALE	24	LUAD	Alive	T1b	N1	M0	Stage IIA	0	24		TUMOR FREE	62	L-Lower	NO	R0	40
TCGA-86-8075	64		FEMALE	694	LUAD	Dead	T2	N0	M0	Stage IB	1	199	Locoregional Recurrence	TUMOR FREE	66	L-Upper	NO	R0	Not Available
TCGA-86-8076	78		MALE	993	LUAD	Alive	T1	N0	M0	Stage IA	0	993		TUMOR FREE	42	R-Upper	NO	R0	Not Available
TCGA-86-8278	86		FEMALE	944	LUAD	Alive	T2	N1	M0	Stage IIB	1	29		TUMOR FREE	63	L-Lower	Not Available	R0	Not Available
TCGA-86-8279	45		MALE	949	LUAD	Alive	T2a	N1	M0	Stage IIA	0	949		TUMOR FREE	46	R-Upper	Not Available	R0	Not Available
TCGA-86-8280	107		FEMALE	701	LUAD	Alive	T2b	N0	M0	Stage IIA	0	701		TUMOR FREE	54	L-Lower	Not Available	R0	Not Available
TCGA-86-8281	52		MALE	0	LUAD	Alive	T1	NX	M0	Stage IA	0	0		TUMOR FREE	75	R-Lower	Not Available	Not Evaluated	30
TCGA-86-8358	29		MALE	653	LUAD	Alive	T2a	N0	M0	Stage IB	0	653		TUMOR FREE	44	R-Upper	Not Available	R0	20
TCGA-86-8359	37		MALE	444	LUAD	Dead	T3	N2	M0	Stage IIIA	0	444		TUMOR FREE	52	L-Lower	Unknown	R0	36
TCGA-86-8585	42		MALE	353	LUAD	Alive	T2a	N0	M0	Stage IB	0	353		TUMOR FREE	57	L-Upper	NO	R0	Not Available
TCGA-86-8668	81		FEMALE	423	LUAD	Alive	T1b	N0	M0	Stage IA	0	423		TUMOR FREE	61	L-Lower	Not Available	R0	Not Available
TCGA-86-8669	38		MALE	938	LUAD	Alive	T1b	N0	M0	Stage IA	1	849	Distant Metastasis	TUMOR FREE	64	R-Upper	Not Available	R0	47
TCGA-86-8671	189		FEMALE	839	LUAD	Alive	T2b	N1	M0	Stage IIB	0	839		WITH TUMOR	72	R-Upper	Not Available	R0	Not Available
TCGA-86-8672	57		MALE	19	LUAD	Dead	T3	N0	M0	Stage IIB	0	19		TUMOR FREE	59	R-Upper	Not Available	R0	Not Available
TCGA-86-8673	27		MALE	862	LUAD	Alive	T2	N0	M0	Stage IB	1	636	Locoregional Recurrence	TUMOR FREE	61	L-Upper	Unknown	R0	54
TCGA-86-8674	5		MALE	806	LUAD	Alive	T2a	N1	M0	Stage IIA	1	334	Locoregional Recurrence	TUMOR FREE	50	R-Middle	Unknown	R0	37.5
TCGA-86-A456	35		FEMALE	896	LUAD	Alive	T1a	N0	M0	Stage IA	0	896		TUMOR FREE	78	L-Upper	Unknown	R0	Not Available
TCGA-86-A4D0	28		MALE	116	LUAD	Dead	T2b	N0	M0	Stage IIA	0	116		TUMOR FREE	48	R-Upper	NO	R0	Not Available
TCGA-86-A4JF	19		MALE	737	LUAD	Dead	T3	N0	M0	Stage IIB	1	436	Distant Metastasis	TUMOR FREE	56	R-Upper	NO	R0	Not Available
TCGA-86-A4P7	80		FEMALE	415	LUAD	Alive	T2a	N0	M0	Stage IB	0	415		TUMOR FREE	63	L-Lower	NO	R0	Not Available
TCGA-86-A4P8	102		FEMALE	805	LUAD	Alive	T1b	N2	MX	Stage IIIA	0	805		Unknown	59	R-Lower	YES	Not Evaluated	Not Available
TCGA-91-6828	22	27	MALE	323	LUAD	Alive	T1a	N0	M0	Stage IA	0	323		Not Available	70	L-Lower	Not Available	R0	Not Available
TCGA-91-6829	24	29	MALE	1258	LUAD	Dead	T2	N0	MX	Stage IB	0	1258		TUMOR FREE	78	R-Lower	Not Available	R0	94.5
TCGA-91-6830	32		FEMALE	60	LUAD	Alive	T1	N1	MX	Stage IIA	1	18	Distant Metastasis	WITH TUMOR	65	L-Upper	Not Available	Not Available	12
TCGA-91-6831	57	20	MALE	310	LUAD	Alive	T2	N0	MX	Stage IB	0	310		TUMOR FREE	66	R-Middle	Not Available	Not Available	Not Available
TCGA-91-6835	175	42	FEMALE	79	LUAD	Alive	T1	N0	M0	Stage IA	0	79		Not Available	81	R-Lower	NO	R0	25
TCGA-91-6836	20	47	FEMALE	417	LUAD	Alive	T2	N0	MX	Stage IB	0	417		TUMOR FREE	52	R-Upper	NO	Not Available	50
TCGA-91-6840	28		FEMALE	372	LUAD	Alive	T1b	N0	M0	Stage IA	0	372		TUMOR FREE	59	R-Upper	Not Available	R0	50
TCGA-91-6847	6	16	FEMALE	842	LUAD	Alive	T2	N0	MX	Stage IB	1	772	Distant Metastasis	Not Available	62	R-Lower	Not Available	Not Available	Not Available
TCGA-91-6848	39		MALE	224	LUAD	Alive	T2	N2	MX	Stage IIIA	0	224		Not Available	59	L-Upper	Not Available	Not Available	Not Available
TCGA-91-6849	21	24	FEMALE	35	LUAD	Alive	T2	N2	MX	Stage IIIA	0	35		Not Available	75	L-Upper	YES	Not Available	30
TCGA-91-7771	62		MALE	492	LUAD	Alive	T3	N0	MX	Stage IIB	0	492		Not Available	62	R-Upper	NO	Not Available	75
TCGA-91-8496	38		FEMALE	505	LUAD	Alive	T2a	NX	MX	Stage IB	0	505		Unknown	63	L-Lower	NO	Not Evaluated	Not Available
TCGA-91-8497	97		FEMALE	434	LUAD	Dead	T1a	N0	MX	Stage IA	0	434		Unknown	75	R-Upper	Not Available	Not Evaluated	Not Available
TCGA-91-8499	22		FEMALE	36	LUAD	Alive	T1b	N0	MX	Stage IA	0	36		Unknown	76	L-Lower	YES	Not Evaluated	90
TCGA-91-A4BC	78		MALE	44	LUAD	Alive	T2b	N0	MX	Stage IIA	0	44		Unknown	59	R-Upper	NO	Not Evaluated	30
TCGA-91-A4BD	9		MALE	603	LUAD	Alive	T1b	N1	MX	Stage IIA	0	603		TUMOR FREE	78	L-Lower	NO	RX	Not Available
TCGA-93-7347	192		FEMALE	683	LUAD	Alive	T1a	N0	MX	Stage IA	0	683		TUMOR FREE	76	R-Upper	NO	R0	11
TCGA-93-7348	44		FEMALE	531	LUAD	Alive	T1a	N0	MX	Stage IA	0	531		TUMOR FREE	75	R-Upper	NO	R0	42
TCGA-93-8067	58		MALE	186	LUAD	Alive	T2a	N0	MX	Stage IB	0	186		TUMOR FREE	77	L-Lower	NO	RX	20
TCGA-93-A4JN	60		MALE	718	LUAD	Alive	T2a	N0	M1a	Stage IV	1			WITH TUMOR	71	L-Upper	YES	RX	40
TCGA-93-A4JO	100		MALE	33	LUAD	Dead	T1a	N0	MX	Stage IA	0	33		TUMOR FREE	70	R-Lower	NO	RX	50
TCGA-93-A4JP	60		MALE	578	LUAD	Alive	TX	NX	M1b	Stage IV	1	497	Distant Metastasis	WITH TUMOR	64	R-Lower	YES	RX	Not Available
TCGA-93-A4JQ	184		MALE	526	LUAD	Alive	T1b	N0	MX	Stage IA	0	526		TUMOR FREE	49	R-Upper	NO	RX	Not Available
TCGA-95-7039	8		FEMALE	1272	LUAD	Alive	T3	N0	MX	Stage IIB	1	1258	Locoregional Recurrence	TUMOR FREE	54	R-Upper	Not Available	Not Available	34
TCGA-95-7043	4		FEMALE	503	LUAD	Dead	T1a	N0	MX	Stage IA	1			TUMOR FREE	63	R-Upper	Not Available	Not Available	40
TCGA-95-7562	9		MALE	87	LUAD	Dead	T2a	N1	M0	Stage IIA	0	87		TUMOR FREE	71	R-Lower	Not Available	RX	10
TCGA-95-7567	44		MALE	568	LUAD	Alive	T2b	N1	M0	Stage IIB	0	568		TUMOR FREE	61	R-Upper	Not Available	Not Available	Not Available
TCGA-95-7944	64		MALE	377	LUAD	Alive	T1a	N0	M0	Stage IA	0	377		TUMOR FREE	71	L-Lower	Not Available	R0	50
TCGA-95-7947	55		MALE	477	LUAD	Alive	T1a	N0	M0	Stage IA	0	477		TUMOR FREE	67	L-Upper	Not Available	R0	100
TCGA-95-7948	130		FEMALE	476	LUAD	Alive	T2a	N0	M0	Stage IB	0	476		TUMOR FREE	42	R-Lower	Not Available	R0	0.15
TCGA-95-8039	195		MALE	830	LUAD	Alive	T1	N0	MX	Stage IA	1	228	Locoregional Recurrence	TUMOR FREE	72	R-Upper	Not Available	RX	Not Available
TCGA-95-8494	14		MALE	84	LUAD	Alive	T2a	N1	M0	Stage IIA	0	84		Unknown	67	R-Middle	NO	Not Evaluated	Not Available
TCGA-95-A4VK	105		FEMALE	651	LUAD	Alive	T2b	N2	M0	Stage IIIA	1	496	Distant Metastasis	TUMOR FREE	74	R-Upper	YES	RX	45
TCGA-95-A4VN	78		FEMALE	553	LUAD	Alive	T2a	N1	M0	Stage IIA	0	553		TUMOR FREE	62	R-Lower	YES	R0	42
TCGA-95-A4VP	39		FEMALE	605	LUAD	Alive	T2b	N2	M0	Stage IIIA	1	216	Distant Metastasis	TUMOR FREE	66	L-Lower	NO	Not Evaluated	20
TCGA-97-7546	87		FEMALE	1285	LUAD	Alive	T1	N0	MX	Stage IA	1	1255	New Primary Tumor	TUMOR FREE	76	L-Upper	Not Available	R0	25
TCGA-97-7547	61		FEMALE	1965	LUAD	Alive	T2	N0	MX	Stage IB	1	775		TUMOR FREE	67	R-Upper	Not Available	Not Available	30
TCGA-97-7552	119		MALE	1932	LUAD	Alive	T2	N0	MX	Stage IB	1	798	New Primary Tumor	TUMOR FREE	70	L-Lower	Not Available	Not Available	40
TCGA-97-7553	84		FEMALE	1870	LUAD	Alive	T1	N0	MX	Stage IA	0	1870		TUMOR FREE	58	L-Lower	Not Available	Not Available	20
TCGA-97-7554	27		FEMALE	775	LUAD	Alive	T2a	N2	M0	Stage IIIA	0	775		TUMOR FREE	83	L-Lower	Not Available	R0	30
TCGA-97-7937	20		MALE	564	LUAD	Alive	T2a	N0	MX	Stage IB	0	564		Not Available	65	L-Upper	YES	Not Available	35
TCGA-97-7938	37		FEMALE	18	LUAD	Dead	T1a	N0	MX	Stage IA	0	18		TUMOR FREE	76	R-Upper	YES	R0	40
TCGA-97-7941	90		FEMALE	484	LUAD	Alive	T1b	N0	MX	Stage IA	0	484		TUMOR FREE	72	L-Upper	YES	R0	22.5
TCGA-97-8171	59		MALE	568	LUAD	Alive	T2a	N2	M1a	Stage IV	1	441	Distant Metastasis	WITH TUMOR	81	Other (please specify)	YES	Not Available	65
TCGA-97-8172	236		FEMALE	545	LUAD	Alive	T2a	N0	M0	Stage IB	0	545		TUMOR FREE	75	R-Upper	YES	Not Available	20
TCGA-97-8174	108		MALE	164	LUAD	Dead	T2b	N0	M0	Stage IIA	0	164		Not Available	67	R-Upper	YES	Not Available	40
TCGA-97-8175	37		FEMALE	551	LUAD	Alive	T2a	N0	M0	Stage IB	1	294	Locoregional Recurrence	TUMOR FREE	55	L-Upper	YES	Not Available	Not Available
TCGA-97-8176	28		MALE	468	LUAD	Dead	T3	N1	M0	Stage IIIA	1	39	Distant Metastasis	TUMOR FREE	63	R-Lower	YES	R0	40
TCGA-97-8177	62		FEMALE	499	LUAD	Alive	T2a	N0	M0	Stage IB	0	499		TUMOR FREE	59	L-Lower	YES	Not Available	Not Available
TCGA-97-8179	29		MALE	435	LUAD	Alive	T1a	N0	M0	Stage IA	0	435		TUMOR FREE	72	R-Upper	YES	Not Available	60
TCGA-97-8547	42		FEMALE	657	LUAD	Alive	T2a	N2	MX	Stage IIIA	0	657		TUMOR FREE	78	R-Lower	YES	Not Evaluated	Not Available
TCGA-97-8552	78		FEMALE	626	LUAD	Alive	T1a	N0	MX	Stage I	0	626		TUMOR FREE	55	L-Lower	YES	Not Evaluated	Not Available
TCGA-97-A4LX	161		MALE	614	LUAD	Alive	T2a	N0	M0	Stage IB	0	614		Unknown	81	Other (please specify)	NO	Not Evaluated	120
TCGA-97-A4M0	115		FEMALE	652	LUAD	Alive	T2a	N0	M0	Stage IB	0	652		Unknown	60	R-Upper	NO	Not Evaluated	34
TCGA-97-A4M1	71		FEMALE	601	LUAD	Alive	T1a	N0	M0	Stage IA	0	601		Unknown	52	R-Upper	NO	Not Evaluated	3
TCGA-97-A4M2	106		MALE	624	LUAD	Alive	T1a	N0	M0	Stage IA	0	624		TUMOR FREE	66	R-Middle	NO	R0	100
TCGA-97-A4M3	17		FEMALE	540	LUAD	Alive	T1b	N0	M0	Stage IA	1	54	New Primary Tumor	Unknown	69	R-Upper	NO	Not Evaluated	37.5
TCGA-97-A4M5	56		MALE	634	LUAD	Alive	T1b	N0	M0	Stage IA	0	634		Unknown	83	R-Upper	NO	Not Evaluated	6
TCGA-97-A4M6	130		FEMALE	568	LUAD	Alive	T1a	N0	M0	Stage IA	0	568		Unknown	45	R-Lower	YES	Not Evaluated	Not Available
TCGA-97-A4M7	113		MALE	629	LUAD	Alive	T1b	N0	M0	Stage IA	0	629		TUMOR FREE	74	R-Middle	YES	R0	40
TCGA-99-7458	123		FEMALE	747	LUAD	Alive	T4	N0	M0	Stage IIIA	1			TUMOR FREE	74	R-Lower	YES	R0	52
TCGA-99-8025	45		FEMALE	1060	LUAD	Alive	T3	N2	M0	Stage IIIA	0	1060		TUMOR FREE	72	R-Upper	YES	R0	20
TCGA-99-8028	110		FEMALE	1118	LUAD	Alive	T1a	N0	M0	Stage IA	0	1118		TUMOR FREE	50	L-Upper	YES	R0	30
TCGA-99-8032	62		MALE	44	LUAD	Alive	T1a	N0	M0	Stage IA	0	44		TUMOR FREE	61	R-Upper	YES	R0	90
TCGA-99-8033	82		FEMALE	656	LUAD	Dead	TX	NX	M1	Stage IV	1			WITH TUMOR	74	R-Upper	YES	R0	Not Available
TCGA-99-AA5R	117		FEMALE	658	LUAD	Alive	T1a	N0	M0	Stage IA	0	658		TUMOR FREE	70	L-Lower	YES	R0	46
TCGA-J2-8192	76		FEMALE	739	LUAD	Alive	T2a	N1	MX	Stage IIA	1	482	Locoregional Recurrence	TUMOR FREE	65	L-Upper	YES	Not Available	Not Available
TCGA-J2-8194	42		FEMALE	724	LUAD	Alive	T3	N0	MX	Stage IIB	1	470	Distant Metastasis	Unknown	69	R-Lower	Unknown	Not Available	20
TCGA-J2-A4AD	18		FEMALE	550	LUAD	Dead	T1a	N0	MX	Stage IA	1	524	Locoregional Recurrence	TUMOR FREE	61	L-Upper	NO	RX	120
TCGA-J2-A4AE	46		FEMALE	1079	LUAD	Alive	T1a	N0	MX	Stage IA	0	1079		TUMOR FREE	77	L-Upper	NO	R0	Not Available
TCGA-J2-A4AG	68		FEMALE	988	LUAD	Alive	T1b	N0	MX	Stage IA	0	988		TUMOR FREE	66	L-Upper	NO	R0	25
TCGA-L4-A4E5	40		FEMALE	578	LUAD	Alive	T1	N0	M0	Stage I	0	578		TUMOR FREE	48	L-Upper	NO	R0	33
TCGA-L4-A4E6	61		MALE	435	LUAD	Alive	T1	N0	M0	Stage IA	0	435		TUMOR FREE	67	R-Upper	NO	R0	30
TCGA-L9-A443	25		FEMALE	193	LUAD	Dead	T1a	N0	MX	Stage IA	0	193		Not Available	63	L-Lower	NO	R0	90
TCGA-L9-A444	87		FEMALE	307	LUAD	Alive	T1a	N0	MX	Stage IA	0	307		Not Available	60	R-Upper	NO	R0	10
TCGA-L9-A50W	72		MALE	442	LUAD	Dead	T1b	N1	MX	Stage IIA	1	389	Distant Metastasis	TUMOR FREE	75	L-Lower	YES	R0	19
TCGA-L9-A5IP	11		FEMALE	58	LUAD	Dead	T3	N2	M1b	Stage IV	1	49	Locoregional Recurrence	WITH TUMOR	40	R-Upper	YES	R1	Not Available
TCGA-L9-A743	113		MALE	664	LUAD	Alive	T2a	N1	M0	Stage IIA	0	664		TUMOR FREE	56	L-Upper	NO	R0	40.5
TCGA-L9-A7SV	28		MALE	565	LUAD	Alive	T2a	N1	M0	Stage IIA	0	565		TUMOR FREE	69	L-Lower	NO	R0	93
TCGA-L9-A8F4	126		FEMALE	476	LUAD	Alive	T2a	N0	MX	Stage IB	0	476		TUMOR FREE	64	L-Upper	NO	R0	14
TCGA-MN-A4N1	21		MALE	827	LUAD	Alive	T2a	N1	M0	Stage IIA	0	827		Unknown	60	R-Upper	YES	R0	Not Available
TCGA-MN-A4N4	19		MALE	1175	LUAD	Alive	T1b	N0	M0	Stage IA	0	1175		Unknown	57	L-Upper	NO	R0	Not Available
TCGA-MN-A4N5	90		MALE	84	LUAD	Alive	T1a	N0	M0	Stage IA	0	84		Unknown	63	L-Upper	YES	R0	Not Available
TCGA-MP-A4SV	87		MALE	2620	LUAD	Dead	T2	N0	M0	Stage IB	0	2620		Unknown	67	L-Lower	NO	R0	110
TCGA-MP-A4SW	79		MALE	1778	LUAD	Dead	T2	N1	M0	Stage IIB	0	1778		Unknown	53	L-Upper	NO	R0	15
TCGA-MP-A4SY	33		MALE	1501	LUAD	Dead	T2	N1	M0	Stage IIB	1	489	Locoregional Recurrence	TUMOR FREE	61	R-Lower	NO	R0	40
TCGA-MP-A4T4	83		FEMALE	2617	LUAD	Dead	T2	N1	M0	Stage IIB	0	2617		Unknown	68	R-Lower	NO	R0	50
TCGA-MP-A4T6	171		FEMALE	1790	LUAD	Dead	T1	N2	MX	Stage IIIA	0	1790		TUMOR FREE	76	L-Lower	NO	R0	50
TCGA-MP-A4T7	43		FEMALE	167	LUAD	Dead	T2	N0	M1	Stage IV	0	167		Unknown	75	R-Lower	NO	R0	50
TCGA-MP-A4T8	53		MALE	161	LUAD	Dead	T2	N2	M0	Stage IIIA	0	161		Unknown	68	L-Upper	NO	R0	25
TCGA-MP-A4T9	85		FEMALE	1265	LUAD	Dead	T2	N2	MX	Stage IIIA	1	341	Locoregional Recurrence	WITH TUMOR	54	L-Upper	NO	RX	24
TCGA-MP-A4TA	35		FEMALE	950	LUAD	Dead	T1	N0	M0	Stage IA	1	725	Distant Metastasis	WITH TUMOR	75	R-Upper	NO	R0	55
TCGA-MP-A4TC	44		MALE	74	LUAD	Dead	T1	N2	M0	Stage IIIA	0	74		TUMOR FREE	77	R-Middle	NO	R0	125
TCGA-MP-A4TD	47		MALE	307	LUAD	Dead	T2	N2	M0	Stage IIIA	1	226	Locoregional Recurrence	Unknown	71	L-Lower	NO	RX	20
TCGA-MP-A4TE	18		MALE	896	LUAD	Dead	T2b	N0	MX	Stage IIA	1	226	Locoregional Recurrence	WITH TUMOR	56	L-Lower	NO	RX	40
TCGA-MP-A4TF	21		FEMALE	336	LUAD	Dead	T2b	N0	M0	Stage IIA	1	195	Distant Metastasis	WITH TUMOR	58	R-Upper	NO	R0	40
TCGA-MP-A4TH	154		FEMALE	741	LUAD	Alive	T1a	N0	M0	Stage IA	0	741		TUMOR FREE	70	L-Lower	NO	R0	20
TCGA-MP-A4TI	125		MALE	429	LUAD	Dead	T2a	N1	M0	Stage IIA	1	84	Locoregional Recurrence	WITH TUMOR	72	R-Lower	YES	R0	35
TCGA-MP-A4TJ	120		FEMALE	339	LUAD	Dead	T1	N0	M0	Stage IA	0	339		Unknown	62	R-Upper	NO	R0	Not Available
TCGA-MP-A4TK	64		FEMALE	582	LUAD	Dead	T2	N1	MX	Stage IIB	1	397	Distant Metastasis	WITH TUMOR	56	R-Lower	NO	R0	28
TCGA-MP-A5C7	56		FEMALE	2248	LUAD	Alive	T2	N0	M0	Stage IB	0	2248		TUMOR FREE	76	L-Upper	NO	R0	15
TCGA-NJ-A4YF	31		FEMALE	2161	LUAD	Alive	T1	N0	M0	Stage IA	0	2161		Unknown	50	R-Upper	NO	Not Evaluated	30
TCGA-NJ-A4YG	48		MALE	2261	LUAD	Alive	T2	N0	M0	Stage IB	0	2261		TUMOR FREE	65	L-Upper	Not Available	Not Evaluated	104
TCGA-NJ-A4YI	22		FEMALE	4	LUAD	Dead	T2	N2	M0	Stage IIIA	0	4		Unknown	87	R-Upper	Unknown	Not Evaluated	3
TCGA-NJ-A4YP	53		MALE	50	LUAD	Alive	T2a	N0	M0	Stage IB	0	50		TUMOR FREE	52	R-Lower	NO	Not Evaluated	60
TCGA-NJ-A4YQ	69		FEMALE	1432	LUAD	Alive	T1b	N0	M0	Stage IA	0	1432		TUMOR FREE	69	L-Upper	NO	RX	40
TCGA-NJ-A55A	71		FEMALE	15	LUAD	Alive	T2	N0	M0	Stage IB	0	15		TUMOR FREE	76	R-Lower	NO	Not Available	25
TCGA-NJ-A55O	38		FEMALE	13	LUAD	Alive	T1b	N1	M0	Stage IIA	0	13		TUMOR FREE	56	R-Upper	NO	Not Available	30
TCGA-NJ-A55R	60		MALE	603	LUAD	Alive	T1b	N0	MX	Stage IA	0	603		TUMOR FREE	67	L-Upper	NO	Not Available	5
TCGA-NJ-A7XG	20		MALE	617	LUAD	Alive	T4	N1	M0	Stage IIIA	1			WITH TUMOR	49	L-Upper	YES	Not Available	Not Available
TCGA-O1-A52J	175		FEMALE	1798	LUAD	Dead	T1	N0	MX	Stage IA	1	898	Locoregional Recurrence	WITH TUMOR	74	L-Lower	NO	Not Evaluated	45
TCGA-S2-AA1A	82		FEMALE	513	LUAD	Alive	T1b	N0	M0	Stage IA	0	513		TUMOR FREE	68	R-Upper	NO	R0	95

## Sheet: Sheet2
TCGA-22-4593	11	100
TCGA-22-4609	11	98
TCGA-22-5471	11	69
TCGA-22-5472	11	111
TCGA-22-5478	11	161
TCGA-22-5481	11	97
TCGA-22-5482	11	156
TCGA-22-5483	11	87
TCGA-22-5489	11	111
TCGA-22-5491	11	92
TCGA-33-4587	11	77
TCGA-33-6737	11	108
TCGA-34-7107	11	81
TCGA-34-8454	11	134
TCGA-39-5040	11	85
TCGA-43-5670	11	115
TCGA-43-6143	11	181
TCGA-43-6647	11	167
TCGA-43-6771	11	92
TCGA-43-6773	11	37
TCGA-43-7657	11	114
TCGA-43-7658	11	106
TCGA-51-4079	11	183
TCGA-51-4081	11	266
TCGA-56-7222	11	51
TCGA-56-7579	11	93
TCGA-56-7580	11	74
TCGA-56-7582	11	87
TCGA-56-7730	11	51
TCGA-56-7731	11	50
TCGA-56-7823	11	91
TCGA-56-8082	11	81
TCGA-56-8083	11	58
TCGA-56-8201	11	80
TCGA-56-8309	11	35
TCGA-56-8623	11	115
TCGA-58-8386	11	78
TCGA-60-2709	11	133
TCGA-77-7138	11	88
TCGA-77-7142	11	53
TCGA-77-7335	11	61
TCGA-77-7337	11	100
TCGA-77-7338	11	70
TCGA-77-8007	11	84
TCGA-77-8008	11	76
TCGA-85-7710	11	463
TCGA-90-6837	11	89
TCGA-90-7767	11	87
TCGA-92-7340	11	120
TCGA-44-2665	-11	51
TCGA-44-2662	-11	69
TCGA-50-5931	-11	28
TCGA-55-6984	-11	84
TCGA-91-6836	-11	47
TCGA-50-5933	-11	44
TCGA-91-6831	-11	20
TCGA-49-4490	-11	41
TCGA-44-2661	-11	69
TCGA-38-4632	-11	26
TCGA-55-6971	-11	37
TCGA-49-6742	-11	32
TCGA-44-6148	-11	75
TCGA-55-6978	-11	29
TCGA-55-6975	-11	28
TCGA-44-6778	-11	70
TCGA-44-6146	-11	48
TCGA-50-5939	-11	43
TCGA-44-6776	-11	24
TCGA-44-6777	-11	64
TCGA-50-5936	-11	52
TCGA-91-6829	-11	29
TCGA-55-6986	-11	121
TCGA-44-5645	-11	83
TCGA-55-6969	-11	54
TCGA-49-6745	-11	35
TCGA-49-6744	-11	38
TCGA-50-5935	-11	35
TCGA-55-6981	-11	32
TCGA-38-4627	-11	60
TCGA-44-2655	-11	146
TCGA-44-6147	-11	52
TCGA-38-4626	-11	65
TCGA-44-6144	-11	32
TCGA-55-6979	-11	37
TCGA-55-6985	-11	63
TCGA-44-2668	-11	79
TCGA-91-6835	-11	42
TCGA-73-4676	-11	26
TCGA-55-6982	-11	57
TCGA-55-6972	-11	33
TCGA-50-5930	-11	20
TCGA-55-6980	-11	35
TCGA-44-6145	-11	34
TCGA-55-6970	-11	73
TCGA-49-6761	-11	31
TCGA-44-2657	-11	180
TCGA-91-6849	-11	24
TCGA-50-6595	-11	95
TCGA-50-5932	-11	39
TCGA-91-6828	-11	27
TCGA-44-3398	-11	98
TCGA-91-6847	-11	16
TCGA-49-6743	-11	29
TCGA-38-4625	-11	89
TCGA-55-6968	-11	54
TCGA-49-4512	-11	16
TCGA-55-6983	-11	35
TCGA-44-3396	-11	132
