# Supplementary material for: Long non-coding RNA BZRAP1-AS1 functions in malignancy and prognosis for non-small-cell lung cancer
Source: PeerJ journal article supplement (doi:10.7717/peerj.13871), 2022-08-23
Supplement: Raw_data.zip [file The relative expression of BZRAP1-AS1 in NSCLC cell lines.xls]

## Sheet: Sheet2
Well	Sample Name	Target Name	Task	Reporter	Quencher	RQ	RQ Min	RQ Max	Cт	Cт Mean	Cт SD	ΔCт	ΔCт Mean	ΔCт SE
A4	A549	BZRAP1-AS1	UNKNOWN	SYBR	None	1	0.883741	1.13155	23.5728	23.5593	0.0889331		-2.31328	0.0642205
A5	A549	BZRAP1-AS1	UNKNOWN	SYBR	None	1	0.883741	1.13155	23.6407	23.5593	0.0889331		-2.31328	0.0642205
A6	A549	BZRAP1-AS1	UNKNOWN	SYBR	None	1	0.883741	1.13155	23.4644	23.5593	0.0889331		-2.31328	0.0642205
B4	H1299	BZRAP1-AS1	UNKNOWN	SYBR	None	0.0867282	0.0606939	0.12393	28.641	28.4653	0.291158		1.21407	0.185471
B5	H1299	BZRAP1-AS1	UNKNOWN	SYBR	None	0.0867282	0.0606939	0.12393	28.6256	28.4653	0.291158		1.21407	0.185471
B6	H1299	BZRAP1-AS1	UNKNOWN	SYBR	None	0.0867282	0.0606939	0.12393	28.1292	28.4653	0.291158		1.21407	0.185471
C4	H226	BZRAP1-AS1	UNKNOWN	SYBR	None	0.574839	0.512474	0.644794	24.71	24.7609	0.06032		-1.51451	0.0596732
C5	H226	BZRAP1-AS1	UNKNOWN	SYBR	None	0.574839	0.512474	0.644794	24.7452	24.7609	0.06032		-1.51451	0.0596732
C6	H226	BZRAP1-AS1	UNKNOWN	SYBR	None	0.574839	0.512474	0.644794	24.8276	24.7609	0.06032		-1.51451	0.0596732
D4	H1395	BZRAP1-AS1	UNKNOWN	SYBR	None	0.151562	0.0695832	0.330121	30.3519	29.7177	0.629951		0.408744	0.404508
D5	H1395	BZRAP1-AS1	UNKNOWN	SYBR	None	0.151562	0.0695832	0.330121	29.7089	29.7177	0.629951		0.408744	0.404508
D6	H1395	BZRAP1-AS1	UNKNOWN	SYBR	None	0.151562	0.0695832	0.330121	29.0921	29.7177	0.629951		0.408744	0.404508
F4	H1703	BZRAP1-AS1	UNKNOWN	SYBR	None	0.0110007	8.81921e-09	13721.8	29.1022	29.0111	12.6313		4.19298	7.29366
F5	H1703	BZRAP1-AS1	UNKNOWN	SYBR	None	0.0110007	8.81921e-09	13721.8	29.0211	29.0111	12.6313		4.19298	7.29366
F6	H1703	BZRAP1-AS1	UNKNOWN	SYBR	None	0.0110007	8.81921e-09	13721.8	28.91	29.0111	12.6313		4.19298	7.29366
G4	HCC827	BZRAP1-AS1	UNKNOWN	SYBR	None	0.0116058	0.00172964	0.0778748	32.2795	31.425	1.21273		4.11572	0.862954
G5	HCC827	BZRAP1-AS1	UNKNOWN	SYBR	None	0.0116058	0.00172964	0.0778748	30.5674	32.425	1.21273		4.11572	0.862954
G6	HCC827	BZRAP1-AS1	UNKNOWN	SYBR	None	0.0116058	0.00172964	0.0778748	31.427	33.425	1.21273		4.11572	0.862954
A10	A549	GAPDH	UNKNOWN	SYBR	None	1	0.901879	1.1088	25.433	25.5004	0.0646194		-0.372228	0.0536637
A11	A549	GAPDH	UNKNOWN	SYBR	None	1	0.901879	1.1088	25.5063	25.5004	0.0646194		-0.372228	0.0536637
A12	A549	GAPDH	UNKNOWN	SYBR	None	1	0.901879	1.1088	25.5618	25.5004	0.0646194		-0.372228	0.0536637
B10	H1299	GAPDH	UNKNOWN	SYBR	None	14.2078	11.4034	17.7019	23.1389	23.0504	0.144003		-4.20084	0.114254
B11	H1299	GAPDH	UNKNOWN	SYBR	None	14.2078	11.4034	17.7019	23.128	23.0504	0.144003		-4.20084	0.114254
B12	H1299	GAPDH	UNKNOWN	SYBR	None	14.2078	11.4034	17.7019	22.8842	23.0504	0.144003		-4.20084	0.114254
C10	H226	GAPDH	UNKNOWN	SYBR	None	14.1623	11.9139	16.8352	22.0291	22.0792	0.13102		-4.19622	0.0898342
C11	H226	GAPDH	UNKNOWN	SYBR	None	14.1623	11.9139	16.8352	21.9807	22.0792	0.13102		-4.19622	0.0898342
C12	H226	GAPDH	UNKNOWN	SYBR	None	14.1623	11.9139	16.8352	22.2279	22.0792	0.13102		-4.19622	0.0898342
D10	H1395	GAPDH	UNKNOWN	SYBR	None	2.25066	1.53463	3.30078	27.5983	27.7663	0.157282		-1.54258	0.198979
D11	H1395	GAPDH	UNKNOWN	SYBR	None	2.25066	1.53463	3.30078	27.91	27.7663	0.157282		-1.54258	0.198979
D12	H1395	GAPDH	UNKNOWN	SYBR	None	2.25066	1.53463	3.30078	27.7907	27.7663	0.157282		-1.54258	0.198979
F10	H1703	GAPDH	UNKNOWN	SYBR	None	13.3505	10.1623	17.5389	20.5542	20.7071	0.135537		-4.11105	0.141789
F11	H1703	GAPDH	UNKNOWN	SYBR	None	13.3505	10.1623	17.5389	20.7546	20.7071	0.135537		-4.11105	0.141789
F12	H1703	GAPDH	UNKNOWN	SYBR	None	13.3505	10.1623	17.5389	20.8124	20.7071	0.135537		-4.11105	0.141789
G10	HCC827	GAPDH	UNKNOWN	SYBR	None	7.08268	5.65315	8.87371	23.9841	24.1127	0.114822		-3.19652	0.117143
G11	HCC827	GAPDH	UNKNOWN	SYBR	None	7.08268	5.65315	8.87371	24.1492	24.1127	0.114822		-3.19652	0.117143
G12	HCC827	GAPDH	UNKNOWN	SYBR	None	7.08268	5.65315	8.87371	24.2048	24.1127	0.114822		-3.19652	0.117143
Block Type	96alum
Chemistry	SYBR_GREEN
Experiment File Name	F:\PCR数据\2020-11-23\2020-11-23.eds
Experiment Run End Time	2020-11-23 22:00:56 下午 CST
Instrument Type	sds7500
Passive Reference	ROX
Analysis Type	Singleplex
Endogenous Control	PVT1
RQ Min/Max Confidence Level	95.0
Reference Sample	A549
